# Supplementary material
Source: PubMed Central journal article supplement (PMC6525064)

**Data S1.** NMR analysis and data for isolated streptophenazines, related to STAR methods isolation and characterization of streptophenazines and **Figures 1, 2** and **3**. All spectra recorded in CDCl<sub>3</sub> with TMS, 600 MHz.  $\delta$  in ppm, J in Hz. Abbreviations: d = doublet, t = triplet, s = singlet, m = multiplet.

NMR spectroscopic data of compound **9** (oxo-streptophenazine A).

| Position                    | $\delta_c$ | $\delta_H$ mult. (J)        | HMBC                                     | COSY   |
|-----------------------------|------------|-----------------------------|------------------------------------------|--------|
| <b>1</b>                    | 131.5      |                             |                                          |        |
| <b>2</b>                    | 132.9      | 8.29 dd (1.45, 6.89)        | 4, 10a, <b>1-COOCH<sub>3</sub></b>       | 3      |
| <b>3</b>                    | 129.9      | 7.91 dd (6.87, 8.75)        | 1, 4a                                    | 2, 4   |
| <b>4</b>                    | 133.5      | 8.41 dd (1.42, 8.69)        | 2, 10a                                   | 3      |
| <b>4a</b>                   | 142.1      |                             |                                          |        |
| <b>5a</b>                   | 140.9      |                             |                                          |        |
| <b>6</b>                    | 137.1      |                             |                                          |        |
| <b>7</b>                    | 133.9      | 8.36 dd (1.45, 6.99)        | 1', 9, 5a                                | 8      |
| <b>8</b>                    | 130.1      | 7.94 dd (6.95, 8.71)        | 6, 9a                                    | 7, 9   |
| <b>9</b>                    | 135.1      | 8.51 dd (1.45, 8.68)        | 7, 5a                                    | 8      |
| <b>9a</b>                   | 142.9      |                             |                                          |        |
| <b>10a</b>                  | 141        |                             |                                          |        |
| <b>1'</b>                   | 198.4      |                             |                                          |        |
| <b>2'</b>                   | 59.9       | 5.06 t (7.02, 7.02)         | 4', 3', <b>2'-COOCH<sub>3</sub></b> , 1' | 3'     |
| <b>3'</b>                   | 29.12      | 2.09 and 2.05               | 4', 5', 2', 2'b, 1'                      | 2', 3' |
| <b>4'</b>                   | 25.82      | 1.44                        | 3', 5', 2'                               | 5'     |
| <b>5'</b>                   | 38.81      | 1.2                         | 7', 8', 3', 6', 4'                       | 4', 6' |
| <b>6'</b>                   | 27.83      | 1.51 dt (6.68, 6.68, 13.39) | 7' and 8', 4', 5'                        | 7', 8' |
| <b>7'</b>                   | 22.35      | 0.82 t (6.88, 6.88)         | 8', 6', 5'                               | 6'     |
| <b>8'</b>                   | 22.35      | 0.82 t (6.88, 6.88)         | 7', 6', 5'                               | 6'     |
| <b>1-COOCH<sub>3</sub></b>  | 167.1      |                             |                                          |        |
| <b>1-COOCH<sub>3</sub></b>  | 52.8       | 4.11 s                      | <b>1-COOCH<sub>3</sub></b>               |        |
| <b>2'-COOCH<sub>3</sub></b> | 171.5      |                             |                                          |        |
| <b>2'-COOCH<sub>3</sub></b> | 52.2       | 3.64, s                     | <b>2'-COOCH<sub>3</sub></b>              |        |

$^1\text{H}$ , HSQC, HMBC, and COSY NMR spectra and key HMBC and COSY correlations of compound **9** (oxo-streptophenazine A).

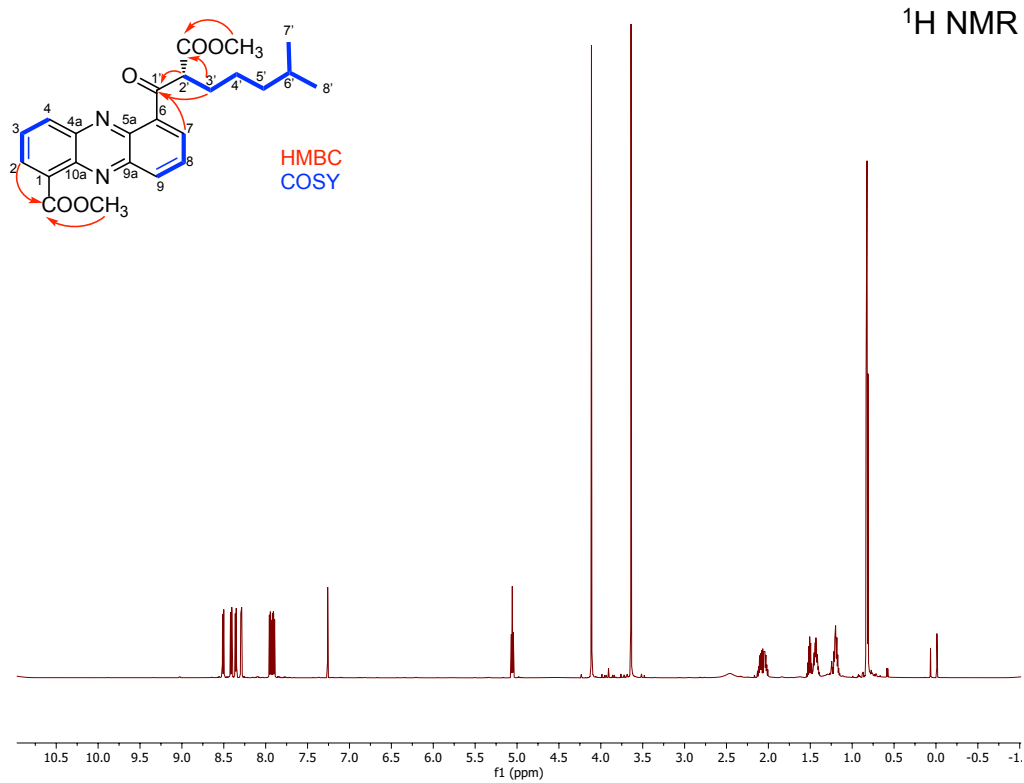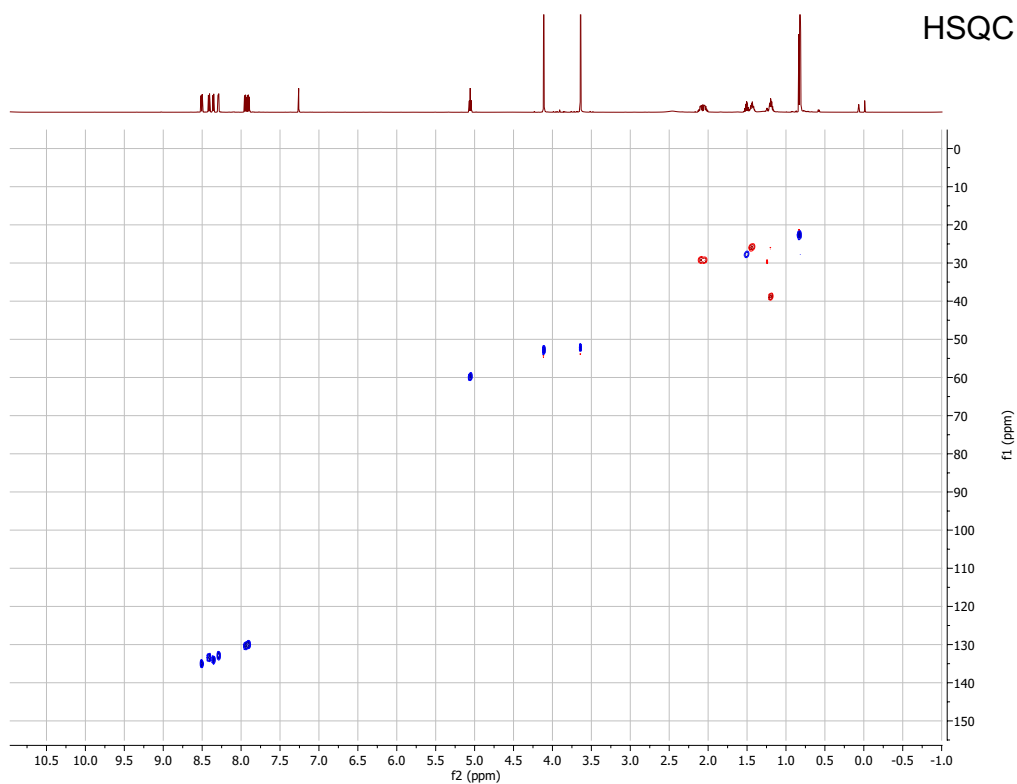

# HMBC

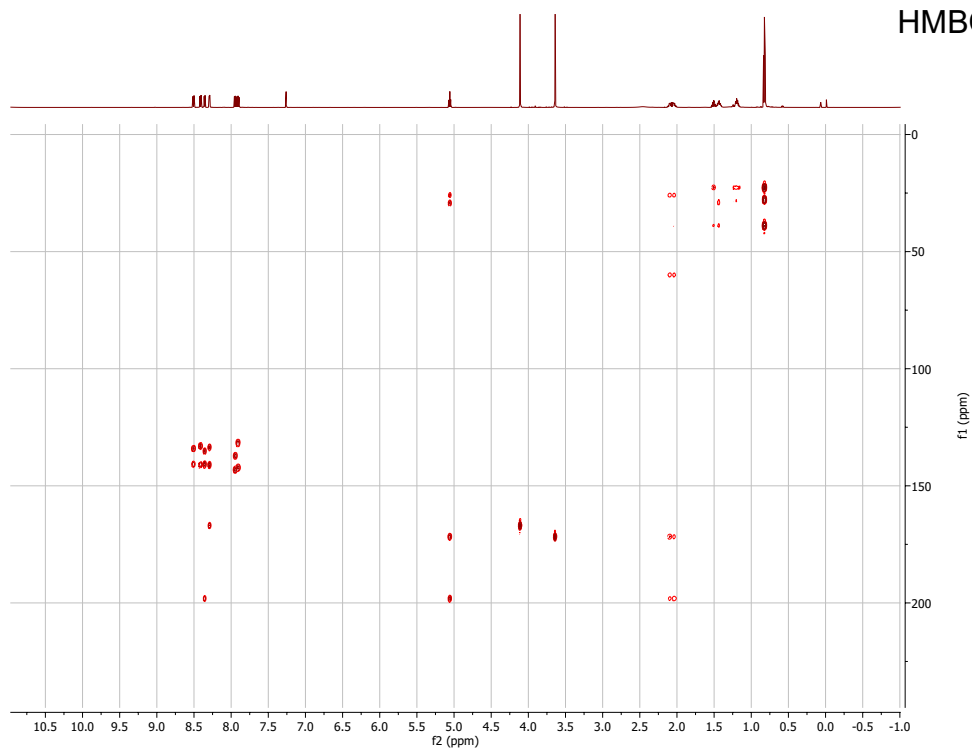

# COSY

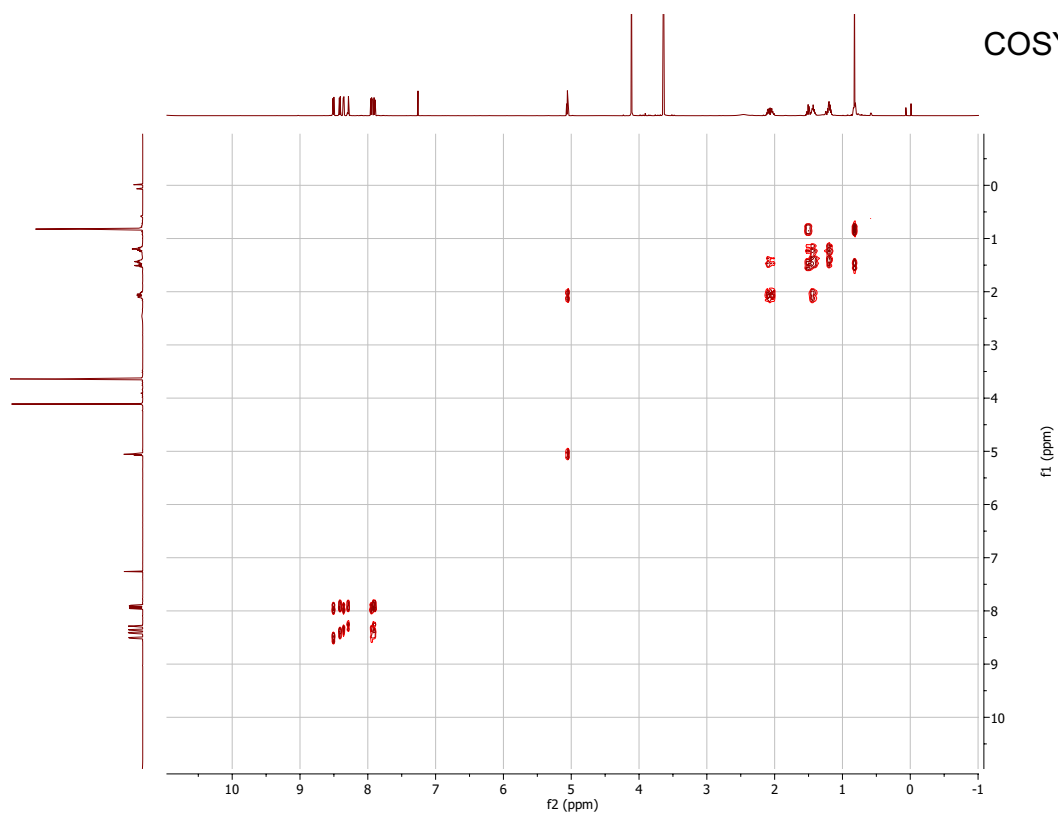

NMR spectroscopic data of compound **10** (oxo-streptophenazine B).

| Position                    | $\delta_c$ | $\delta_H$ mult. (J)               | HMBC                                     | COSY   |
|-----------------------------|------------|------------------------------------|------------------------------------------|--------|
| <b>1</b>                    | 131.6      |                                    |                                          |        |
| <b>2</b>                    | 132.9      | 8.29 dd (1.45, 6.87)               | 4, 10a, <b>1-COOCH<sub>3</sub></b>       | 3      |
| <b>3</b>                    | 129.8      | 7.91 dd (6.97, 8.73)               | 1, 4a                                    | 4, 2   |
| <b>4</b>                    | 133.5      | 8.41 dd (1.46, 8.74)               | 2, 10a                                   | 3      |
| <b>4a</b>                   | 142.1      |                                    |                                          |        |
| <b>5a</b>                   | 140.7      |                                    |                                          |        |
| <b>6</b>                    | 137.1      |                                    |                                          |        |
| <b>7</b>                    | 133.8      | 8.36 dd (1.36, 6.88)               | 1', 9, 5a                                | 8      |
| <b>8</b>                    | 130.2      | 7.94 dd (6.97, 8.69)               | 6, 9a                                    | 9, 7   |
| <b>9</b>                    | 134.9      | 8.51 dd (1.46, 8.77)               | 7, 5a                                    | 8      |
| <b>9a</b>                   | 142.9      |                                    |                                          |        |
| <b>10a</b>                  | 141        |                                    |                                          |        |
| <b>1'</b>                   | 198.3      |                                    |                                          |        |
| <b>2'</b>                   | 59.7       | 5.05 t (7.03, 7.03)                | 4', <b>2'-COOCH<sub>3</sub></b> , 1'     | 3'     |
| <b>3'</b>                   | 29.1       | 2.11, 2.06                         | 4', 2', <b>2'-COOCH<sub>3</sub></b> , 1' | 2', 4' |
| <b>4'</b>                   | 28.1       | 1.44                               | 5', 3', 6', 2'                           | 5'     |
| <b>5'</b>                   | 29.3       | 1.31 dtd (5.47, 7.81, 8.08, 10.35) | 3', 6', 7'                               | 4', 5' |
| <b>6'</b>                   | 31.7       | 1.24                               | 4', 7', 8'                               | 5', 7' |
| <b>7'</b>                   | 22.6       | 1.25                               | 5', 6', 8'                               | 8', 6' |
| <b>8'</b>                   | 14         | 0.83 t (6.93, 6.93)                | 6', 7'                                   | 7'     |
| <b>1-COOCH<sub>3</sub></b>  | 167.1      |                                    |                                          |        |
| <b>1-COOCH<sub>3</sub></b>  | 52.8       | 4.12 s                             | <b>1-COOCH<sub>3</sub></b>               |        |
| <b>2'-COOCH<sub>3</sub></b> | 171.5      |                                    |                                          |        |
| <b>2'-COOCH<sub>3</sub></b> | 52.1       | 3.64, s                            | <b>2'-COOCH<sub>3</sub></b>              |        |

$^1\text{H}$ , HSQC, HMBC, and COSY NMR spectra and key HMBC and COSY correlations of compound **10** (oxo-streptophenazine B).

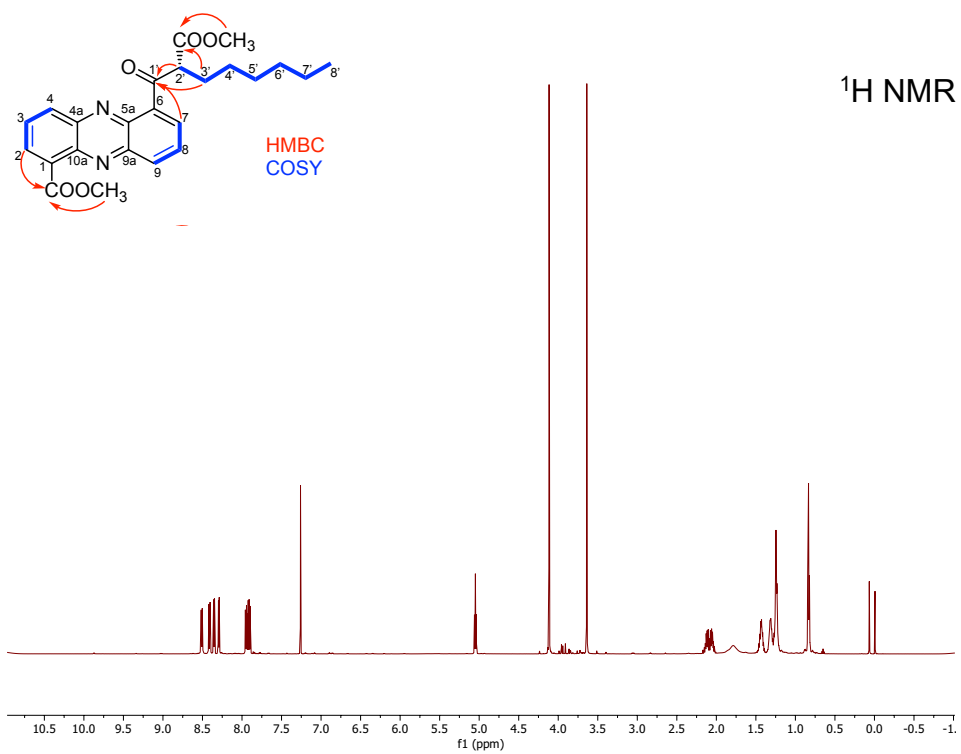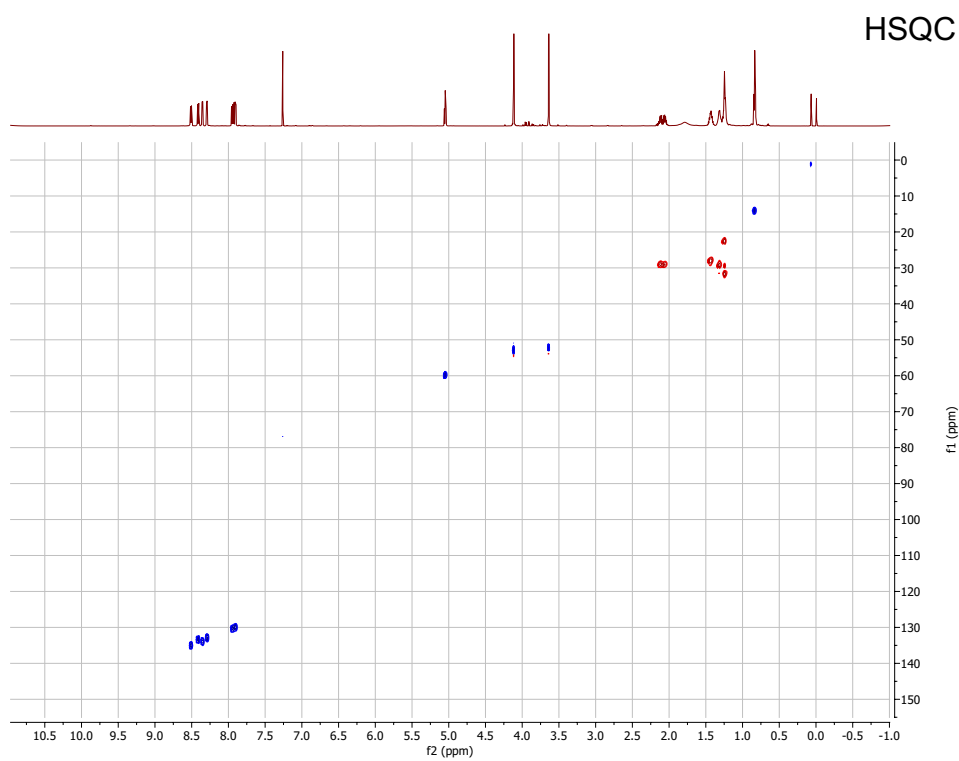

# HMBC

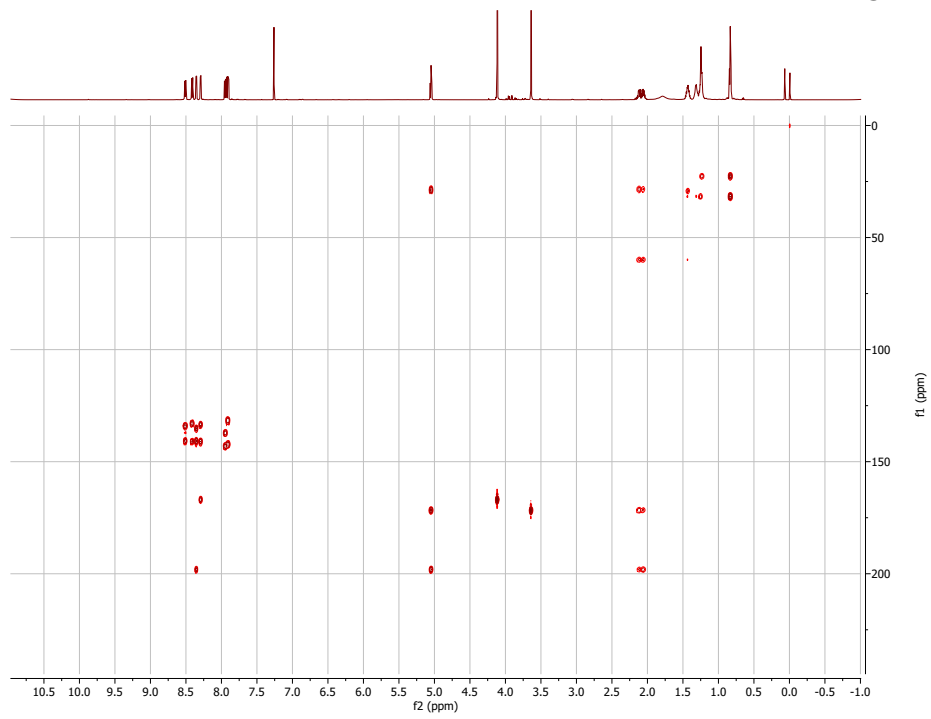

# COSY

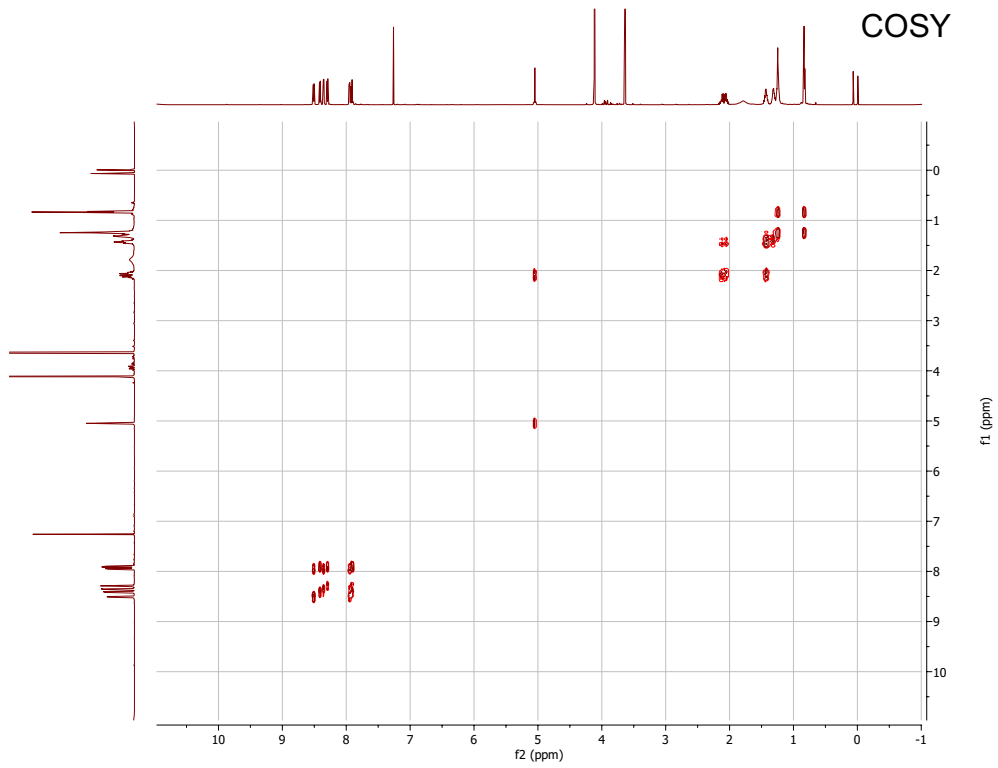

NMR spectroscopic data of compound **11** (oxo-streptophenazine G).

| Position                    | $\delta_c$ | $\delta_H$ mult. (J)         | HMBC                                        | COSY       |
|-----------------------------|------------|------------------------------|---------------------------------------------|------------|
| <b>1</b>                    | 131.2      |                              |                                             |            |
| <b>2</b>                    | 132.89     | 8.29, dd (144, 6.91)         | 4, 10a, <b>1-COOCH<sub>3</sub></b>          | 3          |
| <b>3</b>                    | 129.96     | 7.91, ddd (6.87, 8.72)       | 1, 4a                                       | 2, 4       |
| <b>4</b>                    | 133.36     | 8.41, dd (1.46, 8.71)        | 2, 10a                                      | 3          |
| <b>4a</b>                   | 141.7      |                              |                                             |            |
| <b>5a</b>                   | 140.96     |                              |                                             |            |
| <b>6</b>                    | 137.1      |                              |                                             |            |
| <b>7</b>                    | 133.93     | 8.36, ddd (1.45, 2.82, 6.98) | 9, 5a, 1'                                   | 8          |
| <b>8</b>                    | 130.3      | 7.94, ddd (6.97, 8.72)       | 6, 9a                                       | 7, 9       |
| <b>9</b>                    | 135.11     | 8.51, dd (1.48, 8.67)        | 7, 5a                                       | 8          |
| <b>9a</b>                   | 143.1      |                              |                                             |            |
| <b>10a</b>                  | 141.1      |                              |                                             |            |
| <b>1'</b>                   | 198.2      |                              |                                             |            |
| <b>2'</b>                   | 60.01      | 5.06, td, (2.10, 7.04, 7.04) | 4', 3', <b>2'-COOCH<sub>3</sub></b> , 1'    | 3'         |
| <b>3'</b>                   | 29.31      | 2.08, 2.05                   | 4', 5', 2', <b>2'-COOCH<sub>3</sub></b> , 1 | 2', 4'     |
| <b>4'</b>                   | 25.51      | 1.44, m                      | 6', 5', 2', 3'                              | 3', 5'     |
| <b>5'</b>                   | 36.25      | 1.13 1.32                    | 8', 9', 4', 3', 6'                          | 4', 6', 9' |
| <b>6'</b>                   | 34.2       | 1.29                         | 9', 7', 4'                                  | 9', 5', 7' |
| <b>7'</b>                   | 29.41      | 1.08, 1.28                   | 5', 6', 9'                                  | 5', 6', 8' |
| <b>8'</b>                   | 11.36      | 0.81                         | 5', 6', 7', 8'                              | 7'         |
| <b>9'</b>                   | 19.21      | 0.79                         | 5', 6', 7'                                  | 6'         |
| <b>1-COOCH<sub>3</sub></b>  | 167.3      |                              |                                             |            |
| <b>1-COOCH<sub>3</sub></b>  | 52.8       | 4.11, s                      | <b>1-COOCH<sub>3</sub></b>                  | -          |
| <b>2'-COOCH<sub>3</sub></b> | 171.8      |                              |                                             |            |
| <b>2'-COOCH<sub>3</sub></b> | 52.1       | 3.64, d (0.99)               | <b>2'-COOCH<sub>3</sub></b>                 | -          |

$^1\text{H}$ , HSQC, HMBC, and COSY NMR spectra and key HMBC and COSY correlations of compound **11** (oxo-streptophenazine G).

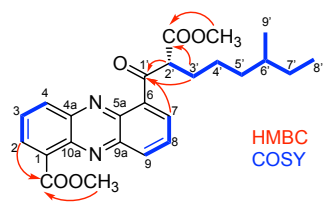

$^1\text{H}$  NMR

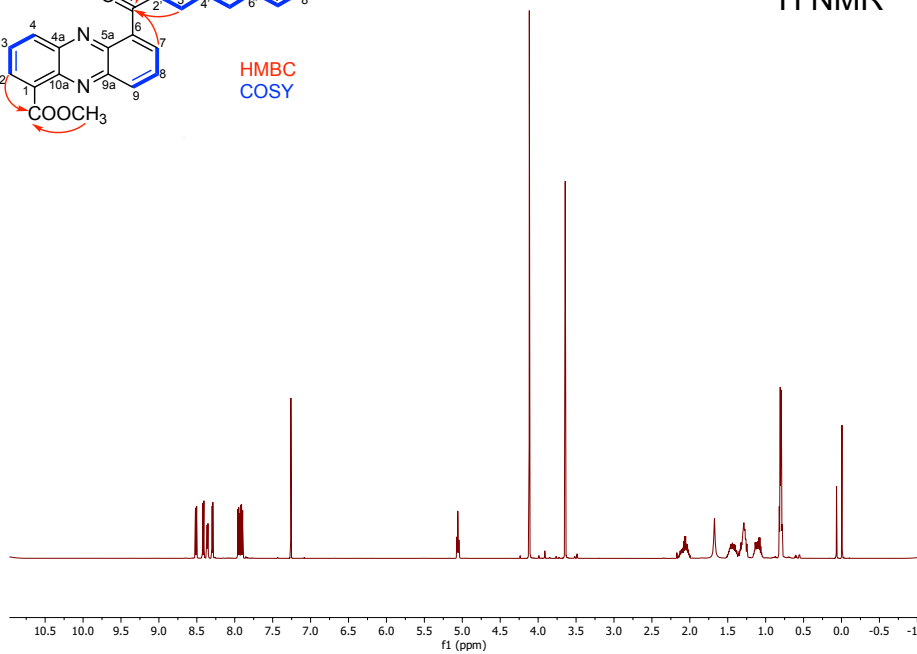

HSQC

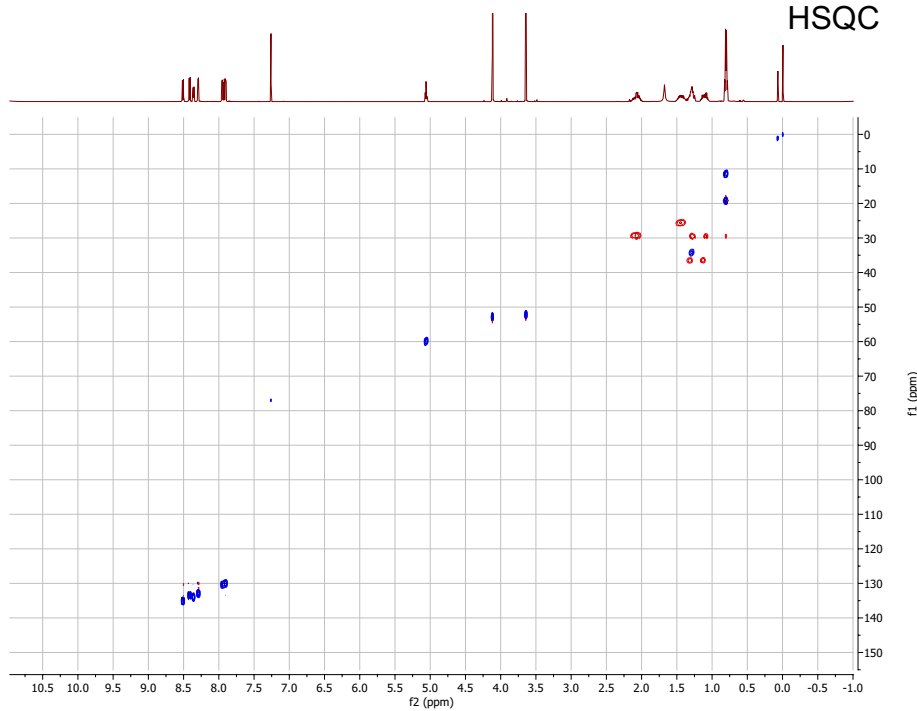



# HMBC

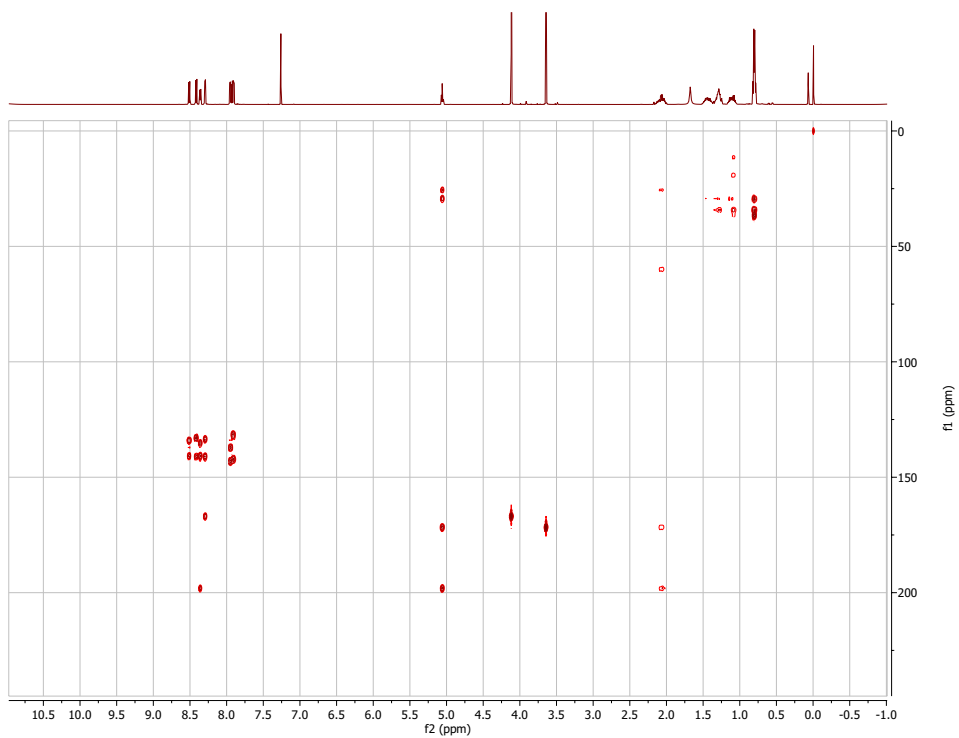

# COSY

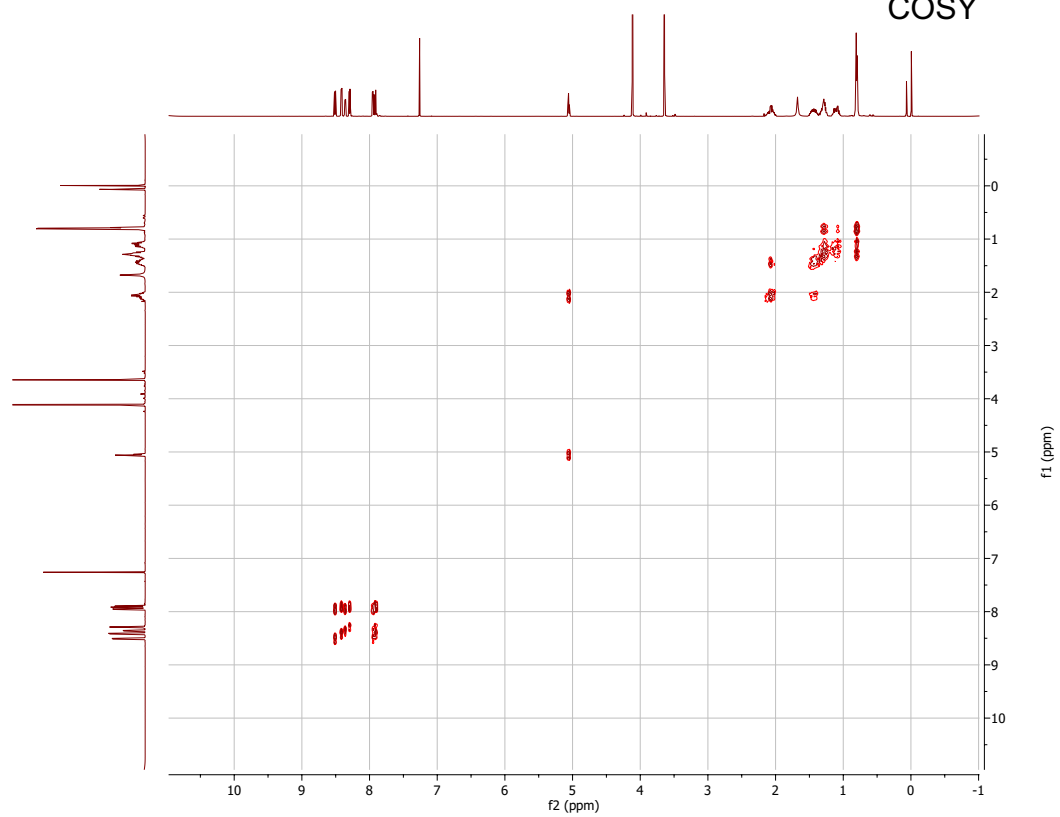

NMR spectroscopic data of compound **12** (oxo-streptophenazine F).

| Position                    | $\delta_c$ | $\delta_H$ mult. (J)        | HMBC                                    | COSY   |
|-----------------------------|------------|-----------------------------|-----------------------------------------|--------|
| <b>1</b>                    | 131.6      |                             |                                         |        |
| <b>2</b>                    | 132.9      | 8.29, dd (1.43, 6.93)       | 4, 10a, <b>1-COOCH<sub>3</sub></b>      | 3      |
| <b>3</b>                    | 129.96     | 7.91, dd (6.89, 8.74)       | 1, 4a                                   | 2, 4   |
| <b>4</b>                    | 133.4      | 8.41, dd (1.42, 8.77)       | 2, 10a                                  | 3      |
| <b>4a</b>                   | 142.3      |                             |                                         |        |
| <b>5a</b>                   | 140.9      |                             |                                         |        |
| <b>6</b>                    | 136.9      |                             |                                         |        |
| <b>7</b>                    | 133.9      | 8.36, dd (1.45, 6.95)       | 9, 5a, 1'                               | 8      |
| <b>8</b>                    | 130.3      | 7.94, dd (6.94, 8.69)       | 6, 9a                                   | 7, 9   |
| <b>9</b>                    | 135.1      | 8.51, dd (1.45, 8.67)       | 7, 5a                                   | 8      |
| <b>9a</b>                   | 143        |                             |                                         |        |
| <b>10a</b>                  | 140.6      |                             |                                         |        |
| <b>1'</b>                   | 198.2      |                             |                                         |        |
| <b>2'</b>                   | 59.9       | 5.05, t (7.02, 7.02)        | 4', 3', 1', <b>2'-COOCH<sub>3</sub></b> | 3'     |
| <b>3'</b>                   | 29         | 2.09, m                     | 1', 2', 5', <b>2'-COOCH<sub>3</sub></b> | 2', 4' |
| <b>4'</b>                   | 28.2       | 1.41                        | 2', 3', 6'                              | 3', 5' |
| <b>5'</b>                   | 27.4       | 1.3                         | 6', 7'                                  | 4', 6' |
| <b>6'</b>                   | 38.6       | 1.14 dt (6.94, 6.94, 8.37)  | 8', 9'), 4'                             | 5', 7' |
| <b>7'</b>                   | 27.9       | 1.48 dt (6.73, 6.73, 13.50) | 8', 9', 5', 6'                          | 6', 8' |
| <b>8'</b>                   | 22.5       | 0.82 dd (4.02, 6.61)        | 9', 7', 6'                              | 7'     |
| <b>9'</b>                   | 22.5       | 0.82 dd (4.02, 6.61)        | 8', 7', 6'                              | 7'     |
| <b>1-COOCH<sub>3</sub></b>  | 167.2      |                             |                                         |        |
| <b>1-COOCH<sub>3</sub></b>  | 52.8       | 4.12, s                     | <b>1-COOCH<sub>3</sub></b>              |        |
| <b>2'-COOCH<sub>3</sub></b> | 171.8      |                             |                                         |        |
| <b>2'-COOCH<sub>3</sub></b> | 52.1       | 3.64, s                     | <b>2'-COOCH<sub>3</sub></b>             |        |

$^1\text{H}$ , HSQC, HMBC, and COSY NMR and key HMBC and COSY correlations of compound **12** (oxo-streptophenazine F).

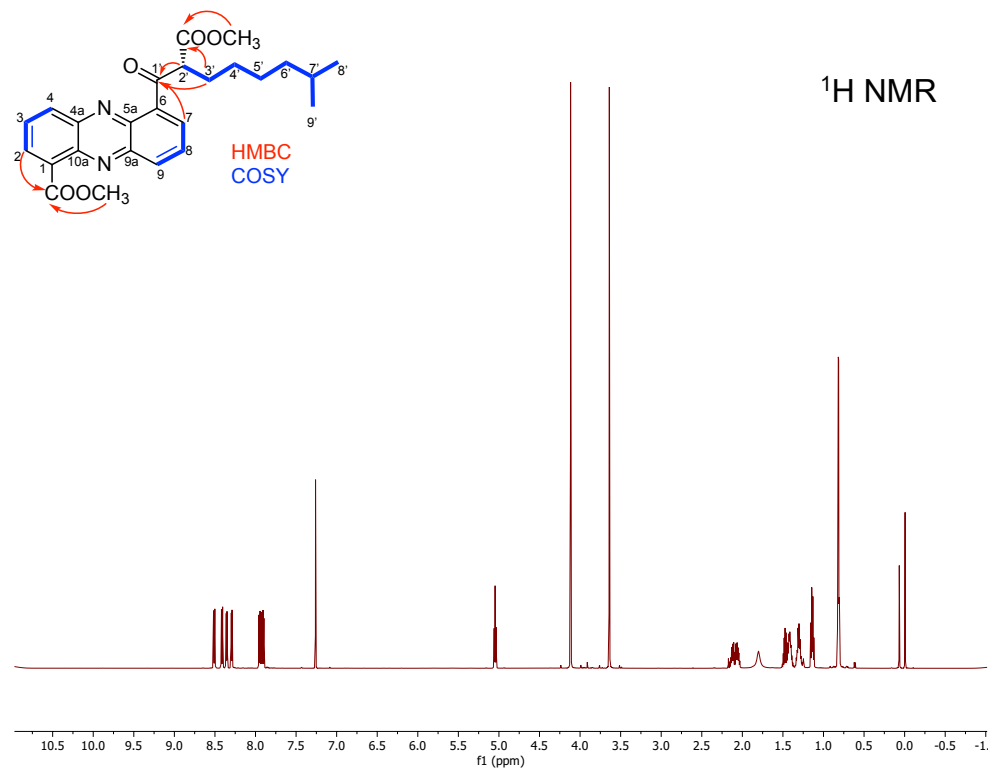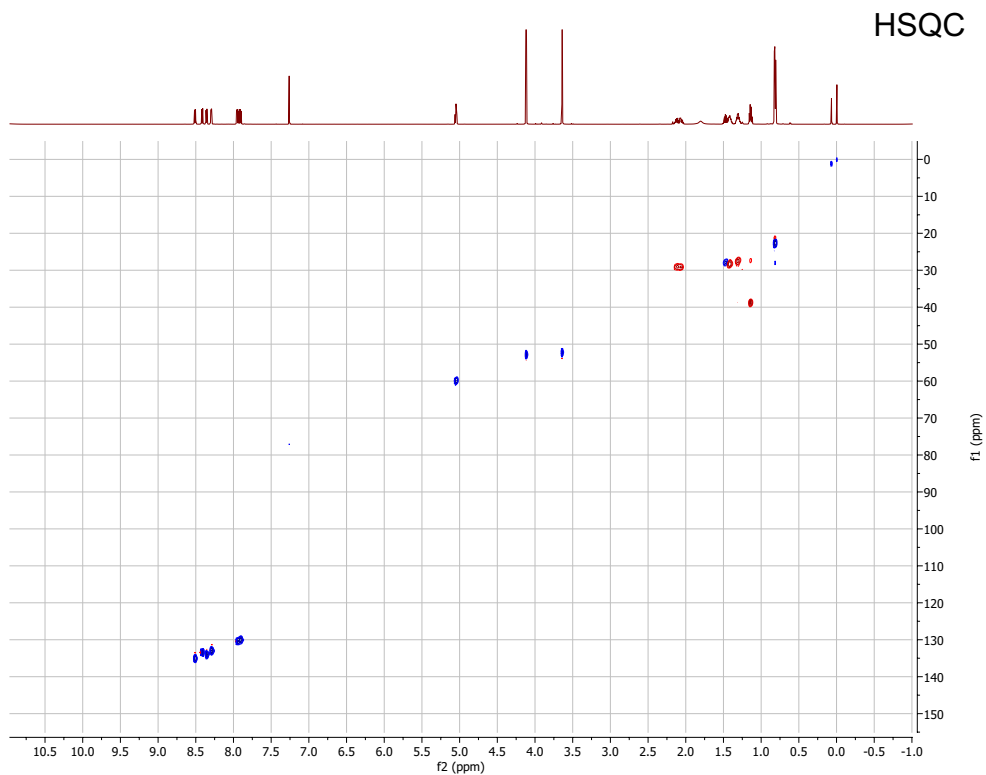

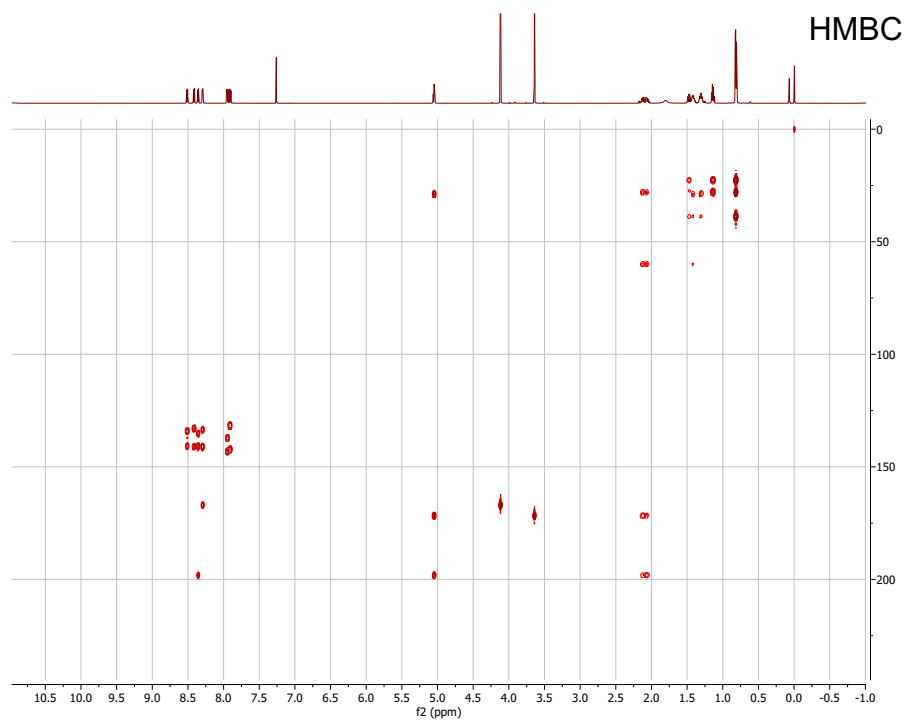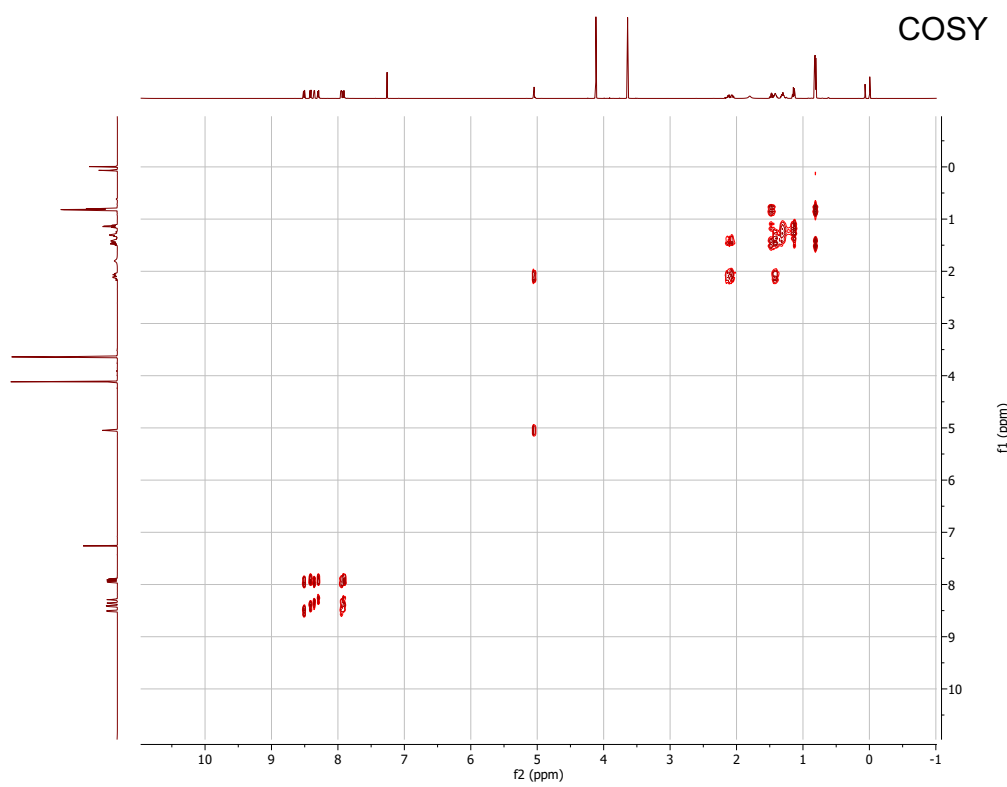

NMR spectroscopic data of compound **13** (streptophenazine C).

| Position                    | $\delta_c$ | $\delta_H$ mult. (J)         | HMBC                                       | COSY      |
|-----------------------------|------------|------------------------------|--------------------------------------------|-----------|
| <b>1</b>                    | 124.93     |                              |                                            |           |
| <b>2</b>                    | 137.59     | 9.01, dd (1.43, 7.06)        | 4, 10a, <b>1-COOH</b>                      | 3,        |
| <b>3</b>                    | 130.69     | 8.07, dd (7.06, 8.71)        | 1, 4a                                      | 2, 4      |
| <b>4</b>                    | 134.89     | 8.54, dd (1.44, 8.66)        | 2, 10a                                     | 3         |
| <b>4a</b>                   | 142        |                              |                                            |           |
| <b>5a</b>                   | 142.2      |                              |                                            |           |
| <b>6</b>                    | 140.6      |                              |                                            |           |
| <b>7</b>                    | 129.68     | 7.95, m                      | 1', 9, 5a                                  | 8         |
| <b>8</b>                    | 132.98     | 8.0, m                       | 6, 9a                                      | 7, 9      |
| <b>9</b>                    | 127.58     | 8.23, ddd (1.53, 5.44, 8.49) | 5a, 7                                      | 8         |
| <b>9a</b>                   | 140.0      |                              |                                            |           |
| <b>10a</b>                  | 140.62     |                              |                                            |           |
| <b>1'</b>                   | 73.38      | 5.73 dt (7.2, 7.2, 38.29)    | 3', 2', 7, 5a, <b>2'-COOCH<sub>3</sub></b> | 2'        |
| <b>2'</b>                   | 52.25      | 3.37, m                      | 3', 4', 1', <b>2'-COOCH<sub>3</sub></b>    | 1', 3'    |
| <b>3'</b>                   | 30.12      | 1.48 and 1.82                | 1', 2', 5', <b>2'-COOCH<sub>3</sub></b>    | 4'        |
| <b>4'</b>                   | 27.1       | 1.34                         | 2', 6'                                     | 3', 5'    |
| <b>5'</b>                   | 38.7       | 1.1                          | 7'/8', 3'                                  | 4', 6'    |
| <b>6'</b>                   | 27.8       | 1.43                         | 7'/8', 3', 5'                              | 7'/8', 5' |
| <b>7'</b>                   | 22.37      | 0.78, d (6.61)               | 8', 6', 5'                                 | 6'        |
| <b>8'</b>                   | 22.37      | 0.78, d (6.61)               | 7', 6', 5'                                 | 6'        |
| <b>1-COOH</b>               | 166.85     |                              |                                            |           |
| <b>2'-COOCH<sub>3</sub></b> | 175.98     |                              |                                            |           |
| <b>2'-COOCH<sub>3</sub></b> | 51.74      | 3.63 and 3.56                | <b>2'-COOCH<sub>3</sub></b>                |           |

$^1\text{H}$ , HSQC, HMBC, and COSY NMR spectra and key HMBC and COSY correlations of compound **13** (streptophenazine C).

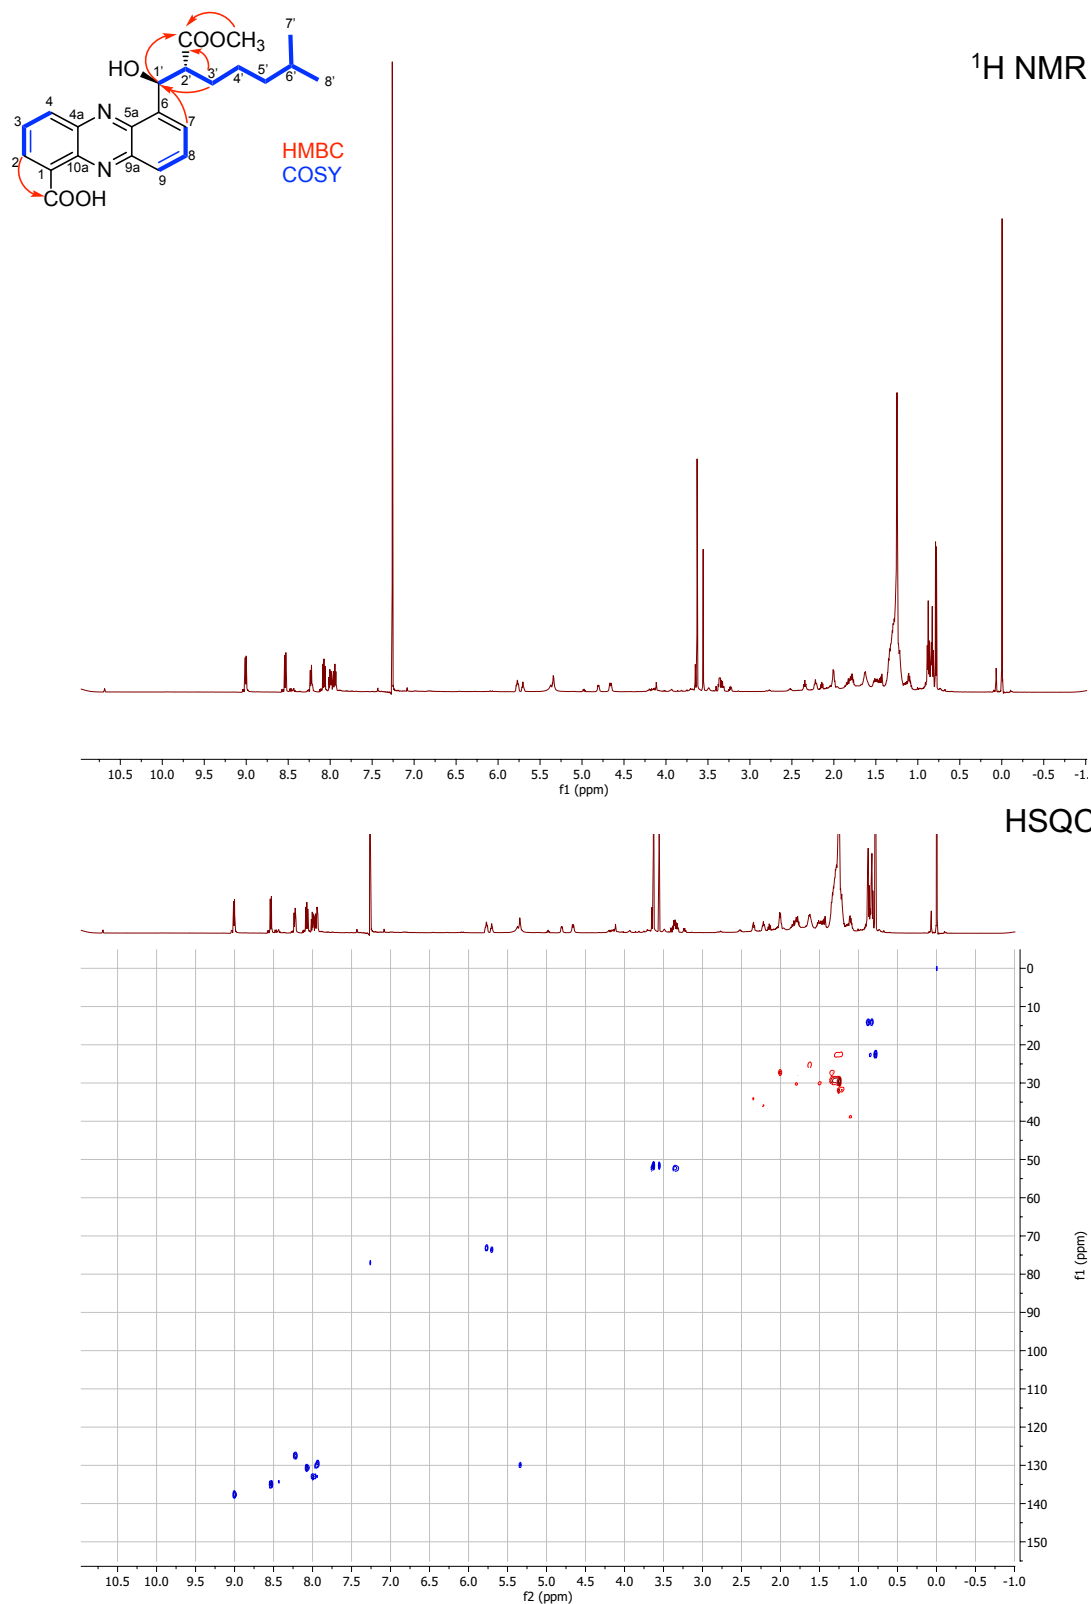

# HMBC

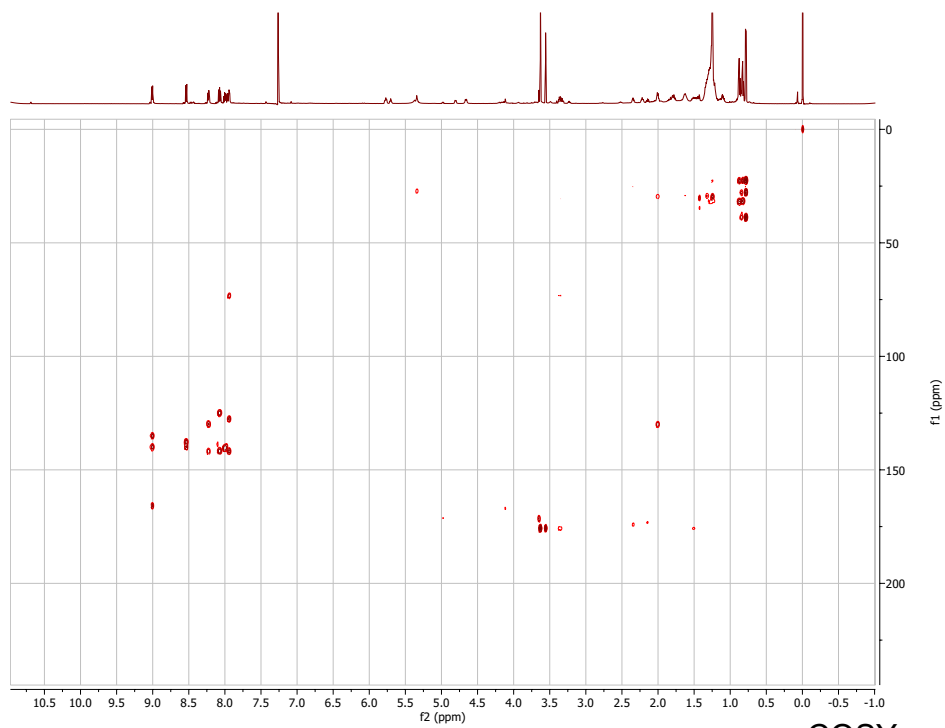

# COSY

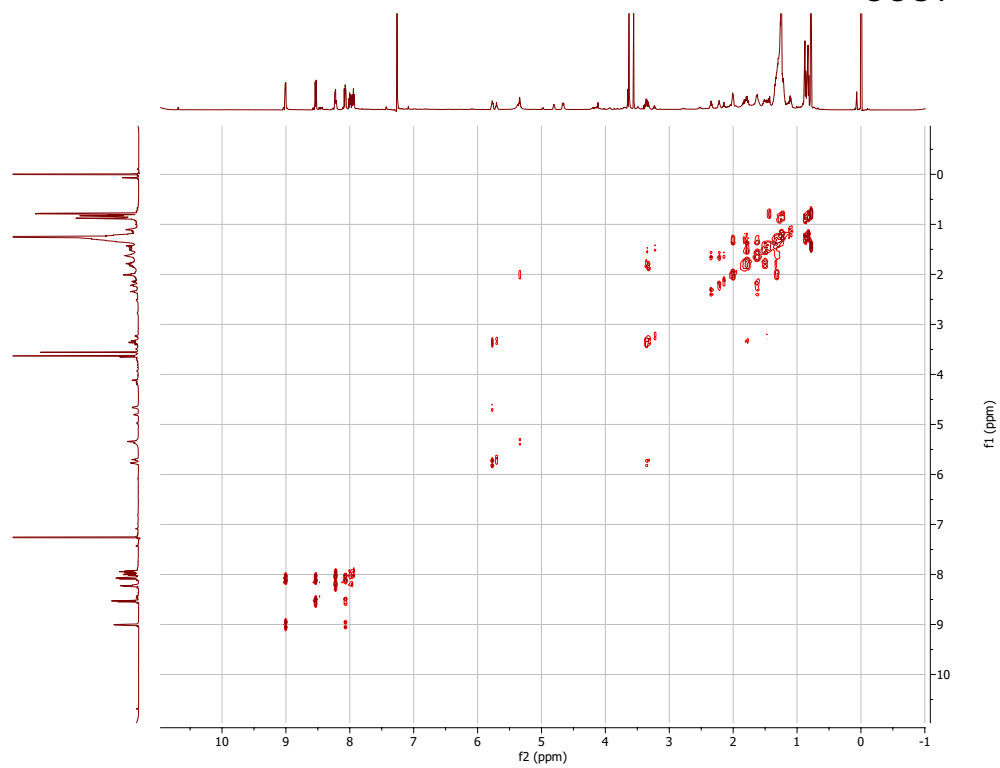

NMR spectroscopic data of compound **14** (streptophenazine D).

| Position                    | $\delta_C$ | $\delta_H$ mult. (J)                     | HMBC                                        | COSY      |
|-----------------------------|------------|------------------------------------------|---------------------------------------------|-----------|
| <b>1</b>                    | 131.22     |                                          |                                             |           |
| <b>2</b>                    | 132.36     | 8.26, m                                  | 4, 10a, <b>1-COOCH<sub>3</sub></b>          | 3         |
| <b>3</b>                    | 129.46     | 7.89, dd (6.90, 8.67)                    | 1, 4a                                       | 2, 4      |
| <b>4</b>                    | 133.39     | 8.38, dd (1.44, 8.70)                    | 2, 10a                                      | 3         |
| <b>4a</b>                   | 140.86     |                                          |                                             |           |
| <b>5a</b>                   | 140.93     |                                          |                                             |           |
| <b>6</b>                    | 139.04     |                                          |                                             |           |
| <b>7</b>                    | 129.43     | 7.78, d (6.72)                           | 1', 5a, 9                                   | 8         |
| <b>8</b>                    | 130.48     | 7.85, dd (6.77, 8.71)                    | 6, 9a                                       | 7, 9      |
| <b>9</b>                    | 130.03     | 8.27, m                                  | 7, 5a                                       | 8         |
| <b>9a</b>                   | 144.27     |                                          |                                             |           |
| <b>10a</b>                  | 140.68     |                                          |                                             |           |
| <b>1'</b>                   | 75.29      | 5.57, d (7.53)                           | 3', 2, 5a, 7, <b>2'-COOCH<sub>3</sub></b>   | 2'        |
| <b>2'</b>                   | 53.02      | 3.33, ddd (5.03, 7.49, 9.87)             | 3', 4', 1', <b>2'-COOCH<sub>3</sub></b>     | 1', 3'    |
| <b>3'</b>                   | 28.91      | 1.71 dtd (6.34, 9.3, 10.00, 13.43), 1.32 | 1', 2', 4', 5', <b>2'-COOCH<sub>3</sub></b> | 2', 4'    |
| <b>4'</b>                   | 36.22      | 1.13                                     | 2', 3', 5', 6'/7'                           | 3', 5'    |
| <b>5'</b>                   | 27.85      | 1.42                                     | 3', 4', 6'/7'                               | 6'/7', 4' |
| <b>6'</b>                   | 22.37      | 0.76 dd (1.66, 6.64)                     | 4', 5', 7'                                  | 5'        |
| <b>7'</b>                   | 22.37      | 0.76                                     | 4', 5', 6'                                  | 5'        |
| <b>1-COOCH<sub>3</sub></b>  | 167.1      |                                          | <b>1-COOCH<sub>3</sub></b>                  |           |
| <b>1-COOCH<sub>3</sub></b>  | 52.57      | 4.12, s                                  |                                             |           |
| <b>2'-COOCH<sub>3</sub></b> | 175.69     | -                                        |                                             |           |
| <b>2'-COOCH<sub>3</sub></b> | 51.56      | 3.66, s                                  | <b>2'-COOCH<sub>3</sub></b>                 |           |



$^1\text{H}$ , HSQC, HMBC, and COSY NMR spectra and key HMBC and COSY correlations of compound **14** (streptophenazine D).

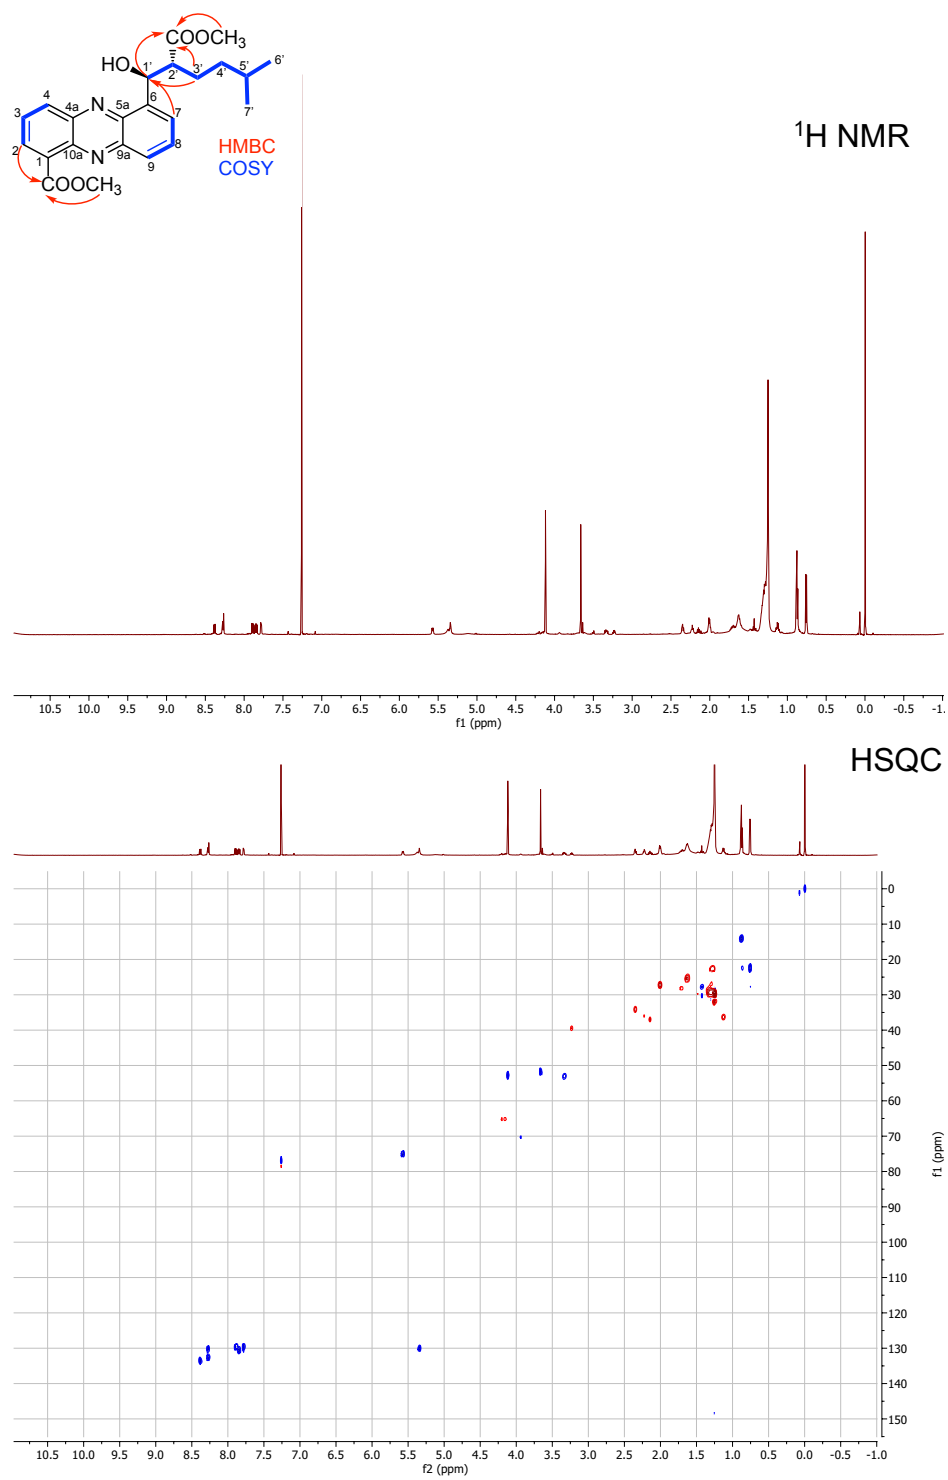

# HMBC

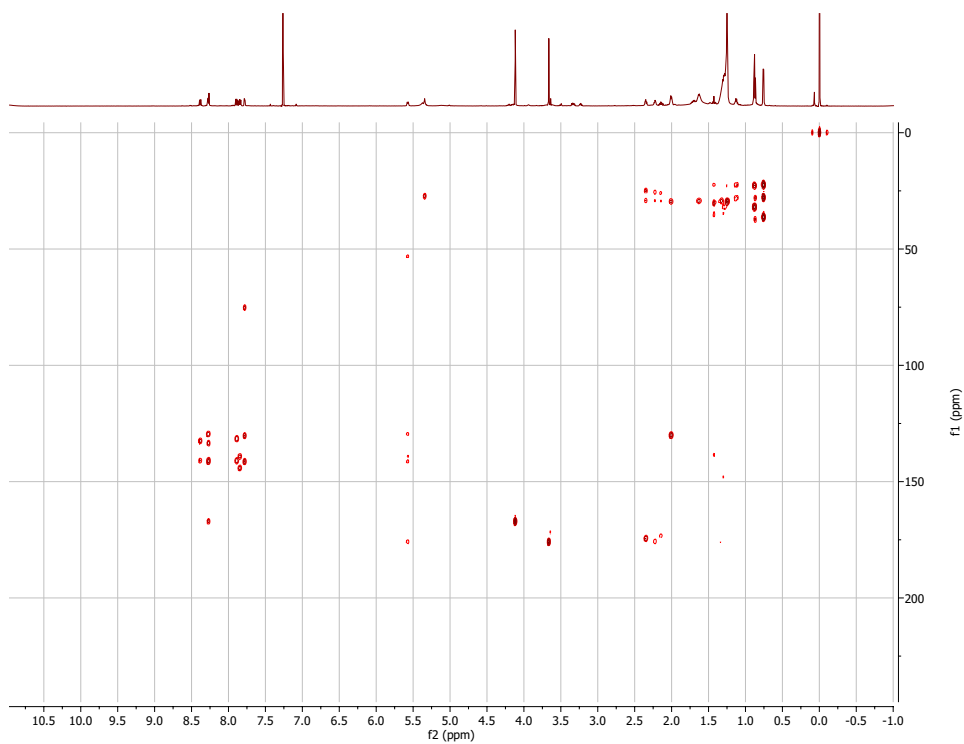

# COSY

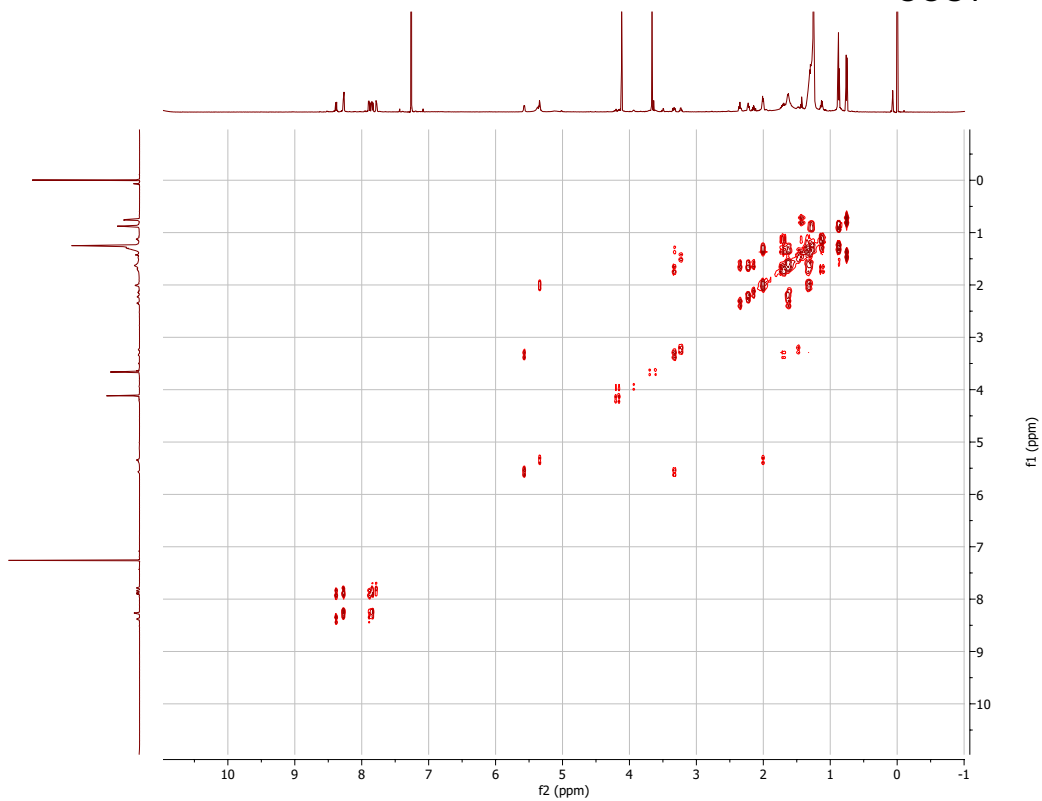

NMR spectroscopic data of compound **15** (streptophenazine P).

| Position                    | $\delta_c$ | $\delta_H$ mult. (J)         | HMBC                                          | COSY   |
|-----------------------------|------------|------------------------------|-----------------------------------------------|--------|
| <b>1</b>                    | 132        |                              |                                               |        |
| <b>2</b>                    | 132.2      | 8.27, t (1.71, 1.76))        | 4, 10a, <b>1-COOCH<sub>3</sub></b>            | 3      |
| <b>3</b>                    | 129.1      | 7.88, dd (6.90, 8.73)        | 1, 4a                                         | 2, 4   |
| <b>4</b>                    | 133.4      | 8.39, dd (1.42, 8.67)        | 2, 10a                                        | 3      |
| <b>4a</b>                   | 141        |                              |                                               |        |
| <b>5a</b>                   | 141.4      |                              |                                               |        |
| <b>6</b>                    | 138.9      |                              |                                               |        |
| <b>7</b>                    | 129.33     | 7.77, d (6.76)               | 1', 5a, 9                                     | 8      |
| <b>8</b>                    | 130.4      | 7.85, dd (6.79, 8.74)        | 6, 9a                                         | 7, 9   |
| <b>9</b>                    | 130.1      | 8.28, dd (1.40, 3.88)        | 7, 5a                                         | 8      |
| <b>9a</b>                   | 144.08     |                              |                                               |        |
| <b>10a</b>                  | 141        |                              |                                               |        |
| <b>1'</b>                   | 75.1       | 5.56, d (7.63)               | 2', 3', 7, 5a, 9, <b>2'-COOCH<sub>3</sub></b> | 2'     |
| <b>2'</b>                   | 52.9       | 3.36, ddd (4.41, 7.37, 9.95) | 3', 4', 1', <b>2'-COOCH<sub>3</sub></b>       | 1', 3' |
| <b>3'</b>                   | 29.4       | 1.68 and 1.29                | 1', 2', 5', <b>2'-COOCH<sub>3</sub></b>       | 2', 4' |
| <b>4'</b>                   | 29.7       | 1.3                          |                                               | 3', 5' |
| <b>5'</b>                   | 31.8       | 1.25                         | 3', 7'                                        | 4', 6' |
| <b>6'</b>                   | 22.37      | 1.18                         | 5'                                            | 5', 7' |
| <b>7'</b>                   | 14.01      | 0.79, t (7.04, 7.04)         | 6', 5'                                        | 6'     |
| <b>1-COOCH<sub>3</sub></b>  | 167.3      |                              |                                               |        |
| <b>1-COOCH<sub>3</sub></b>  | 52.7       | 4.12, s                      | <b>1-COOCH<sub>3</sub></b>                    |        |
| <b>2'-COOCH<sub>3</sub></b> | 175.6      |                              |                                               |        |
| <b>2'-COOCH<sub>3</sub></b> | 51.7       | 3.67                         | <b>2'-COOCH<sub>3</sub></b>                   |        |

$^1\text{H}$ , HSQC, HMBC, and COSY NMR spectra and key HMBC and COSY correlations of compound **15** (streptophenazine P).

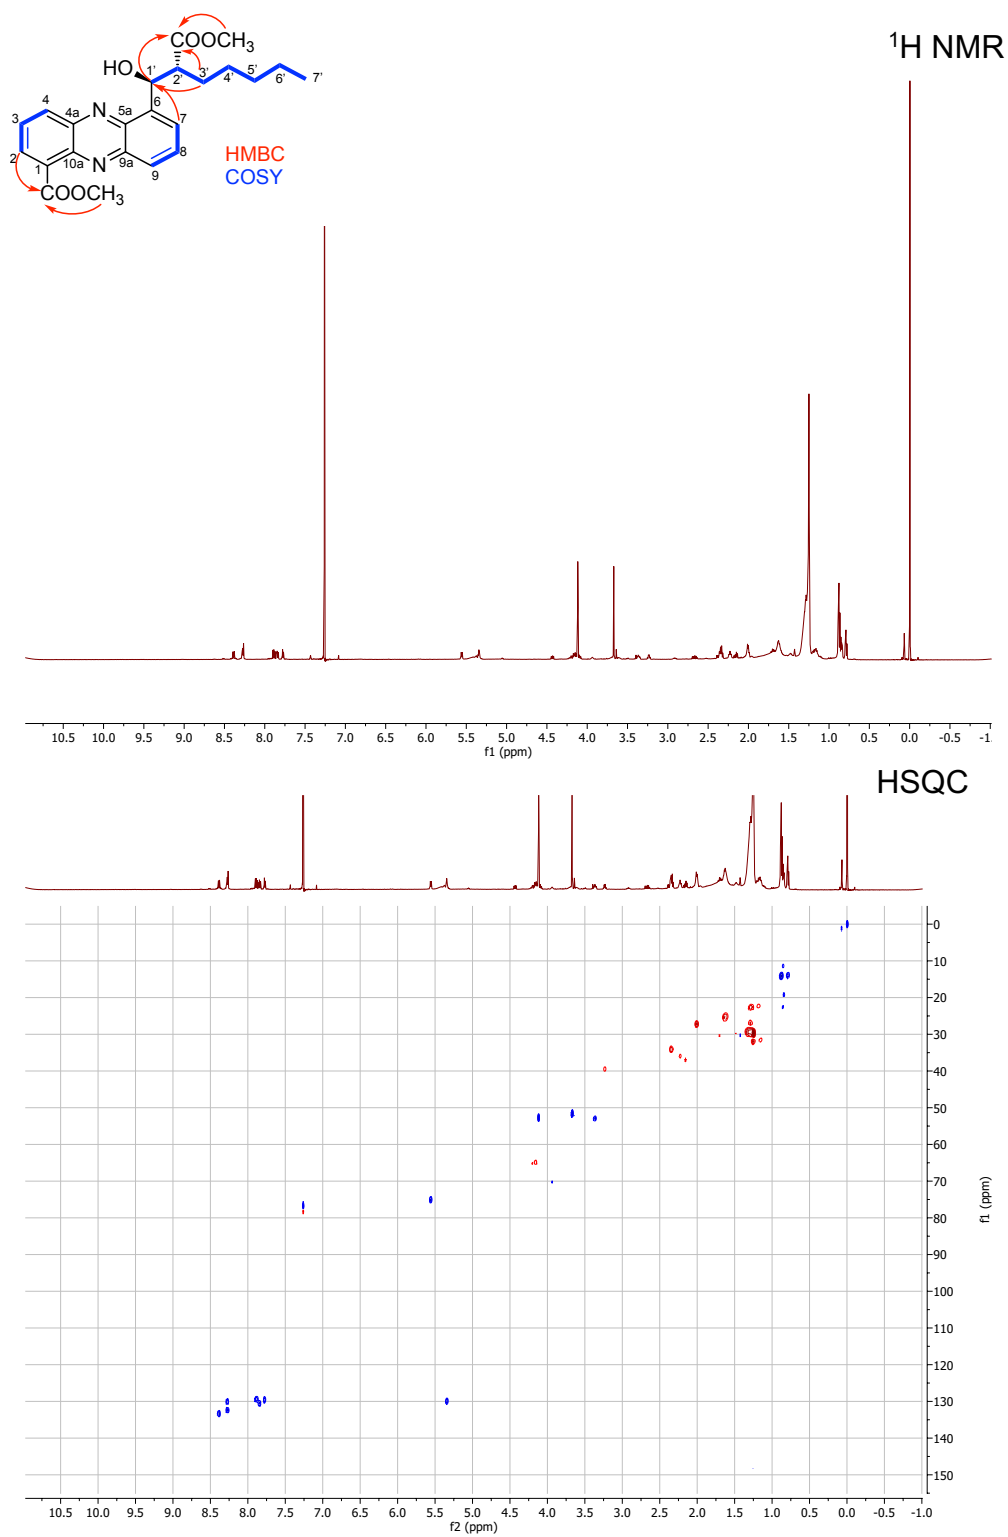

# HMBC

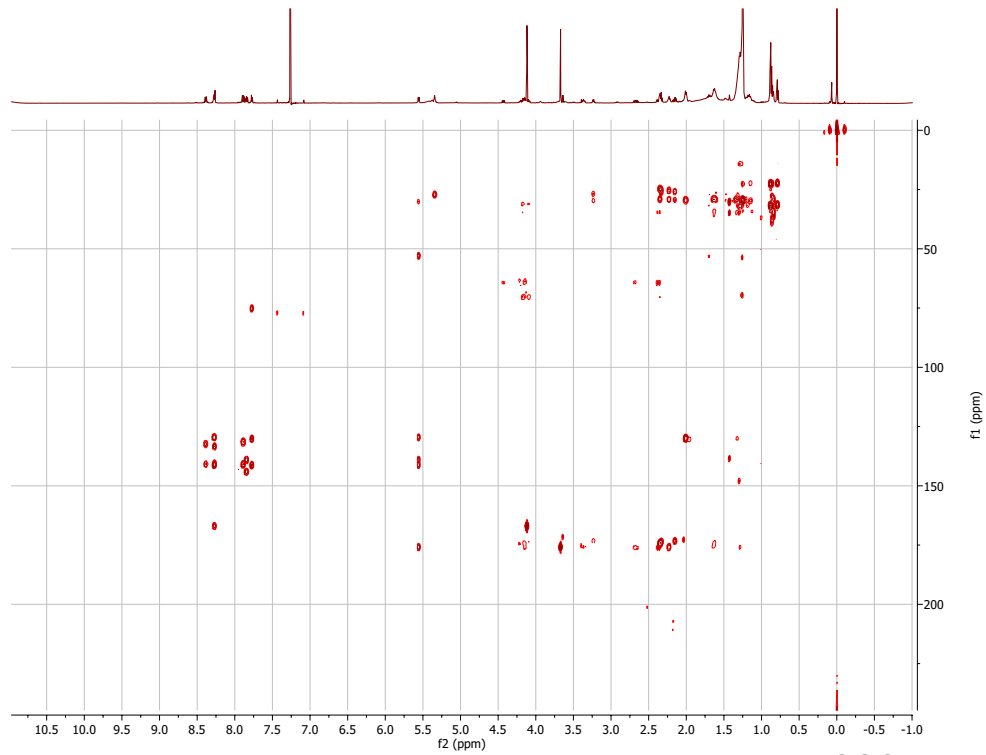

# COSY

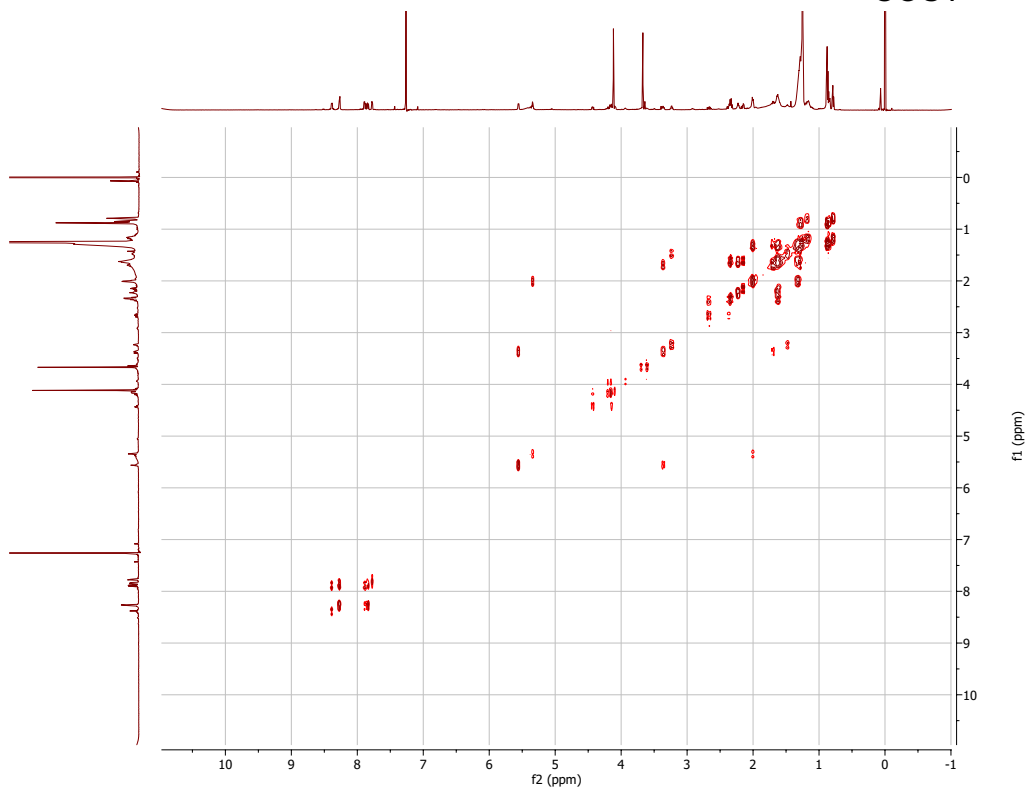

NMR spectroscopic data of compound **16** (streptophenazine A).

| Position                    | $\delta_c$ | $\delta_H$ mult. (J)                     | HMBC                                        | COSY      |
|-----------------------------|------------|------------------------------------------|---------------------------------------------|-----------|
| <b>1</b>                    | 131.5      |                                          |                                             |           |
| <b>2</b>                    | 132.5      | 8.24, t (1.35, 1.35)                     | 4, 10a, <b>1-COOCH<sub>3</sub></b>          | 3         |
| <b>3</b>                    | 129.4      | 7.84, dd (6.91, 8.72)                    | 1, 4a                                       | 2, 4      |
| <b>4</b>                    | 133.5      | 8.34, dd (1.46, 8.71)                    | 2, 10a                                      | 3         |
| <b>4a</b>                   | 141.1      |                                          |                                             |           |
| <b>5a</b>                   | 140.9      |                                          |                                             |           |
| <b>6</b>                    | 138.9      |                                          |                                             |           |
| <b>7</b>                    | 129.35     | 7.75, dt (1.07, 1.07, 6.79)              | 1', 5a, 9                                   | 8         |
| <b>8</b>                    | 130.7      | 7.81, dd (6.80, 8.72)                    | 6, 9a                                       | 7, 9      |
| <b>9</b>                    | 129.9      | 8.23, d (1.45)                           | 7, 5a                                       | 8         |
| <b>9a</b>                   | 144        |                                          |                                             |           |
| <b>10a</b>                  | 140.6      |                                          |                                             |           |
| <b>1'</b>                   | 74.99      | 5.55, d (7.68)                           | 2', 3', 5a, 7, <b>2'-COOCH<sub>3</sub></b>  | 2'        |
| <b>2'</b>                   | 52.95      | 3.35, m                                  | 1', 3', 4', 6, <b>2'-COOCH<sub>3</sub></b>  | 1', 3'    |
| <b>3'</b>                   | 30.34      | 1.24, 1.66                               | 1', 2', 4', 5', <b>2'-COOCH<sub>3</sub></b> | 2', 4'    |
| <b>4'</b>                   | 24.9       | 1.18                                     | 2', 6'                                      | 5', 3'    |
| <b>5'</b>                   | 38.6       | 1.01 tddd (2.53, 5.20, 6.91, 9.28, 9.28) | 3', 4', 7'/8'                               | 4', 6'    |
| <b>6'</b>                   | 27.8       | 1.4, dt (6.66, 6.66, 13.31)              | 5', 7'                                      | 7'/8', 5' |
| <b>7'</b>                   | 22.37      | 0.75, dd (2.13, 6.66)                    | 7'/8', 6', 5'                               | 6'        |
| <b>8'</b>                   | 22.37      | 0.75, dd (2.13, 6.66)                    | 7'/8', 6', 5'                               | 6'        |
| <b>1-COOCH<sub>3</sub></b>  | 166.9      |                                          |                                             |           |
| <b>1-COOCH<sub>3</sub></b>  | 52.3       | 4.10, s                                  | <b>1-COOCH<sub>3</sub></b>                  | -         |
| <b>2'-COOCH<sub>3</sub></b> | 175.7      |                                          |                                             |           |
| <b>2'-COOCH<sub>3</sub></b> | 51.68      | 3.66, s                                  | <b>2'-COOCH<sub>3</sub></b>                 | -         |

$^1\text{H}$ , HSQC, HMBC, and COSY NMR spectra and key HMBC and COSY correlations of compound **16** (streptophenazine A).

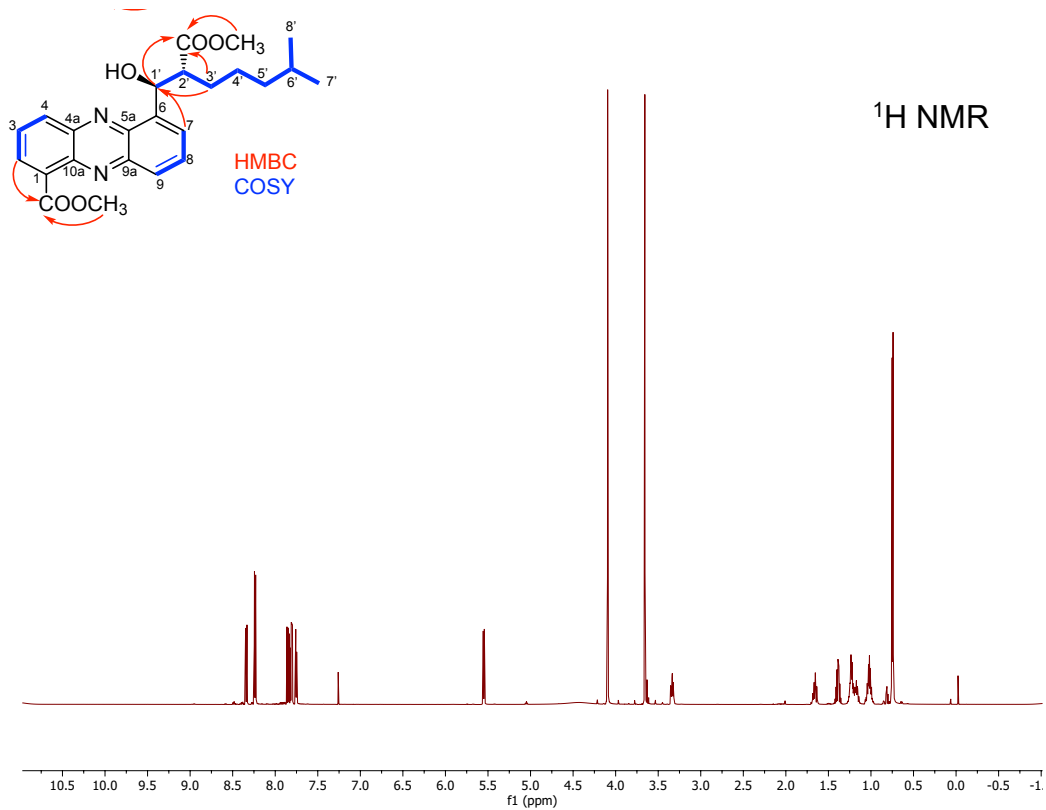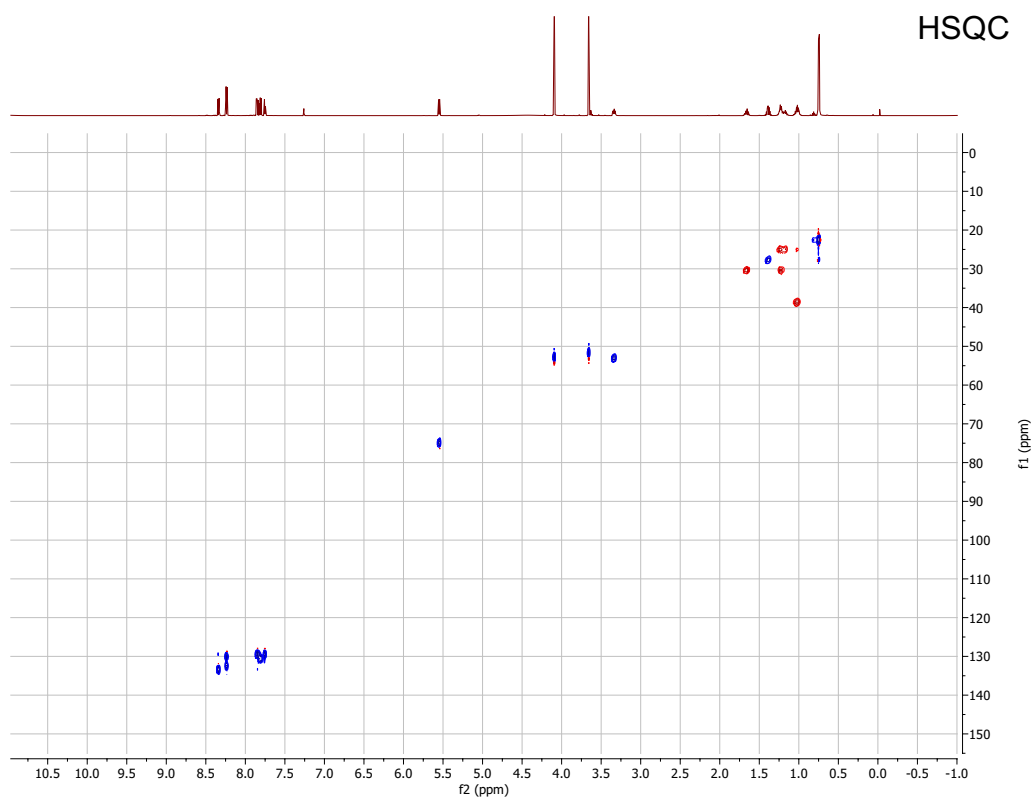

# HMBC

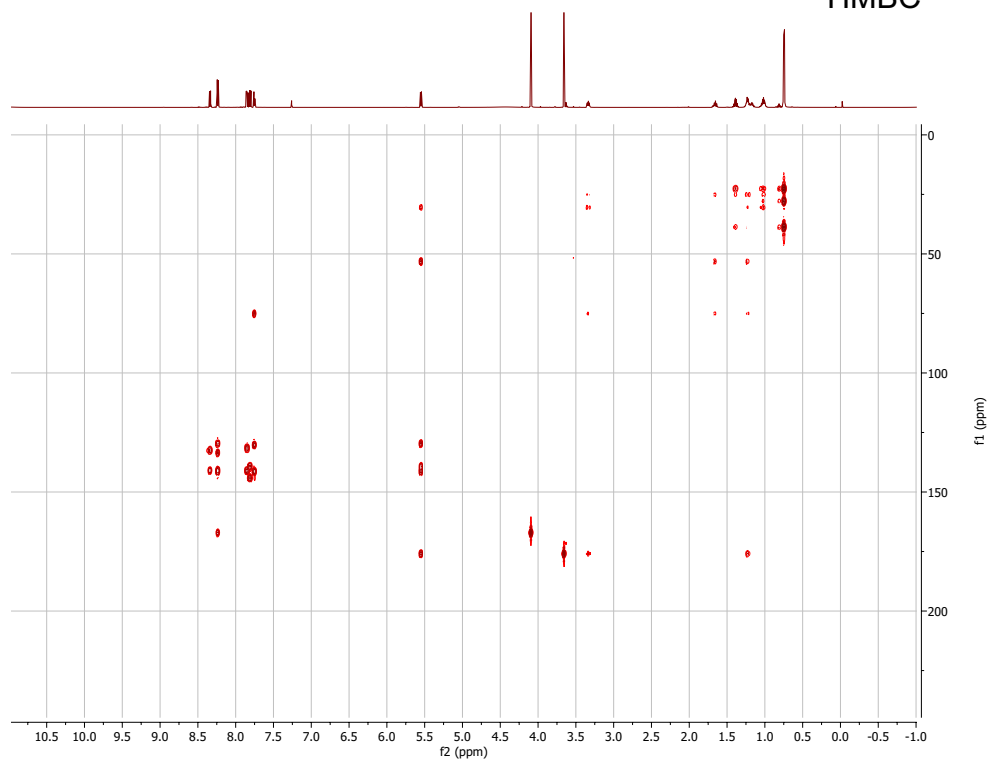

# COSY

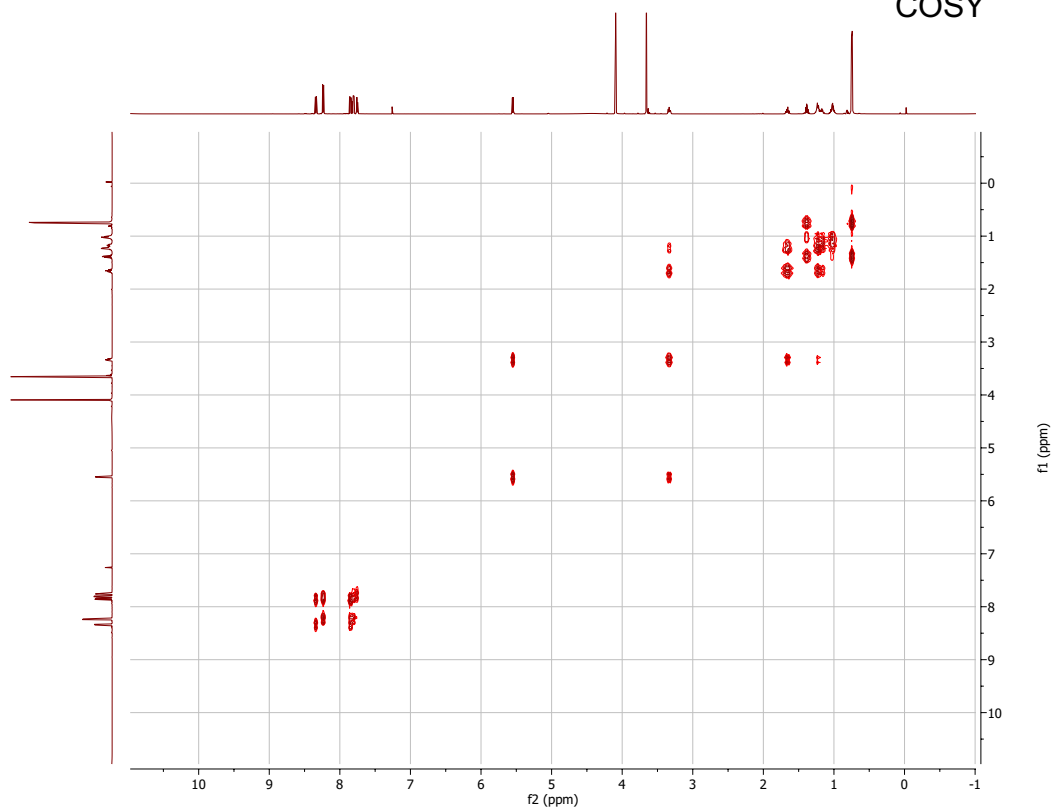



NMR spectroscopic data of compound **17** (streptophenazine B).

| Position                    | $\delta_c$ | $\delta_H$ mult. (J)                                                       | HMBC                                          | COSY   |
|-----------------------------|------------|----------------------------------------------------------------------------|-----------------------------------------------|--------|
| <b>1</b>                    | 131.9      |                                                                            |                                               |        |
| <b>2</b>                    | 132.4      | 8.26 dd (1.44, 6.96)                                                       | 4, 10a, <b>1-COOCH<sub>3</sub></b>            | 3      |
| <b>3</b>                    | 129.5      | 7.88 dd (6.90, 8.71)                                                       | 1, 4a                                         | 2, 4   |
| <b>4</b>                    | 133.2      | 8.36 dd (1.45, 8.71)                                                       | 2, 10a                                        | 3      |
| <b>4a</b>                   | 140.5      |                                                                            |                                               |        |
| <b>5a</b>                   | 141.4      |                                                                            |                                               |        |
| <b>6</b>                    | 138.2      |                                                                            |                                               |        |
| <b>7</b>                    | 129.7      | 7.74, dt (1.10, 1.10, 6.75)                                                | 1', 5a, 9                                     | 8      |
| <b>8</b>                    | 130.5      | 7.8 dd (6.80, 8.76)                                                        | 6, 9a                                         | 7, 9   |
| <b>9</b>                    | 130.0      | 8.24 dd (1.43, 8.73)                                                       | 7, 5a                                         | 8      |
| <b>9a</b>                   | 144.1      |                                                                            |                                               |        |
| <b>10a</b>                  | 140.7      |                                                                            |                                               |        |
| <b>1'</b>                   | 75.8       | 5.43 d (7.75)                                                              | 2', 3', 5a, 6, 7, <b>2'-COOCH<sub>3</sub></b> | 2'     |
| <b>2'</b>                   | 53.4       | 3.30, m                                                                    | 1', 4', 6, <b>2'-COOCH<sub>3</sub></b>        | 1', 3' |
| <b>3'</b>                   | 28.7       | 1.85 dtd (4.09, 10.54, 10.63, 14.25) and 1.95 tdd (2.39, 5.51, 9.30, 9.30) | 1', 2', 5', <b>2'-COOCH<sub>3</sub></b>       | 2', 4' |
| <b>4'</b>                   | 28.2       | 1.15-1.3                                                                   | 2', 6'                                        | 3', 5' |
| <b>5'</b>                   | 28.2       | 1.15-1.3                                                                   | 3', 7'                                        | 6'     |
| <b>6'</b>                   | 31.5       | 1.15-1.3                                                                   | 4', 8'                                        | 5', 7' |
| <b>7'</b>                   | 22.4       | 1.15-1.3                                                                   | 5', 6'                                        | 6', 8' |
| <b>8'</b>                   | 14.13      | 0.84 t (7.0)                                                               | 6', 7'                                        | 7'     |
| <b>1-COOCH<sub>3</sub></b>  | 167.2      |                                                                            |                                               |        |
| <b>1-COOCH<sub>3</sub></b>  | 52.8       | 4.11 s                                                                     | <b>1-COOCH<sub>3</sub></b>                    | -      |
| <b>2'-COOCH<sub>3</sub></b> | 175.4      |                                                                            |                                               |        |
| <b>2'-COOCH<sub>3</sub></b> | 51.4       | 3.40, s                                                                    | <b>2'-COOCH<sub>3</sub></b>                   | -      |

$^1\text{H}$ , HSQC, HMBC, and COSY NMR spectra and key HMBC and COSY correlations of compound **17** (streptophenazine B).

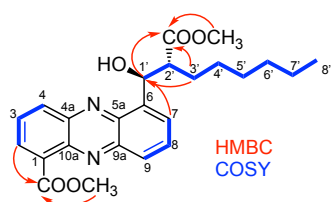

$^1\text{H}$  NMR

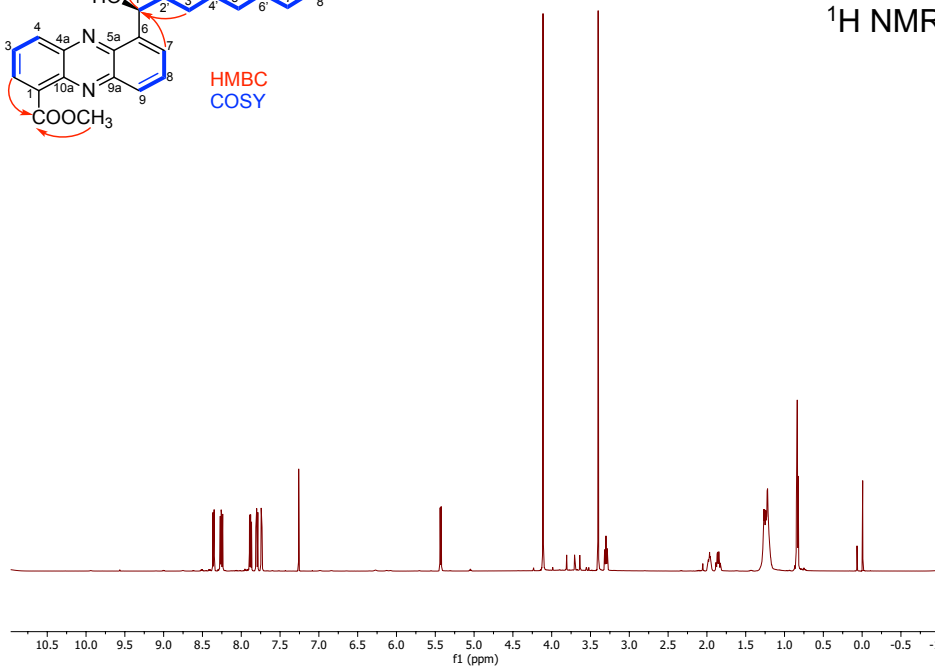

HSQC

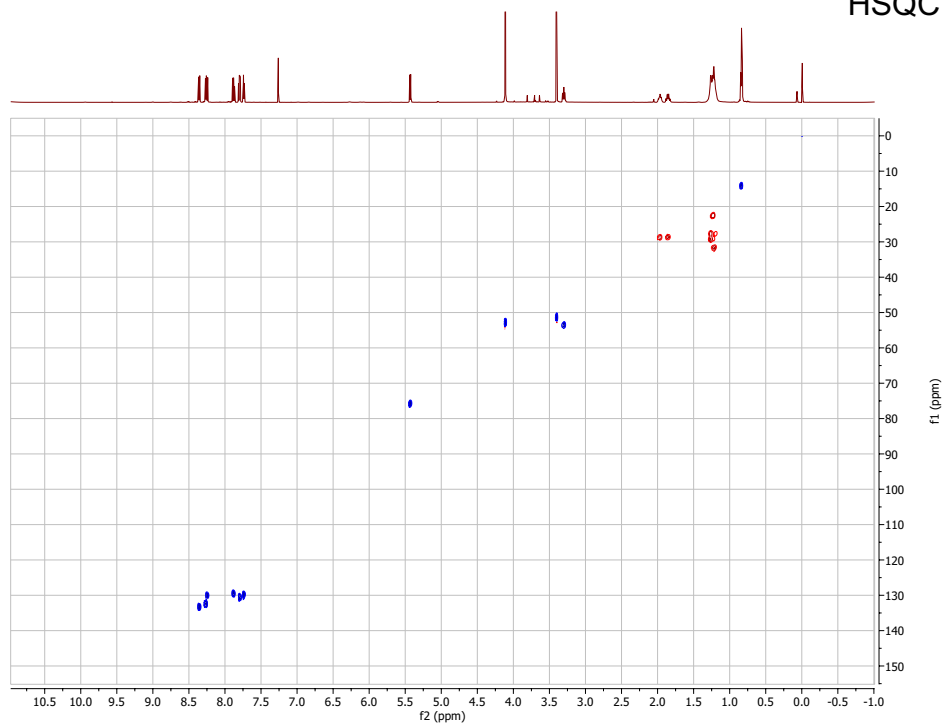

# HMBC

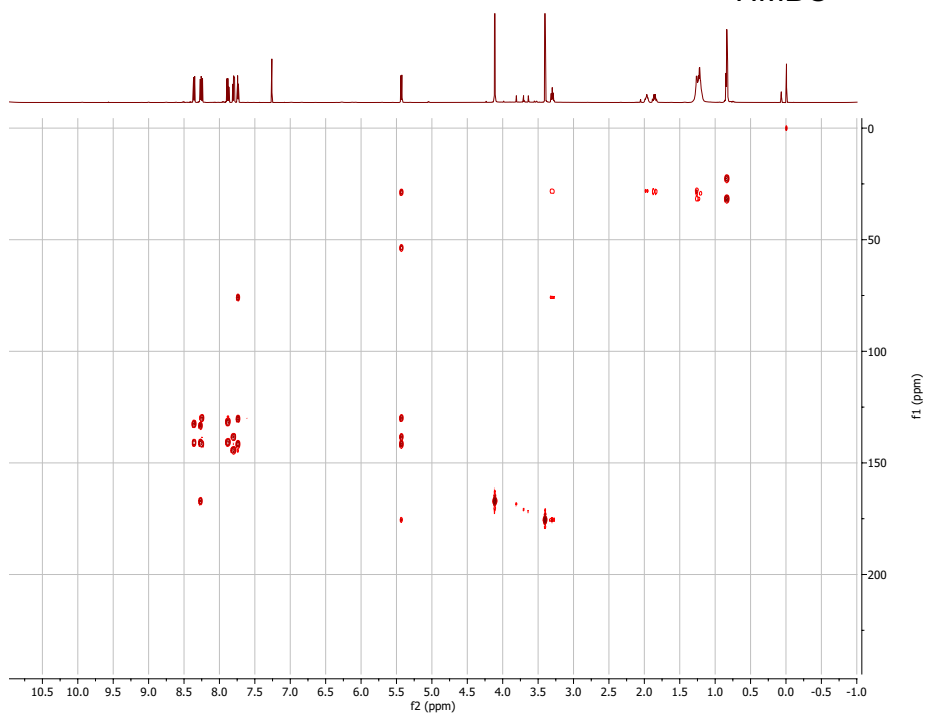

# COSY

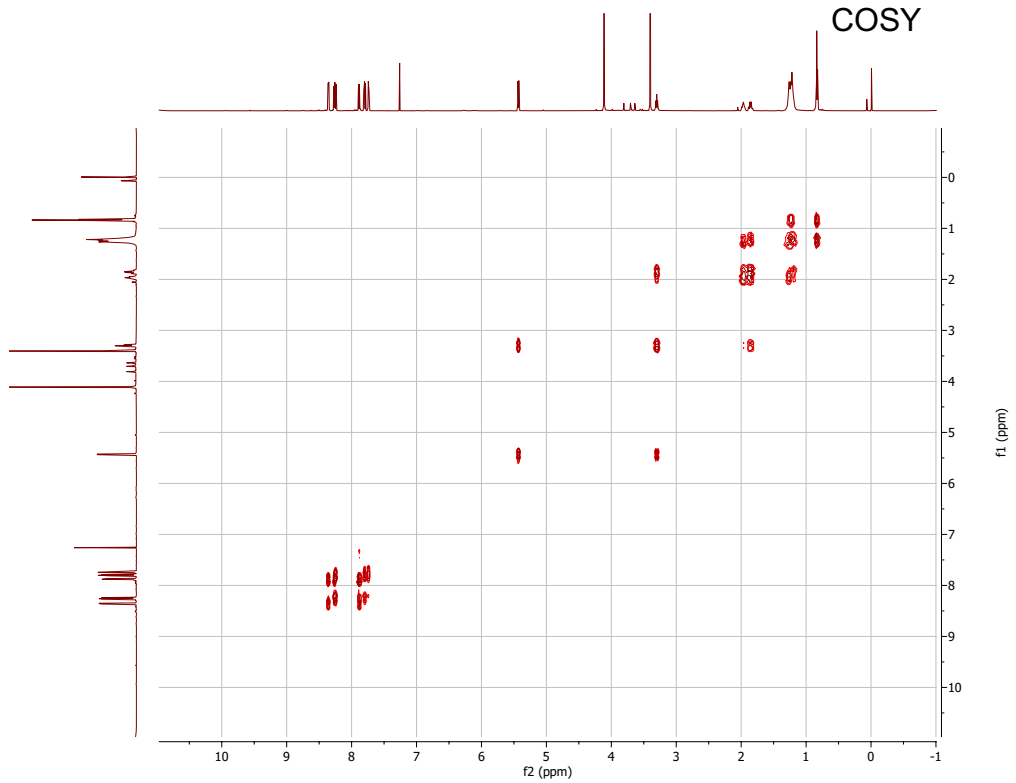

NMR spectroscopic data of compound **18** (streptophenazine G).

| Position                    | $\delta_c$ | $\delta_H$ mult. (J)                         | HMBC                                        | COSY       |
|-----------------------------|------------|----------------------------------------------|---------------------------------------------|------------|
| <b>1</b>                    | 131.6      |                                              |                                             |            |
| <b>2</b>                    | 132.4      | 8.26, t (1.43, 1.43)                         | 4, 10a, <b>1-COOCH<sub>3</sub></b>          | 3          |
| <b>3</b>                    | 129.5      | 7.85, dd (6.92, 8.71)                        | 1, 4a                                       | 2, 4       |
| <b>4</b>                    | 133.3      | 8.36, dd (1.43, 8.70)                        | 2, 10a                                      | 3          |
| <b>4a</b>                   | 140.7      |                                              |                                             |            |
| <b>5a</b>                   | 141.05     |                                              |                                             |            |
| <b>6</b>                    | 139.2      |                                              |                                             |            |
| <b>7</b>                    | 129.5      | 7.76, dt (1.11, 1.11, 6.71)                  | 1', 5a, 9                                   | 8          |
| <b>8</b>                    | 130.5      | 7.83, dd (6.77, 8.75)                        | 6, 9a                                       | 7, 9       |
| <b>9</b>                    | 129.9      | 8.25, d (1.43)                               | 7, 5a                                       | 8          |
| <b>9a</b>                   | 144.1      |                                              |                                             |            |
| <b>10a</b>                  | 141.1      |                                              |                                             |            |
| <b>1'</b>                   | 75.1       | 5.54, d (7.82)                               | 2', 3', 5a, 7, <b>2'-COOCH<sub>3</sub></b>  |            |
| <b>2'</b>                   | 53.1       | 3.35, ddd (3.9, 7.61, 9.73)                  | 1', 3', 4', <b>2'-COOCH<sub>3</sub></b>     | 3', 1'     |
| <b>3'</b>                   | 30.5       | 1.21 and 1.68                                | 1', 2', 4', 5', <b>2'-COOCH<sub>3</sub></b> | 2', 4'     |
| <b>4'</b>                   | 24.8       | 1.2                                          | 2', 3', 6'                                  | 3', 5'     |
| <b>5'</b>                   | 36.15      | 0.94, dtd (3.07, 4.93, 6.22, 10.72) and 1.15 | 3', 4', 6', 7'                              | 4', 6'     |
| <b>6'</b>                   | 34.2       | 1.17                                         | 4', 8', 9'                                  | 5', 7', 9' |
| <b>7'</b>                   | 29.56      | 1.02 and 1.19                                | 5', 6', 8', 9'                              | 6', 8'     |
| <b>8'</b>                   | 11.37      | 0.74, m                                      | 5', 6', 7'                                  | 6', 7'     |
| <b>9'</b>                   | 19.08      | 0.72, m                                      | 5', 6', 7'                                  | 6', 7'     |
| <b>1-COOCH<sub>3</sub></b>  | 167.2      |                                              |                                             |            |
| <b>1-COOCH<sub>3</sub></b>  | 52.7       | 4.1, s                                       | <b>1-COOCH<sub>3</sub></b>                  |            |
| <b>2'-COOCH<sub>3</sub></b> | 175.8      |                                              |                                             |            |
| <b>2'-COOCH<sub>3</sub></b> | 51.6       | 3.67, s                                      | <b>2'-COOCH<sub>3</sub></b>                 |            |

$^1\text{H}$ , HSQC, HMBC, and COSY NMR spectra key HMBC and COSY correlations of compound **18** (streptophenazine G).

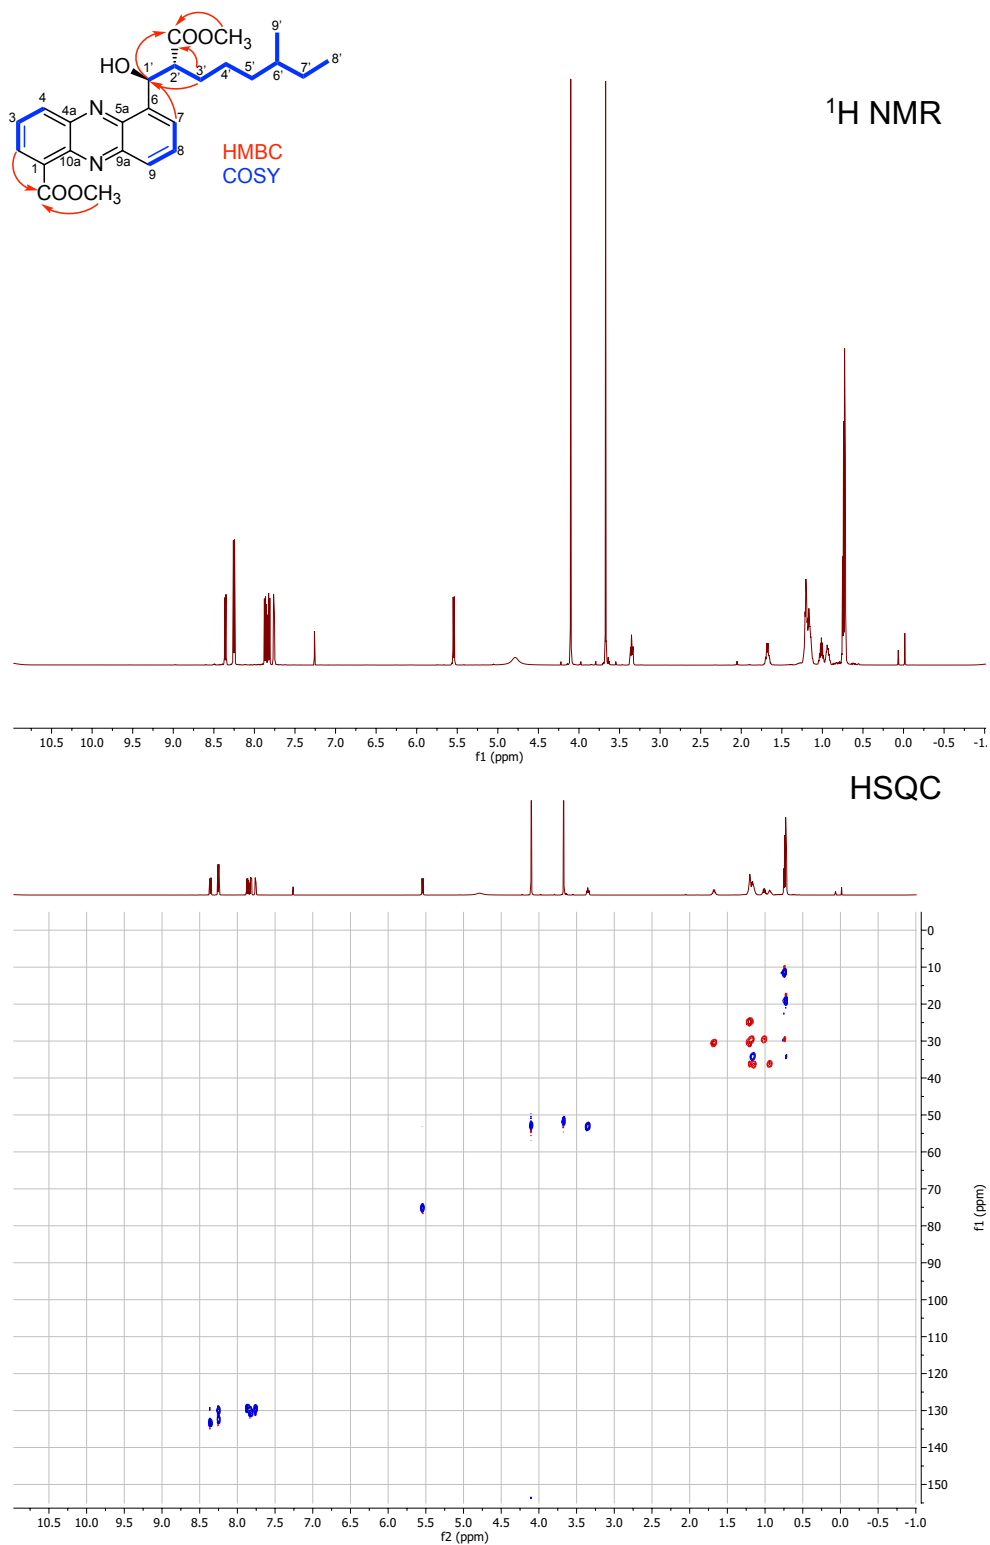

# HMBC

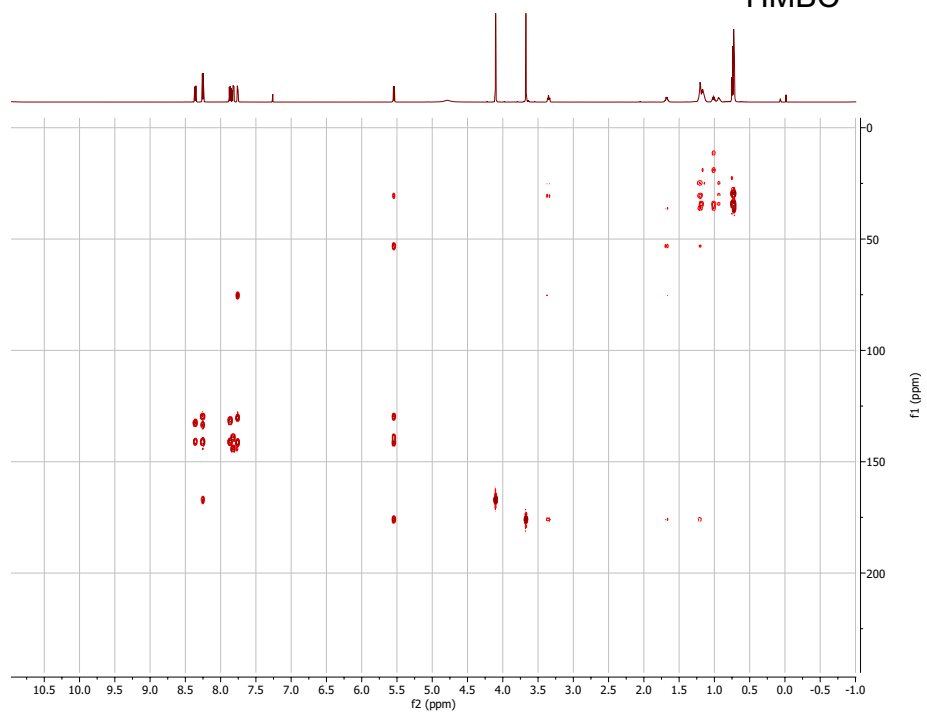

# COSY

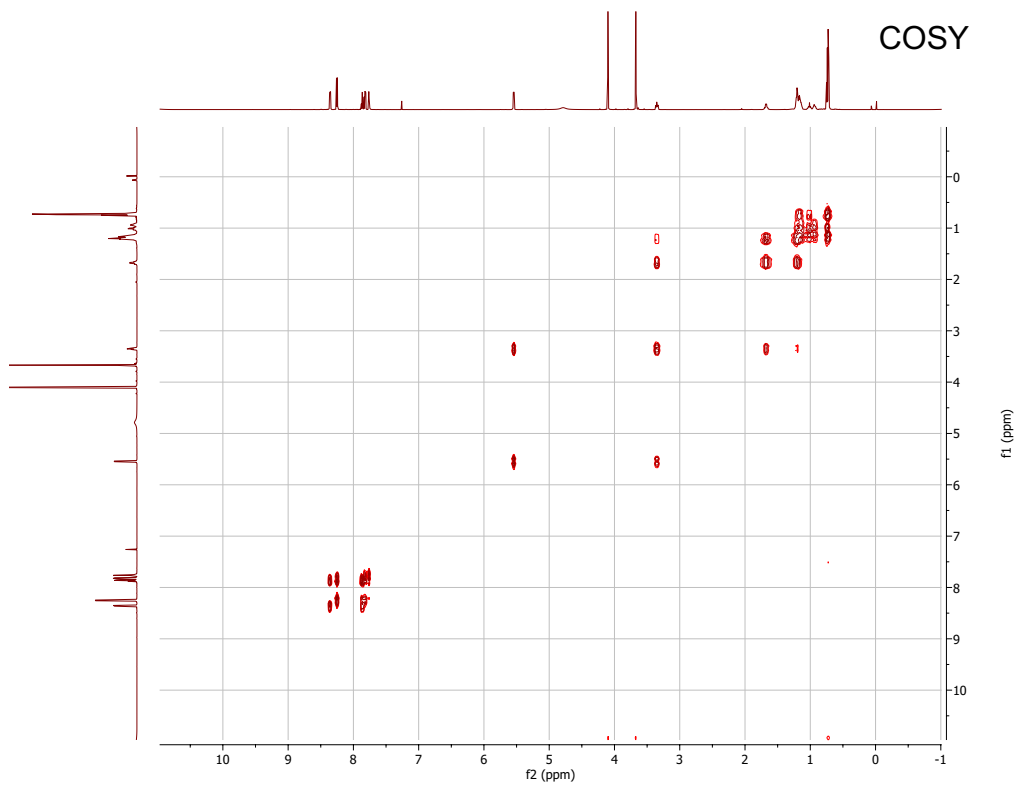

NMR spectroscopic data of compound **19** (streptophenazine F).

| Position                    | $\delta_c$ | $\delta_H$ mult. (J)                     | HMBC                                       | COSY      |
|-----------------------------|------------|------------------------------------------|--------------------------------------------|-----------|
| <b>1</b>                    | 131.9      |                                          |                                            |           |
| <b>2</b>                    | 132.6      | 8.26, dd (1.41, 3.51)                    | 4, 10a, <b>1-COOCH<sub>3</sub></b>         | 3         |
| <b>3</b>                    | 129.4      | 7.86, dd (6.90, 8.73)                    | 1, 4a                                      | 2, 4      |
| <b>4</b>                    | 133.4      | 8.36, dd (1.44, 8.71)                    | 2, 10a                                     | 3         |
| <b>4a</b>                   | 140.9      |                                          |                                            |           |
| <b>5a</b>                   | 141.1      |                                          |                                            |           |
| <b>6</b>                    | 139.1      |                                          |                                            |           |
| <b>7</b>                    | 129.6      | 7.77, dt (1.04, 1.04, 6.75)              | 1', 5a, 9                                  | 8         |
| <b>8</b>                    | 130.5      | 7.83, dd (6.7, 8.73)                     | 6, 9a                                      | 7, 9      |
| <b>9</b>                    | 130.1      | 8.25, t (1.55, 1.55)                     | 7, 5a                                      | 8         |
| <b>9a</b>                   | 144.2      |                                          |                                            |           |
| <b>10a</b>                  | 140.8      |                                          |                                            |           |
| <b>1'</b>                   | 75.1       | 5.56, d (7.69)                           | 2', 2', 5a, 7, <b>2'-COOCH<sub>3</sub></b> | 2'        |
| <b>2'</b>                   | 53.1       | 3.35, ddd (4.61, 7.64, 10.16)            | 1', 3', 4', 6, <b>2'-COOCH<sub>3</sub></b> | 1', 3'    |
| <b>3'</b>                   | 30.3       | 1.68 and 1.27                            | 1', 2', 5', <b>2'-COOCH<sub>3</sub></b>    | 2', 4'    |
| <b>4'</b>                   | 27.7       | 1.15 dtt (3.22, 3.22, 5.32, 5.32, 12.64) | 2', 3', 5', 6' 7'                          | 3', 5'    |
| <b>5'</b>                   | 27.2       | 1.18                                     | 3', 7'                                     | 6'        |
| <b>6'</b>                   | 38.5       | 1.01                                     | 8'/9', 4'                                  | 5', 7'    |
| <b>7'</b>                   | 27.8       | 1.4 dt (6.07, 6.67, 13.28)               | 8'/9', 5', 6'                              | 6', 8'/9' |
| <b>8'</b>                   | 22.5       | 0.76, dd (4.07, 6.70)                    | 8'/9', 7', 6'                              | 7'        |
| <b>9'</b>                   | 22.5       | 0.76, dd (4.07, 6.70)                    | 8'/9', 7', 6'                              | 7'        |
| <b>1-COOCH<sub>3</sub></b>  | 167        |                                          |                                            |           |
| <b>1-COOCH<sub>3</sub></b>  | 52.7       | 4.11, s                                  | <b>1-COOCH<sub>3</sub></b>                 |           |
| <b>2'-COOCH<sub>3</sub></b> | 175.9      |                                          |                                            |           |
| <b>2'-COOCH<sub>3</sub></b> | 51.5       | 3.66, s                                  | <b>2'-COOCH<sub>3</sub></b>                |           |

$^1\text{H}$ , HSQC, HMBC, and COSY NMR spectra and key HMBC and COSY correlations of compound **19** (streptophenazine F).

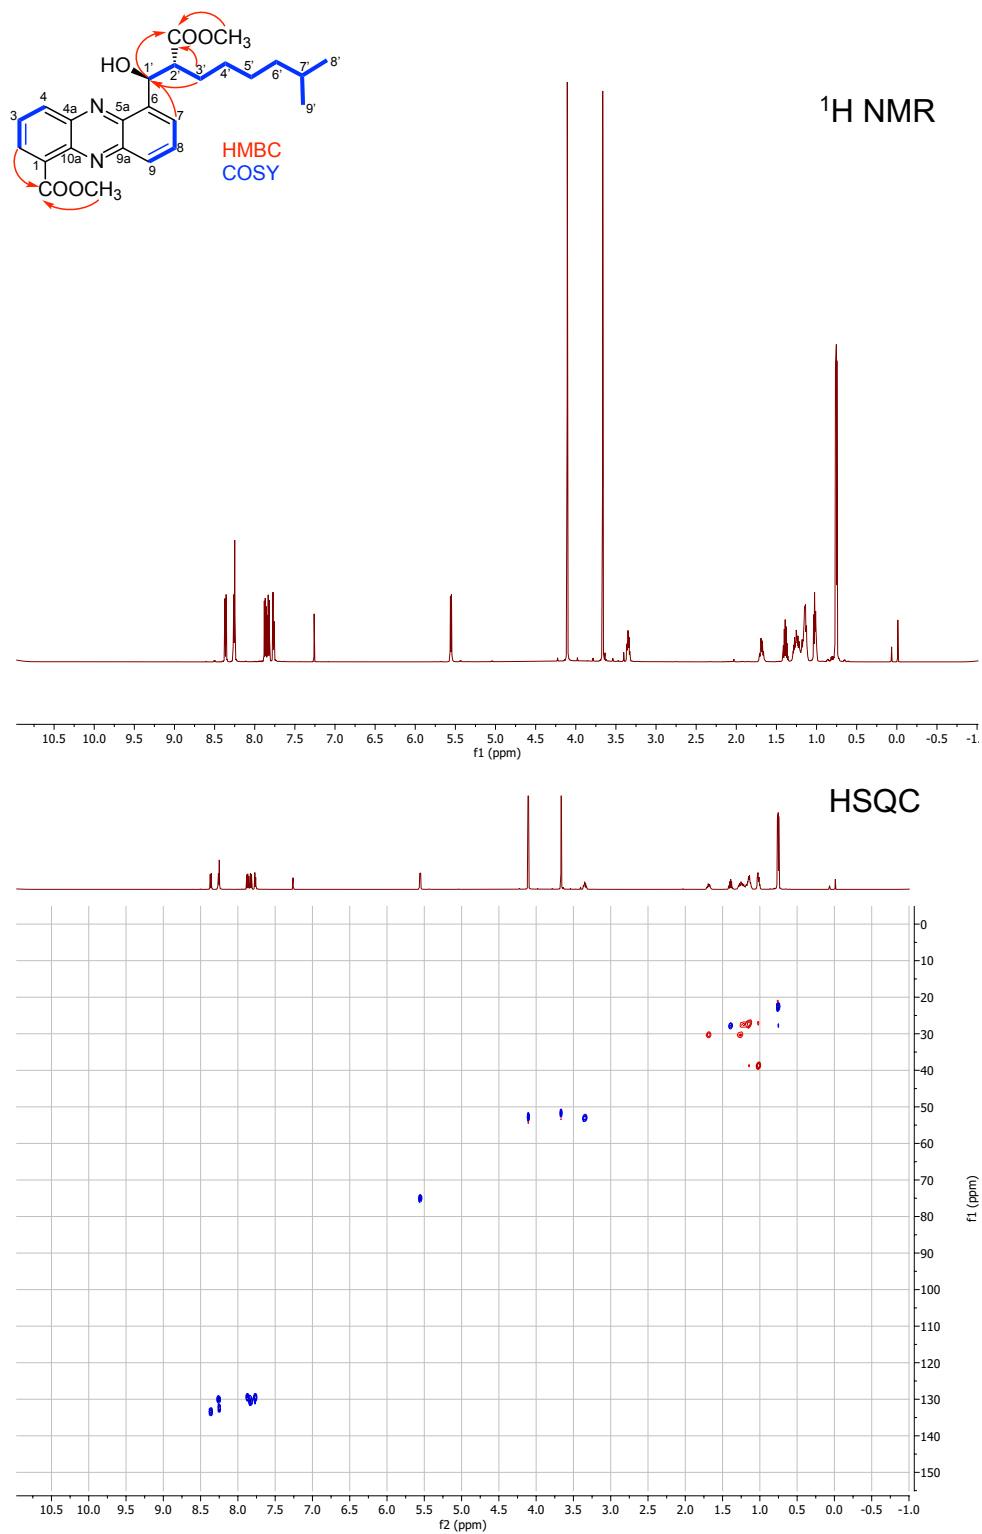



# HMBC

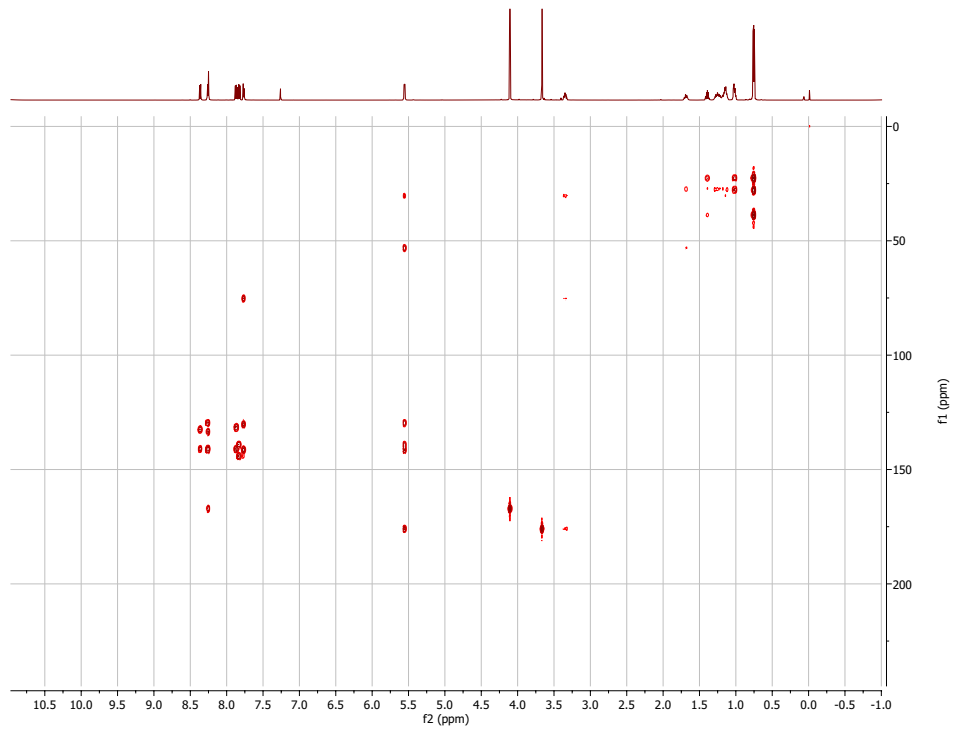

# COSY

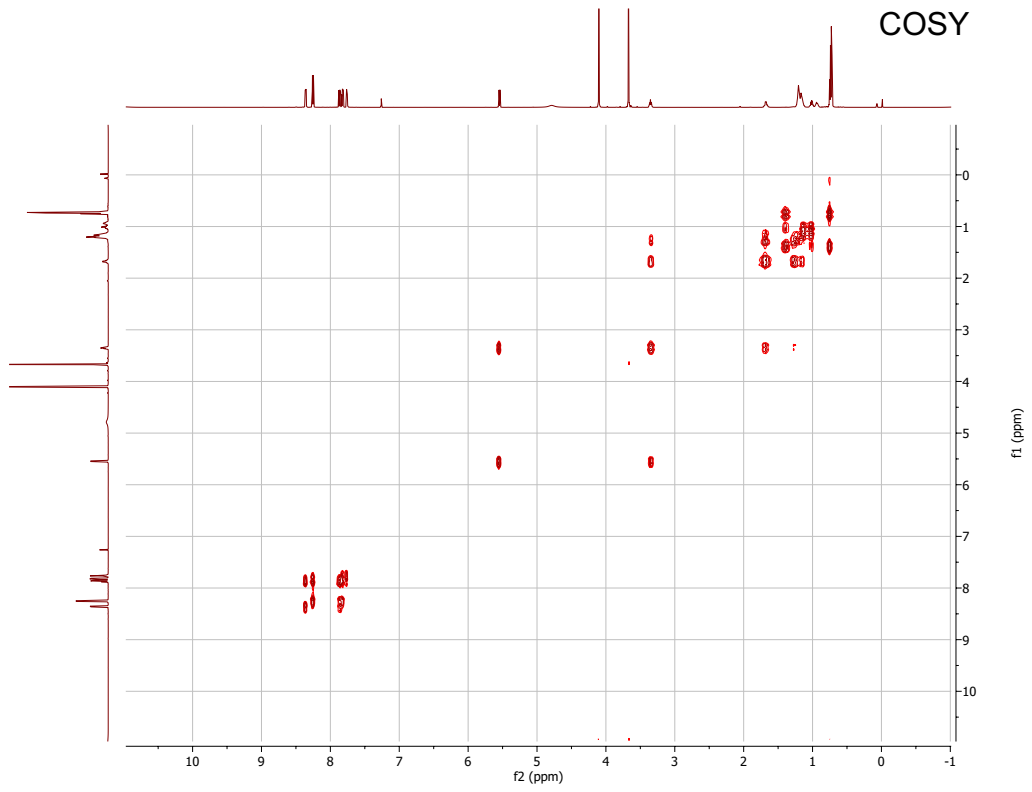

NMR spectroscopic data of compound **20** (streptophenazine Q).

| Position                    | $\delta_c$ | $\delta_H$ mult. (J)         | HMBC                                          | COSY       |
|-----------------------------|------------|------------------------------|-----------------------------------------------|------------|
| <b>1</b>                    | 136.3      |                              |                                               |            |
| <b>2</b>                    | 133        | 8.27 dd (1.42, 6.90)         | 4, 10a, <b>1-COOCH<sub>3</sub></b>            | 3          |
| <b>3</b>                    | 129.3      | 7.9 m                        | 1, 4a                                         | 2, 4       |
| <b>4</b>                    | 133.7      | 8.46 dd (1.46 8.720)         | 2, 10a                                        | 3          |
| <b>4a</b>                   | 142.3      |                              |                                               |            |
| <b>5a</b>                   | 141.3      |                              |                                               |            |
| <b>6</b>                    | 136.8      |                              |                                               |            |
| <b>7</b>                    | 129.5      | 7.9 m                        | 1', 5a, 9                                     | 8          |
| <b>8</b>                    | 129.5      | 7.9 m                        | 6, 9a                                         | 7, 9       |
| <b>9</b>                    | 131        | 8.31 dd (1.53, 8.54)         | 7, 5a                                         | 8          |
| <b>9a</b>                   | 142.1      |                              |                                               |            |
| <b>10a</b>                  | 141.5      |                              |                                               |            |
| <b>11</b>                   | 168        |                              |                                               |            |
| <b>12</b>                   | 40.3       | 4.19 d (4.98); 4.16 d (5.08) | 14                                            | 13         |
| <b>13</b>                   | -          | 6.05 s                       | -                                             | 12, 14     |
| <b>14</b>                   | 161        | 8.21 s                       | 12                                            | 13         |
| <b>1'</b>                   | 73.1       | 7.39 d (8.1)                 | 2', 5a, 6, 7, 11, <b>2'-COOCH<sub>3</sub></b> | 2'         |
| <b>2'</b>                   | 51.1       | 3.39 m                       | 1', 3', <b>2'-COOCH<sub>3</sub></b>           | 1', 3'     |
| <b>3'</b>                   | 28.9       | 1.67, 1.25                   | 1', 5' <b>2'-COOCH<sub>3</sub></b>            | 2', 4'     |
| <b>4'</b>                   | 24.9       | 1.18                         | 2', 5', 6'                                    | 3', 5'     |
| <b>5'</b>                   | 38.7       | 1.01                         | 3', 7'/ 8'                                    | 4', 6'     |
| <b>6'</b>                   | 27.7       | 1.39                         | 5', 4', 7'/ 8'                                | 7', 8', 5' |
| <b>7'</b>                   | 22.6       | 0.75 d (6.60)                | 5', 6', 8'                                    | 8', 6'     |
| <b>8'</b>                   | 22.6       | 0.75 d (6.60)                | 5', 6', 7'                                    | 6', 7'     |
| <b>1-COOCH<sub>3</sub></b>  | 167.3      |                              |                                               |            |
| <b>1-COOCH<sub>3</sub></b>  | 52.4       | 4.11 s                       | <b>1-COOCH<sub>3</sub></b>                    |            |
| <b>2'-COOCH<sub>3</sub></b> | 173.4      |                              |                                               |            |
| <b>2'-COOCH<sub>3</sub></b> | 51.4       | 3.64 s                       | <b>2'-COOCH<sub>3</sub></b>                   |            |

$^1\text{H}$ , HSQC, HMBC, and COSY NMR spectra and key HMBC and COSY correlations of compound **20** (streptophenazine Q).

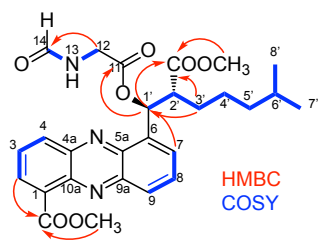

$^1\text{H}$  NMR

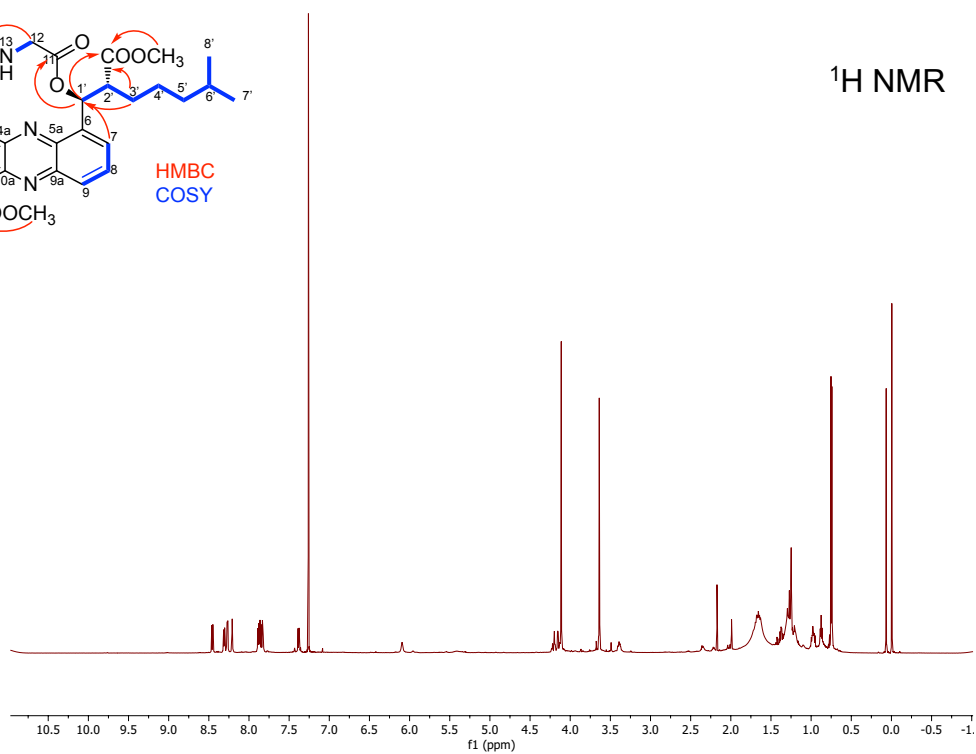

HSQC

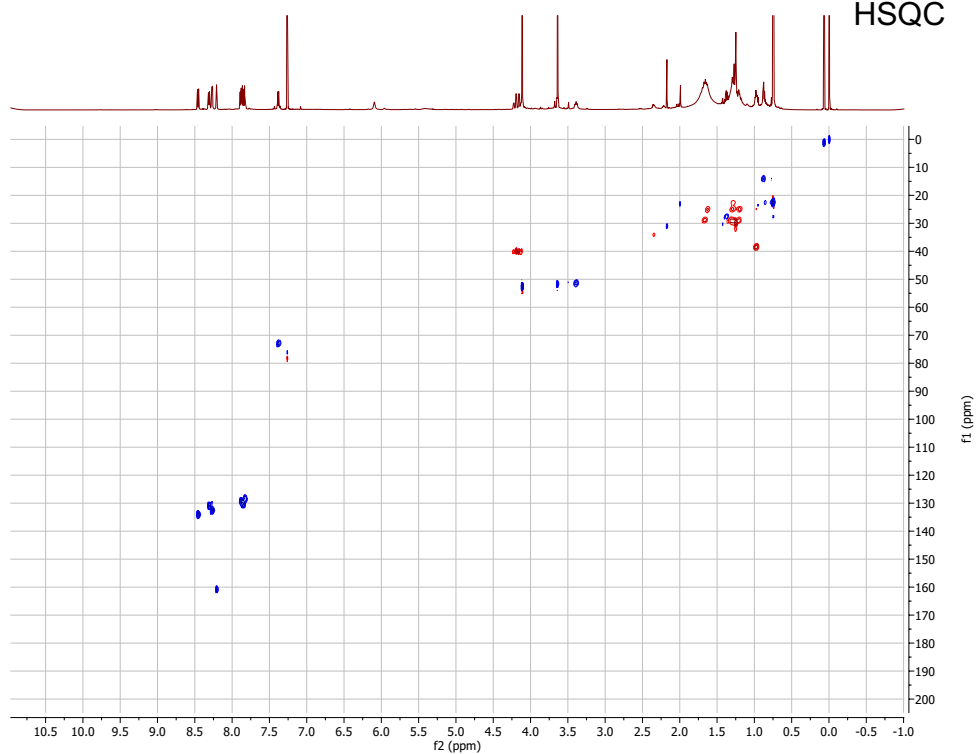

# HMBC

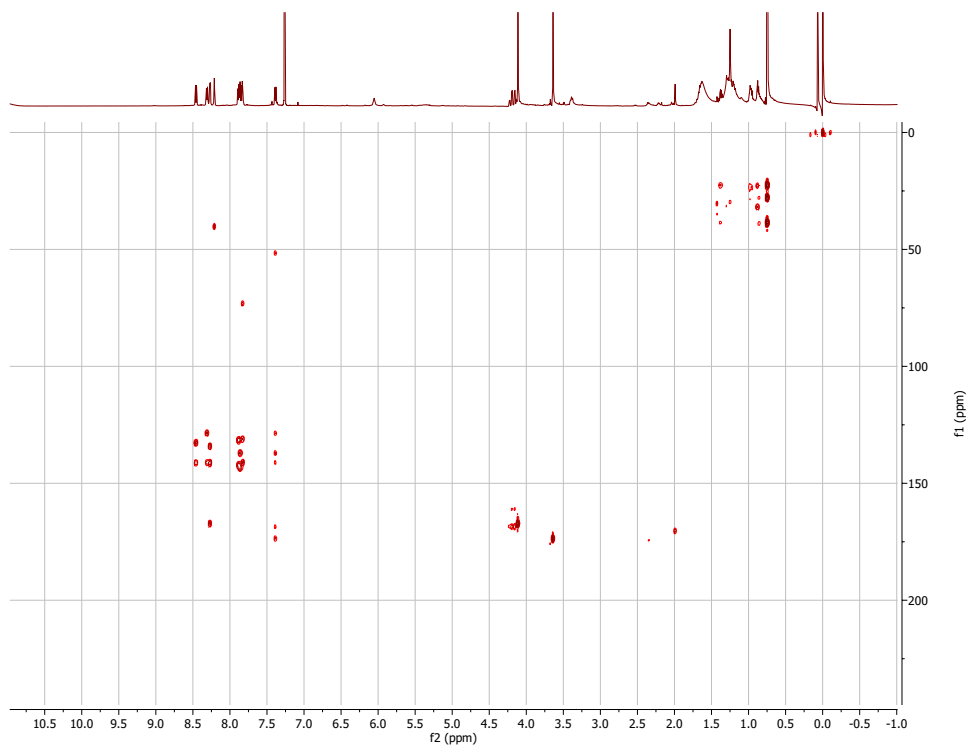

# COSY

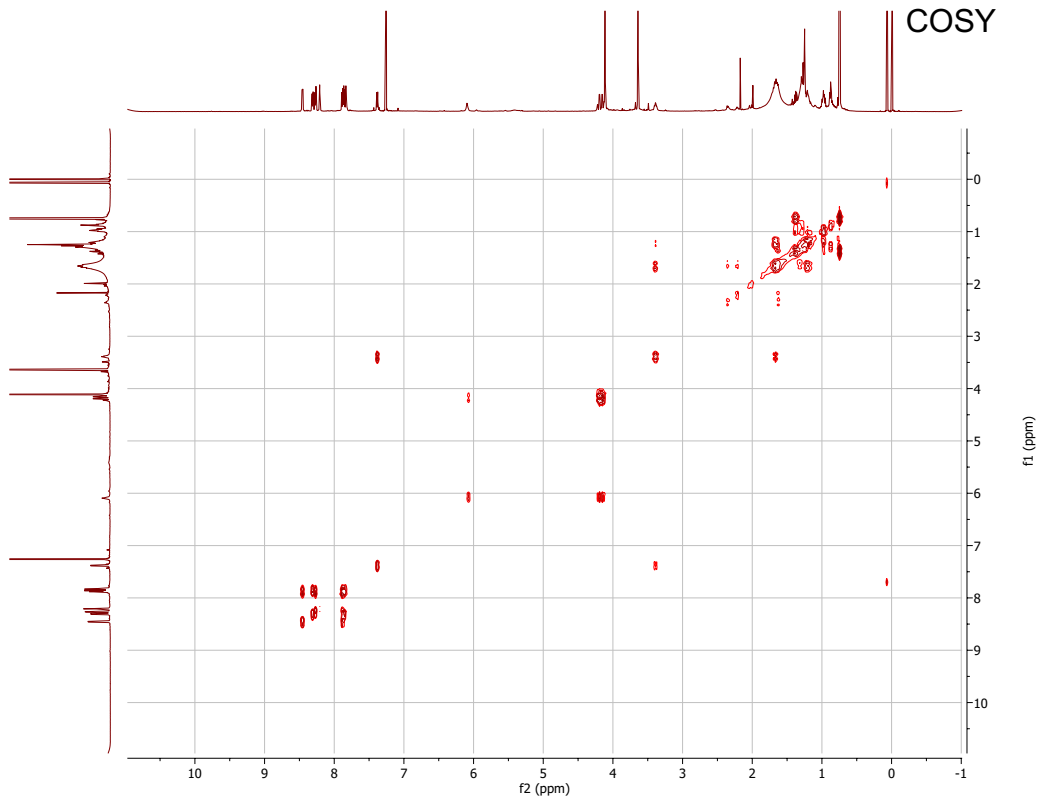

NMR spectroscopic data of compound **21** (streptophenazine R).

| Position                    | $\delta_c$ | $\delta_H$ mult. (J)         | HMBC                                              | COSY   |
|-----------------------------|------------|------------------------------|---------------------------------------------------|--------|
| <b>1</b>                    | 136.6      |                              |                                                   |        |
| <b>2</b>                    | 132.2      | 8.27 dd (1.46, 6.90)         | 4, 10a, <b>1-COOCH<sub>3</sub></b>                | 3      |
| <b>3</b>                    | 129.5      | 7.9, m                       | 1, 4a                                             | 2, 4   |
| <b>4</b>                    | 134.2      | 8.46 dd (1.44, 8.69)         | 2, 10a                                            | 3      |
| <b>4a</b>                   | 142        |                              |                                                   |        |
| <b>5a</b>                   | 141.5      |                              |                                                   |        |
| <b>6</b>                    | 137        |                              |                                                   |        |
| <b>7</b>                    | 129.5      | 7.9, m                       | 1', 5a, 9                                         | 8      |
| <b>8</b>                    | 129.5      | 7.9, m                       | 6, 9a                                             | 7, 9   |
| <b>9</b>                    | 130.9      | 8.31 dd (1.54, 8.54)         | 7, 5a                                             | 8      |
| <b>9a</b>                   | 142        |                              |                                                   |        |
| <b>10a</b>                  | 141.3      |                              |                                                   |        |
| <b>11</b>                   | 168        |                              |                                                   |        |
| <b>12</b>                   | 40.2       | 4.19 d (5.07); 4.16 d (5.13) | 14                                                | 13     |
| <b>13</b>                   |            | 6.06 s                       |                                                   | 12, 14 |
| <b>14</b>                   | 161        | 8.21 s                       | 12                                                | 13     |
| <b>1'</b>                   | 72.8       | 7.38 d (7.92)                | 2', 3', 5a, 6, 7, 11, <b>2'-COOCH<sub>3</sub></b> | 2'     |
| <b>2'</b>                   | 51.3       | 3.39 td (4.25, 9.11, 8.75)   | 1', 3', <b>2'-COOCH<sub>3</sub></b>               | 1', 3' |
| <b>3'</b>                   | 28.8       | 1.65, 1.27                   | 1', 5', <b>2'-COOCH<sub>3</sub></b>               | 2', 4' |
| <b>4'</b>                   | 29.8       | 1.22                         | 2', 5', 6'                                        | 3', 5' |
| <b>5'</b>                   | 29.2       | 1.29                         | 3', 6', 7'                                        | 4', 6' |
| <b>6'</b>                   | 31.65      | 1.10                         | 4', 8'                                            | 5', 7' |
| <b>7'</b>                   | 22.5       | 1.16                         | 5', 6', 8'                                        | 6', 8' |
| <b>8'</b>                   | 14.1       | 0.77, t (7.2)                | 6', 7'                                            | 7'     |
| <b>1-COOCH<sub>3</sub></b>  | 167.1      |                              |                                                   |        |
| <b>1-COOCH<sub>3</sub></b>  | 52.5       | 4.11 s                       | <b>1-COOCH<sub>3</sub></b>                        |        |
| <b>2'-COOCH<sub>3</sub></b> | 173.3      |                              |                                                   |        |
| <b>2'-COOCH<sub>3</sub></b> | 51.6       | 3.64 s                       | <b>2'-COOCH<sub>3</sub></b>                       |        |

$^1\text{H}$ , HSQC, HMBC, and COSY NMR spectra and key HMBC and COSY correlations of compound **21** (streptophenazine R).

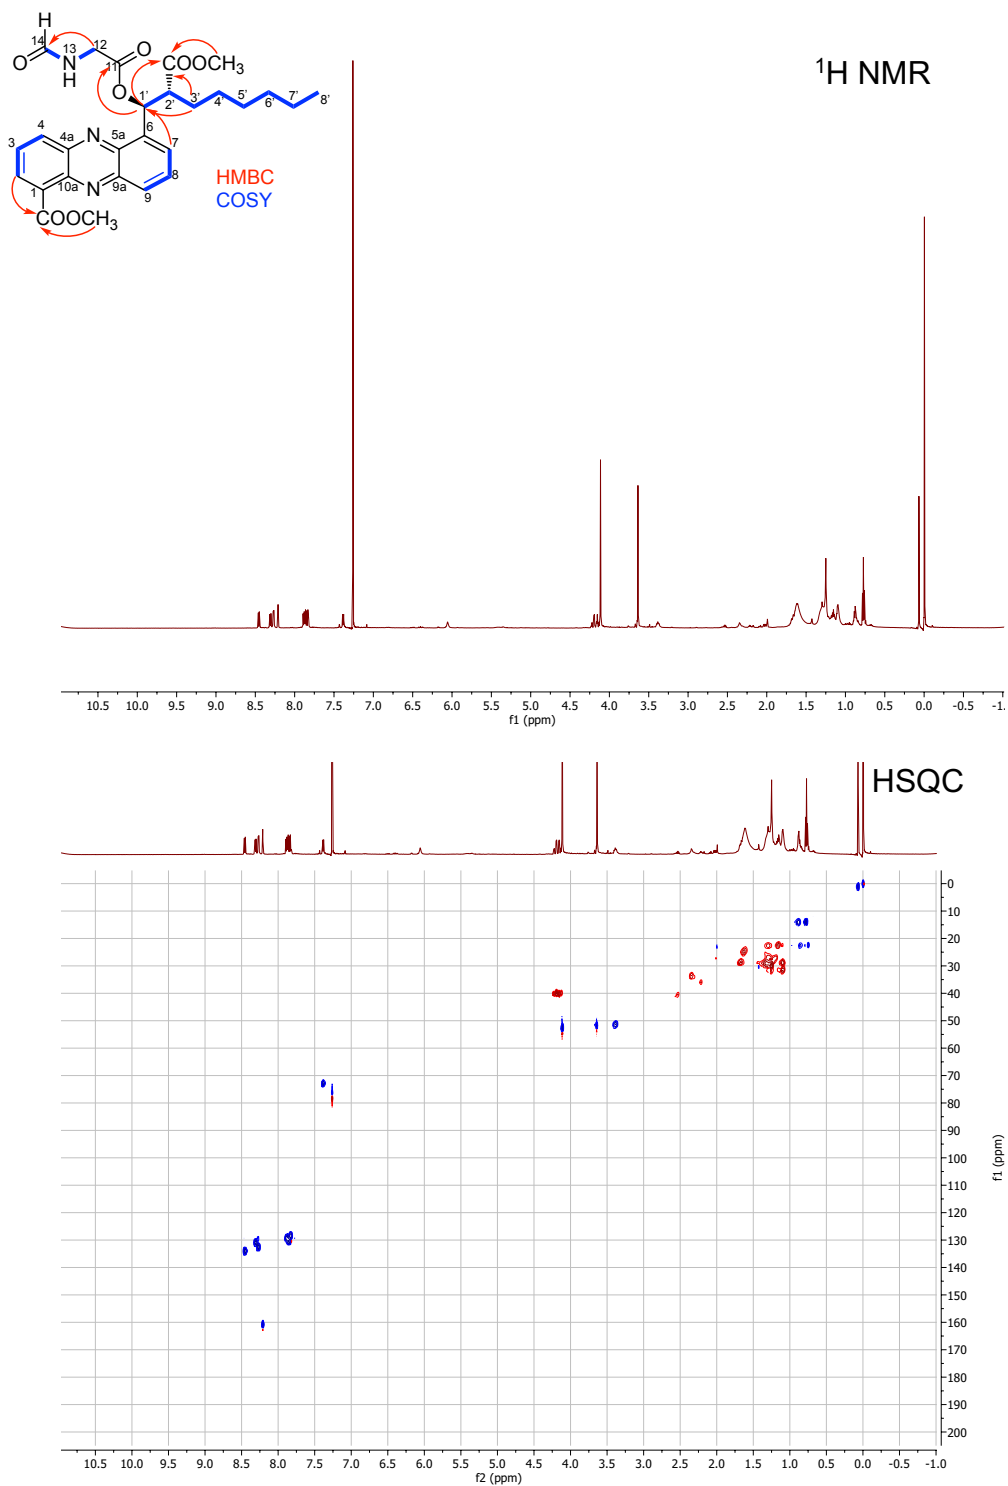

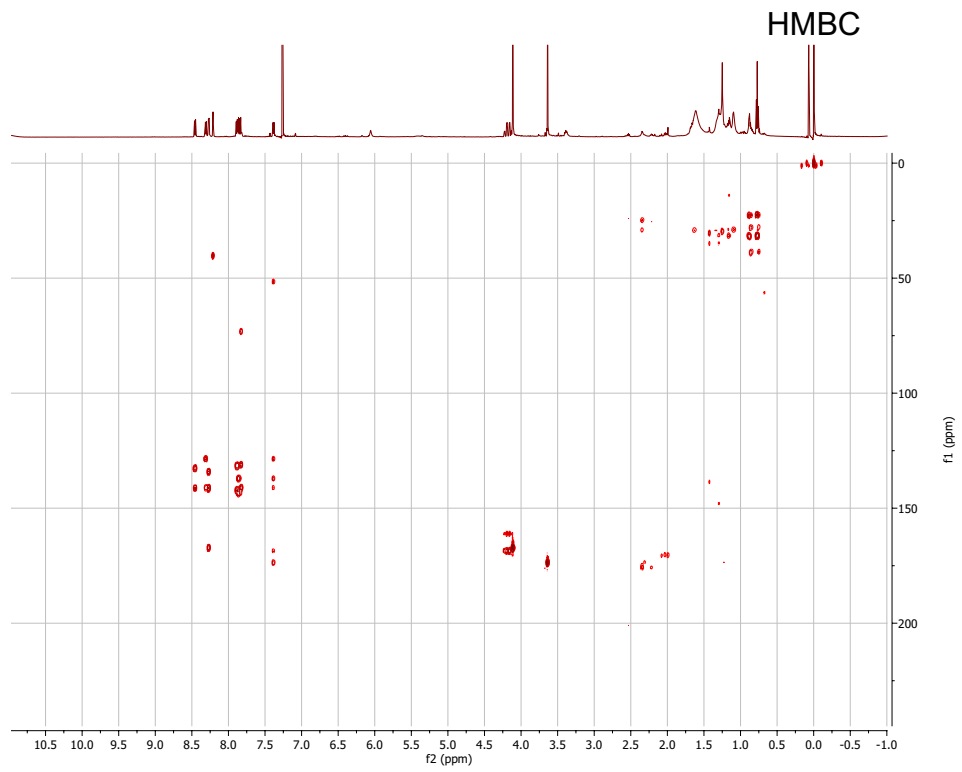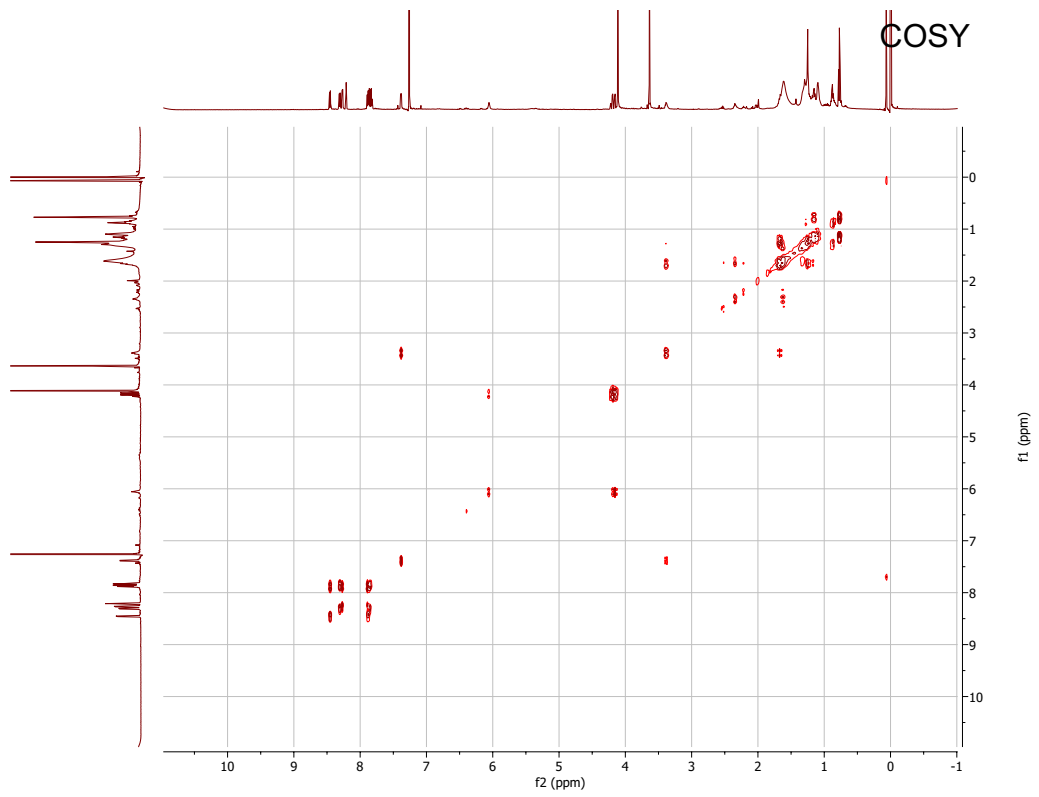

NMR spectroscopic data of compound **22** (diastereomer of streptophenazine G).

| Position                    | $\delta_C$ | $\delta_H$ mult. (J)          | HMBC                                          | COSY       |
|-----------------------------|------------|-------------------------------|-----------------------------------------------|------------|
| <b>1</b>                    | 131.6      |                               |                                               |            |
| <b>2</b>                    | 132.5      | 8.26, ddd (1.44, 7.84, 10.14) | 4, 10a, <b>1-COOCH<sub>3</sub></b>            | 3          |
| <b>3</b>                    | 129.5      | 7.88, dd (6.91, 8.73)         | 1, 4a                                         | 2, 4       |
| <b>4</b>                    | 133.4      | 8.36, dd (1.44, 8.70)         | 2, 10a                                        | 3          |
| <b>4a</b>                   | 140.6      |                               |                                               |            |
| <b>5a</b>                   | 141.3      |                               |                                               |            |
| <b>6</b>                    | 138.2      |                               |                                               |            |
| <b>7</b>                    | 129.7      | 7.74 dt (1.09, 1.09, 6.75)    | 1', 5a, 9                                     | 8          |
| <b>8</b>                    | 130.4      | 7.8, dd (6.79, 8.73)          | 6, 9a                                         | 7, 9       |
| <b>9</b>                    | 130.1      | 8.25, ddd (1.44, 7.84, 10.14) | 7, 5a                                         | 8          |
| <b>9a</b>                   | 144.4      |                               |                                               |            |
| <b>10a</b>                  | 140.8      |                               |                                               |            |
| <b>1'</b>                   | 76         | 5.43, d (7.71)                | 2', 3', 5a, 6, 7, <b>2'-COOCH<sub>3</sub></b> | 2'         |
| <b>2'</b>                   | 53.4       | 3.31, ddd (3.78, 7.72, 10.64) | 1', 3', 6, <b>2'-COOCH<sub>3</sub></b>        | 1', 3'     |
| <b>3'</b>                   | 28.9       | 1.93, 1.85                    | 1', 2', 4', 5', <b>2'-COOCH<sub>3</sub></b>   | 2', 4'     |
| <b>4'</b>                   | 25.22      | 1.23                          | 2', 3', 5', 6'                                | 3', 5'     |
| <b>5'</b>                   | 36.21      | 1.06, 1.26                    | 3', 4', 6', 9'                                | 4', 6'     |
| <b>6'</b>                   | 34.13      | 1.24                          | 4', 5', 7', 8', 9'                            | 5', 7', 9' |
| <b>7'</b>                   | 29.61      | 1.07, 1.22                    | 5', 8', 9'                                    | 6', 8'     |
| <b>8'</b>                   | 11.69      | 0.8                           | 5', 6', 7'                                    | 6', 7'     |
| <b>9'</b>                   | 18.97      | 0.78                          | 5', 6', 7'                                    | 6', 7'     |
| <b>1-COOCH<sub>3</sub></b>  | 167.2      |                               |                                               |            |
| <b>1-COOCH<sub>3</sub></b>  | 52.8       | 4.11, s                       | <b>1-COOCH<sub>3</sub></b>                    |            |
| <b>2'-COOCH<sub>3</sub></b> | 175.3      |                               |                                               |            |
| <b>2'-COOCH<sub>3</sub></b> | 51.5       | 3.4, s                        | <b>12'-COOCH<sub>3</sub></b>                  |            |



$^1\text{H}$ , HSQC, HMBC, and COSY NMR spectra and key HMBC and COSY correlations of compound **22** (diastereomer of streptopenazine G).

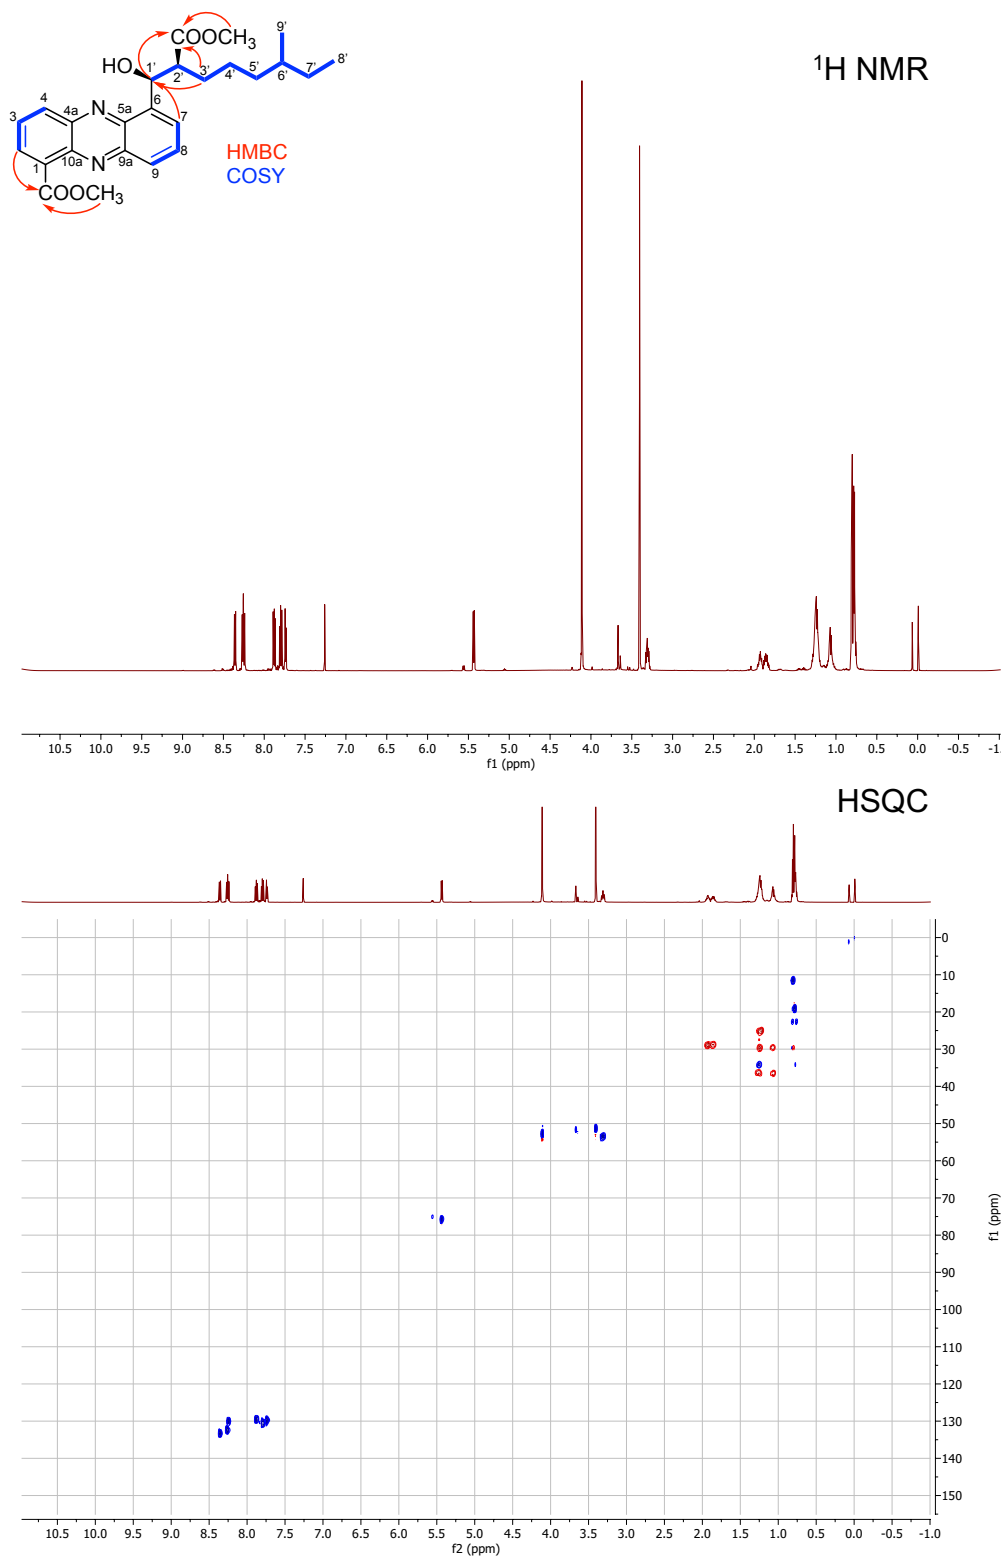

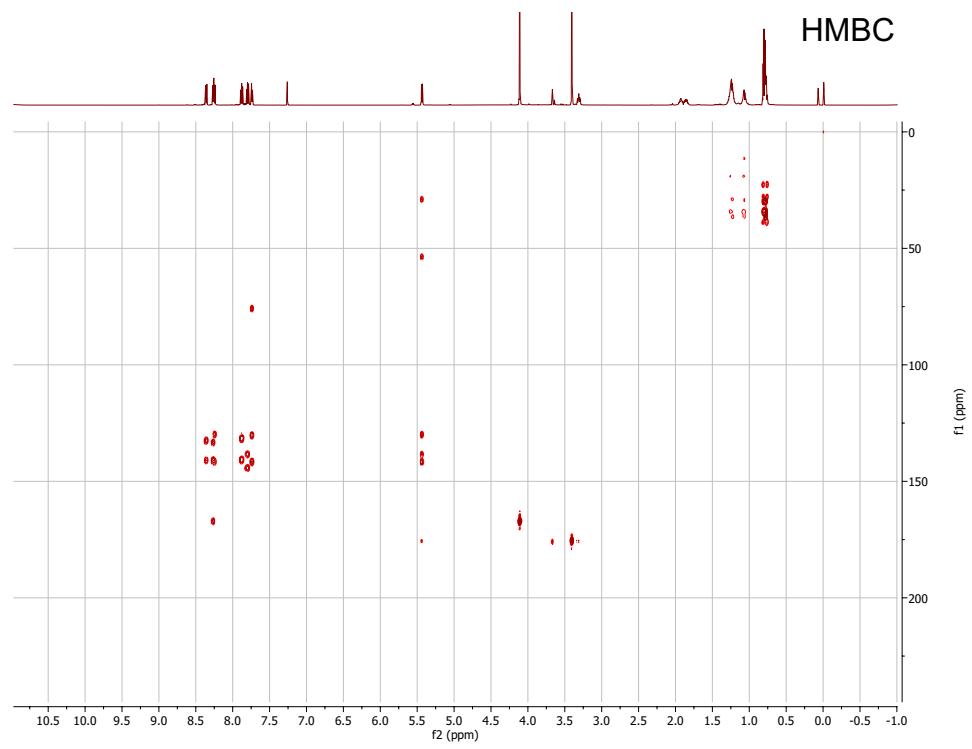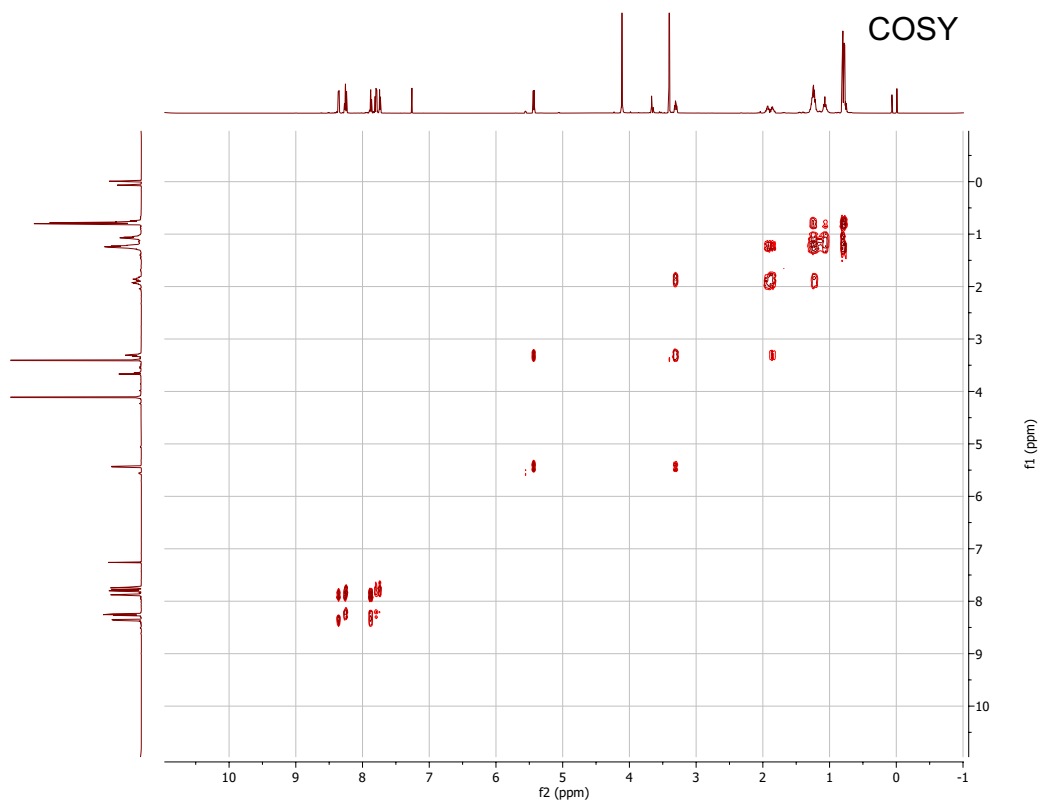

NMR spectroscopic data of compound **23** (diastereomer of streptophenazine F).

| Position                    | $\delta_c$ | $\delta_H$ mult. (J)          | HMBC                                          | COSY      |
|-----------------------------|------------|-------------------------------|-----------------------------------------------|-----------|
| <b>1</b>                    | 131.8      |                               |                                               |           |
| <b>2</b>                    | 132.35     | 8.26, m                       | 4, 10a, <b>1-COOCH<sub>3</sub></b>            | 3         |
| <b>3</b>                    | 129.49     | 7.88, dd (6.91, 8.75)         | 1, 4a                                         | 2, 4      |
| <b>4</b>                    | 133.15     | 8.36, dd (1.44, 8.69)         | 2, 10a                                        | 3         |
| <b>4a</b>                   | 140.59     |                               |                                               |           |
| <b>5a</b>                   | 141.5      |                               |                                               |           |
| <b>6</b>                    | 138.7      |                               |                                               |           |
| <b>7</b>                    | 129.63     | 7.74, dt (1.09, 1.09, 6.91)   | 1', 5a, 9                                     | 8         |
| <b>8</b>                    | 130.53     | 7.8, dd (6.80, 8.74)          | 6, 9a                                         | 7, 9      |
| <b>9</b>                    | 130.01     | 8.25, m                       | 7, 5a                                         | 8         |
| <b>9a</b>                   | 144.26     |                               |                                               |           |
| <b>10a</b>                  | 140.96     |                               |                                               |           |
| <b>1'</b>                   | 75.6       | 5.43, d (7.76)                | 2', 3', 5a, 6, 7, <b>2'-COOCH<sub>3</sub></b> | 2'        |
| <b>2'</b>                   | 53.41      | 3.30, ddd (3.69, 7.74, 11.34) | 1', 3', <b>2'-COOCH<sub>3</sub></b>           | 1', 3'    |
| <b>3'</b>                   | 28.5       | 1.85, 1.95                    | 2', 5'                                        | 2', 4'    |
| <b>4'</b>                   | 27.91      | 1.25                          | 2', 4', 6'                                    | 3', 5'    |
| <b>5'</b>                   | 27.65      | 1.19                          | 3', 4', 6', 7'                                | 4', 6'    |
| <b>6'</b>                   | 38.9       | 1.11                          | 4', 8'/9'                                     | 5', 7'    |
| <b>7'</b>                   | 28.02      | 1.45 dt (6.62, 6.62, 13.35)   | 5', 6', 8'/9'                                 | 6', 7'/8' |
| <b>8'</b>                   | 22.62      | 0.81 dd (2.99, 6.61)          | 6', 7', 9'                                    | 7'        |
| <b>9'</b>                   | 22.62      | 0.81 dd (2.99, 6.61)          | 6', 7', 8'                                    | 7'        |
| <b>1-COOCH<sub>3</sub></b>  | 167.4      |                               |                                               |           |
| <b>1-COOCH<sub>3</sub></b>  | 52.99      | 4.11, s                       | <b>1-COOCH<sub>3</sub></b>                    |           |
| <b>2'-COOCH<sub>3</sub></b> | 175.49     |                               |                                               |           |
| <b>2'-COOCH<sub>3</sub></b> | 51.38      | 3.4, s                        | <b>2'-COOCH<sub>3</sub></b>                   |           |

$^1\text{H}$ , HSQC, HMBC, and COSY NMR spectra and key HMBC and COSY correlations of compound **23** (diastereomer of streptophenazine F).

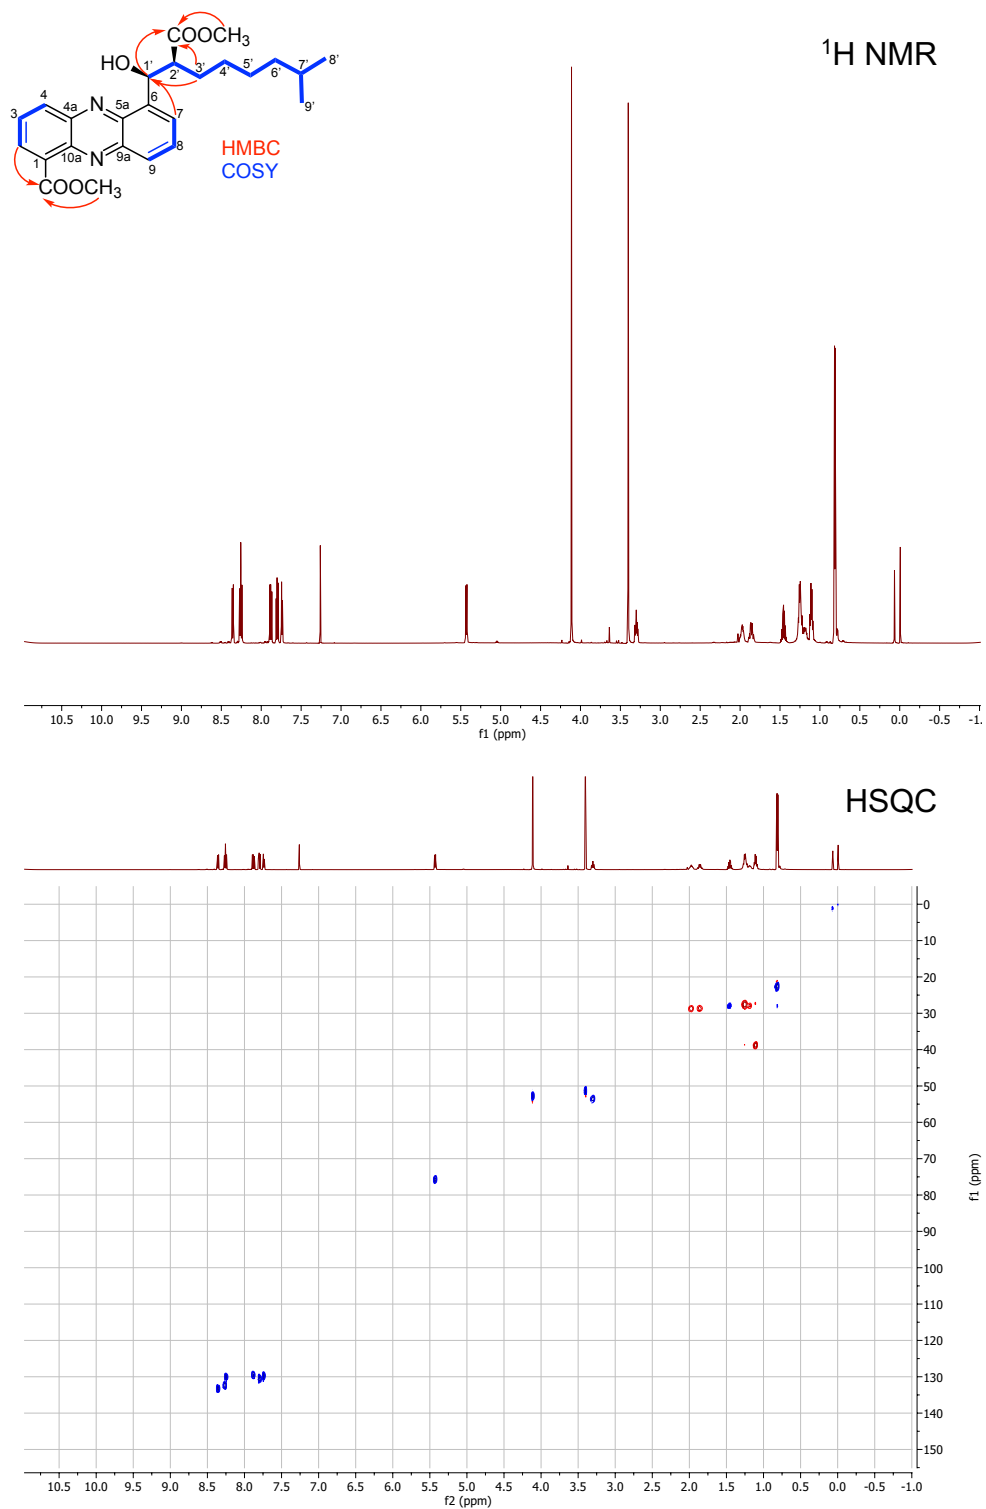

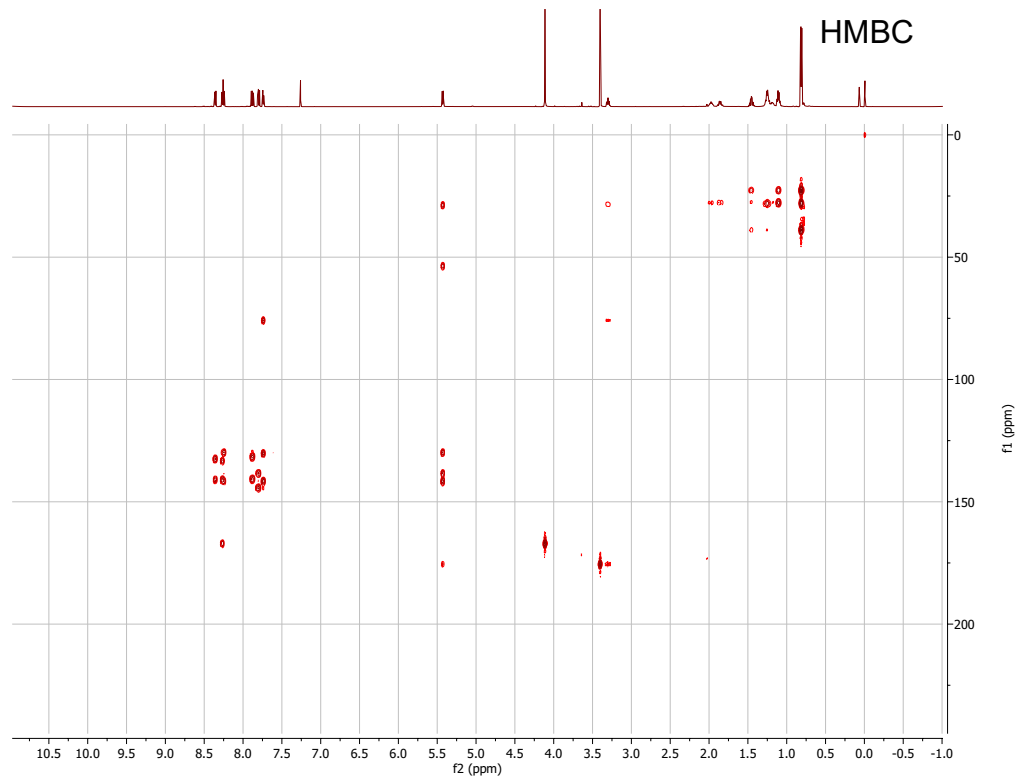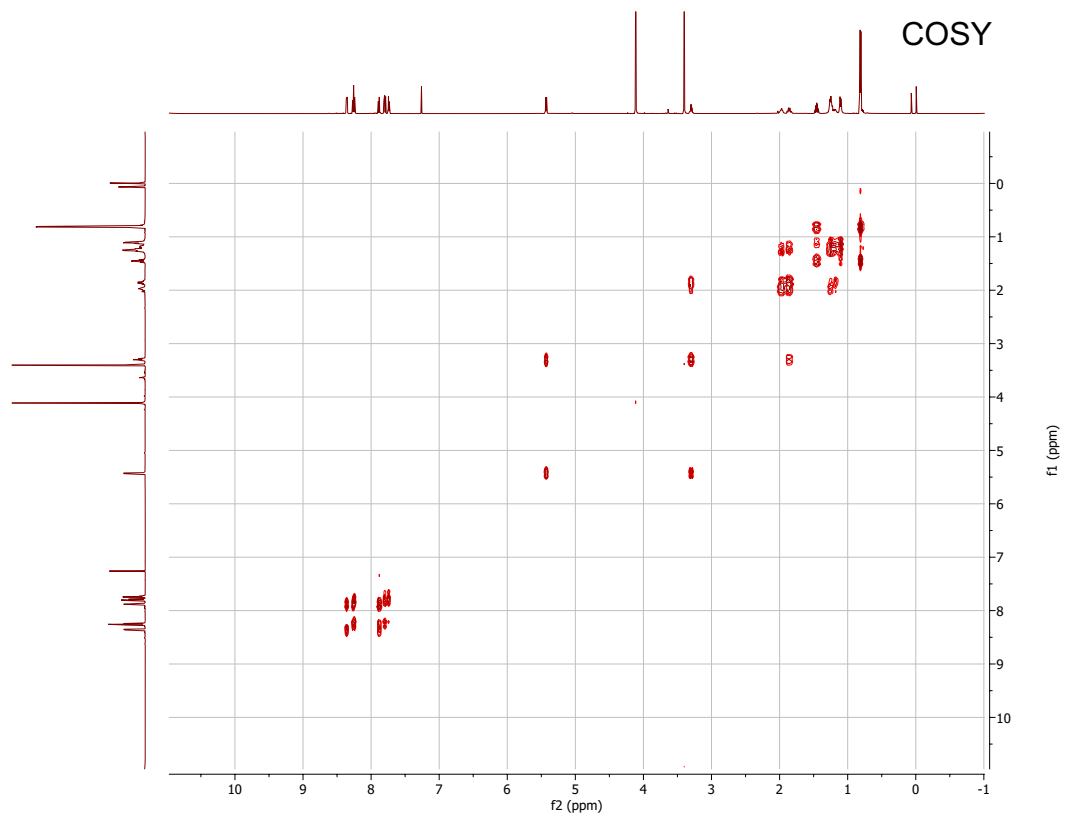

Supplement: NIHMS1521498-supplement-1.pdf [file NIHMS1521498-supplement-1.pdf]
