# Supplementary material
Source: PubMed Central journal article supplement (PMC6525064)
Supplement: NIHMS1521498-supplement-2.pdf [file NIHMS1521498-supplement-2.pdf]

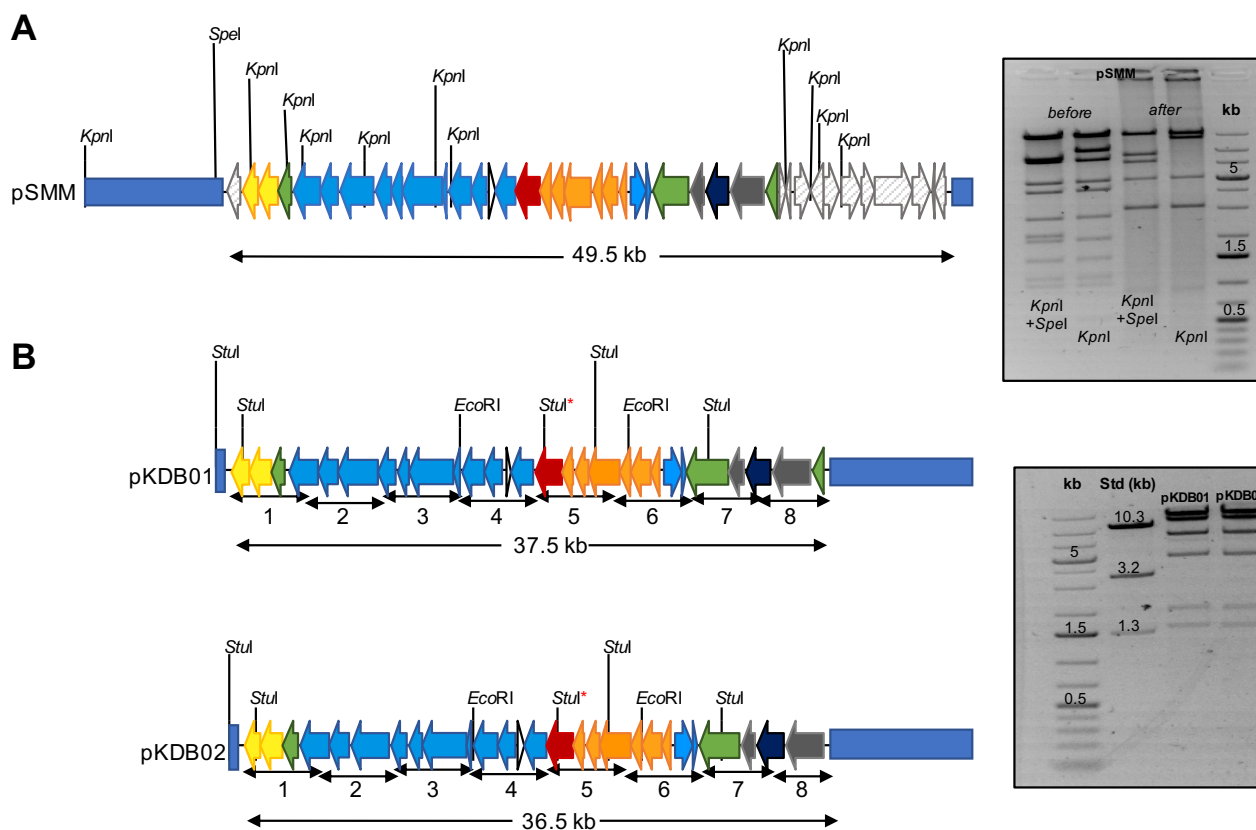

**Figure S1. Confirmation of the integrity of the captured *spz* BGC, related to Figures 1 and 2 and Table 1.** **A.** Restriction digest of pSMM before and after transformation in *E. coli* using KpnI and KpnI + SpeI enzymes. KpnI digest, expected sizes (kb) = 23.9, 11.1, 8.2, 4.9, 4.1, 2.7, 1.9, 1.5, 1.1, 1.0, 0.5. KpnI + SpeI digest, expected sizes (kb) = 22.9, 8.9, 8.2, 4.9, 4.1, 2.7, 2.1, 1.9, 1.5, 1.1, 1.0, 0.5. **B.** Restriction digest of pKDB01, expected sizes (kb): 18.0, 13.7, 8.3, 4.9, 2.0, 1.6, and pKDB02, expected sizes (kb): 17.0, 13.3, 8.3, 4.9, 2.0, 1.5, with EcoRI + Stul. \* indicates digest is blocked due to overlapping *dcm* methylation. Std – sequenced plasmid digested with EcoRI + Stul, used as a control, expected sizes (kb) = 10.3, 3.2, 1.3. Plasmid backbone represented by blue rectangle.

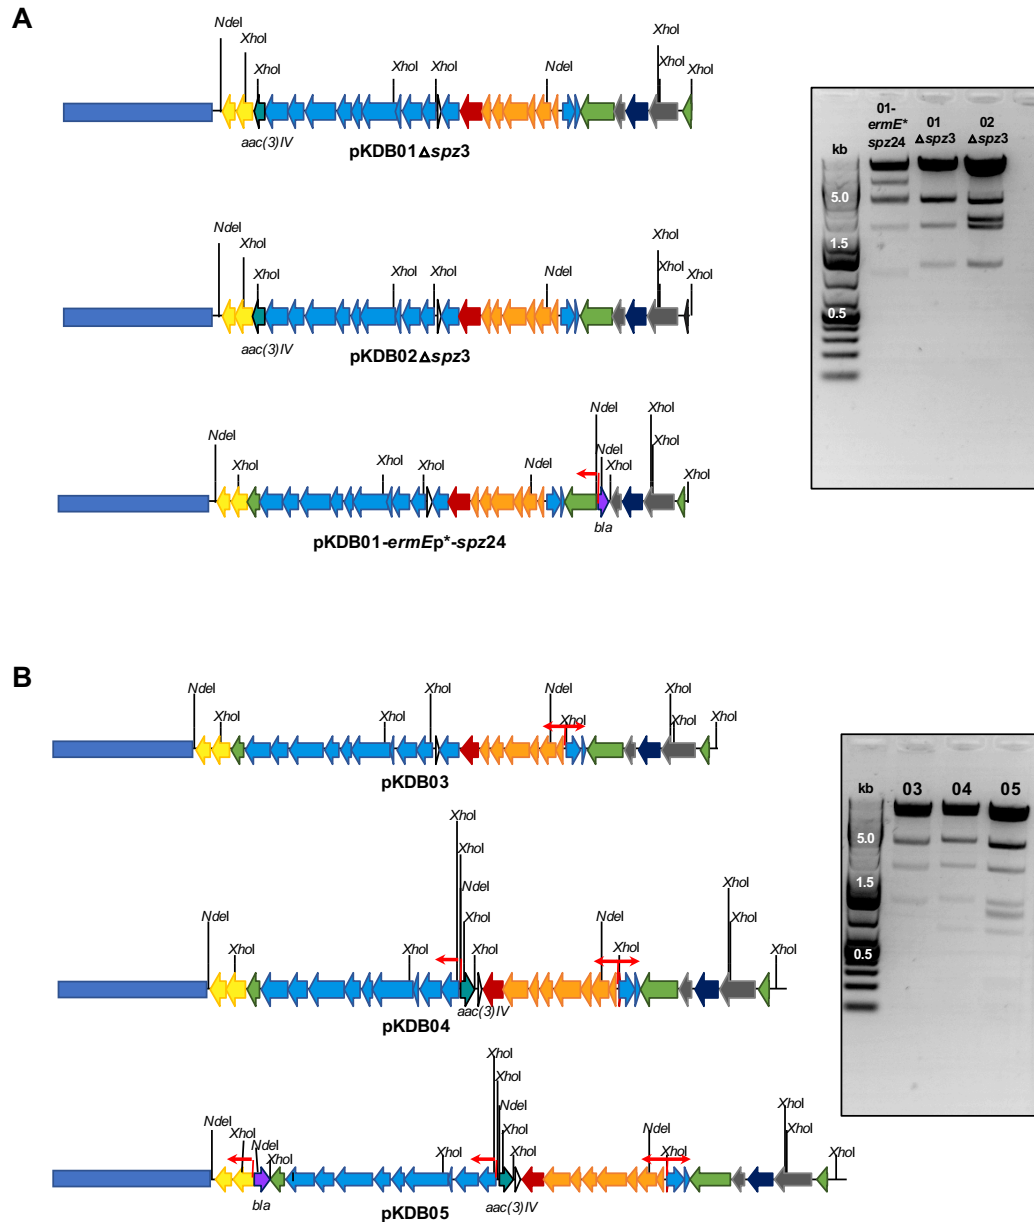

**Figure S2. Engineering the *spz* BGC, related to Figures 2 and 3. A.** Agarose gels of restriction digestions and corresponding maps of regulatory gene mutant plasmids. Enzyme pair *XhoI* + *NdeI* used for digestion. pKDB01 $\Delta$ *spz3*, expected sizes (kb): 10.6, 10.5, 8.7, 8.6, 3.2, 3.1, 1.9, 1.0, 0.1. pKDB02 $\Delta$ *spz3*, expected sizes (kb): 10.6, 10.5, 8.7, 8.6, 3.2, 2.1, 1.9, 1.0, 0.1. pKDB01-*ermE*\**p-spz24*, expected sizes (kb): 11.7, 10.5, 8.7, 5.2, 3.4, 3.2, 3.1, 1.9, 0.9, 0.2, 0.1. **B.** Restriction digest with *XhoI* + *NdeI* of refactored plasmids, agarose gel and corresponding plasmid map showing restriction sites: pKDB03, expected sizes (kb): 11.7, 10.5, 8.7, 7.6, 3.2, 3.1, 1.9, 1.1, 0.1; pKDB04, expected sizes (kb): 11.7, 10.5, 8.6, 7.5, 3.2, 3.1, 1.9, 1.1, 0.7, 0.3, 0.2, 0.1; pKDB05, expected sizes (kb): 10.9, 10.5, 8.7, 7.5, 3.2, 3.1, 1.9, 1.1, 0.9, 0.9, 0.7, 0.3, 0.3, 0.1. Plasmid backbone represented by blue rectangle.

**A**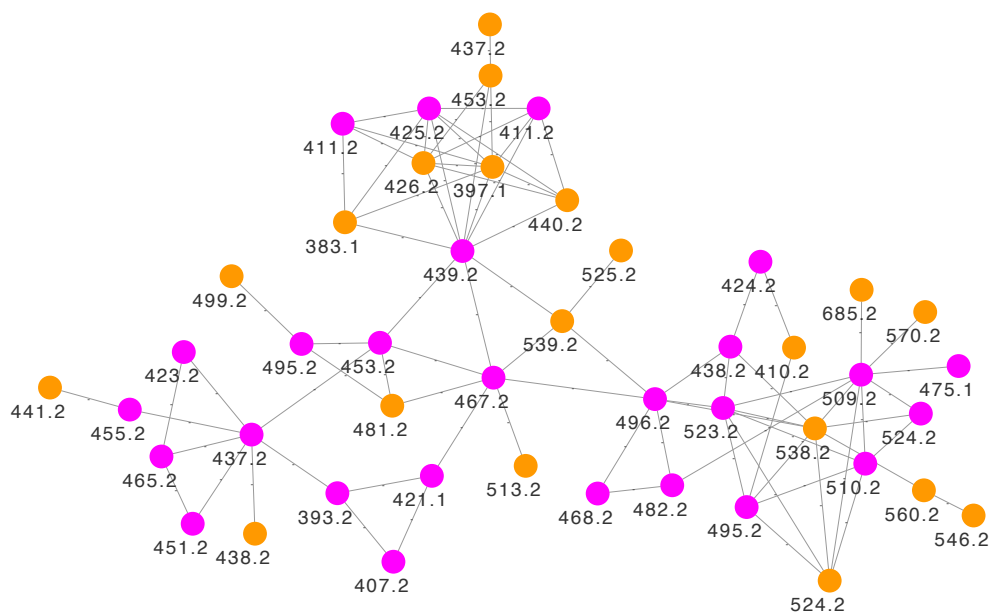

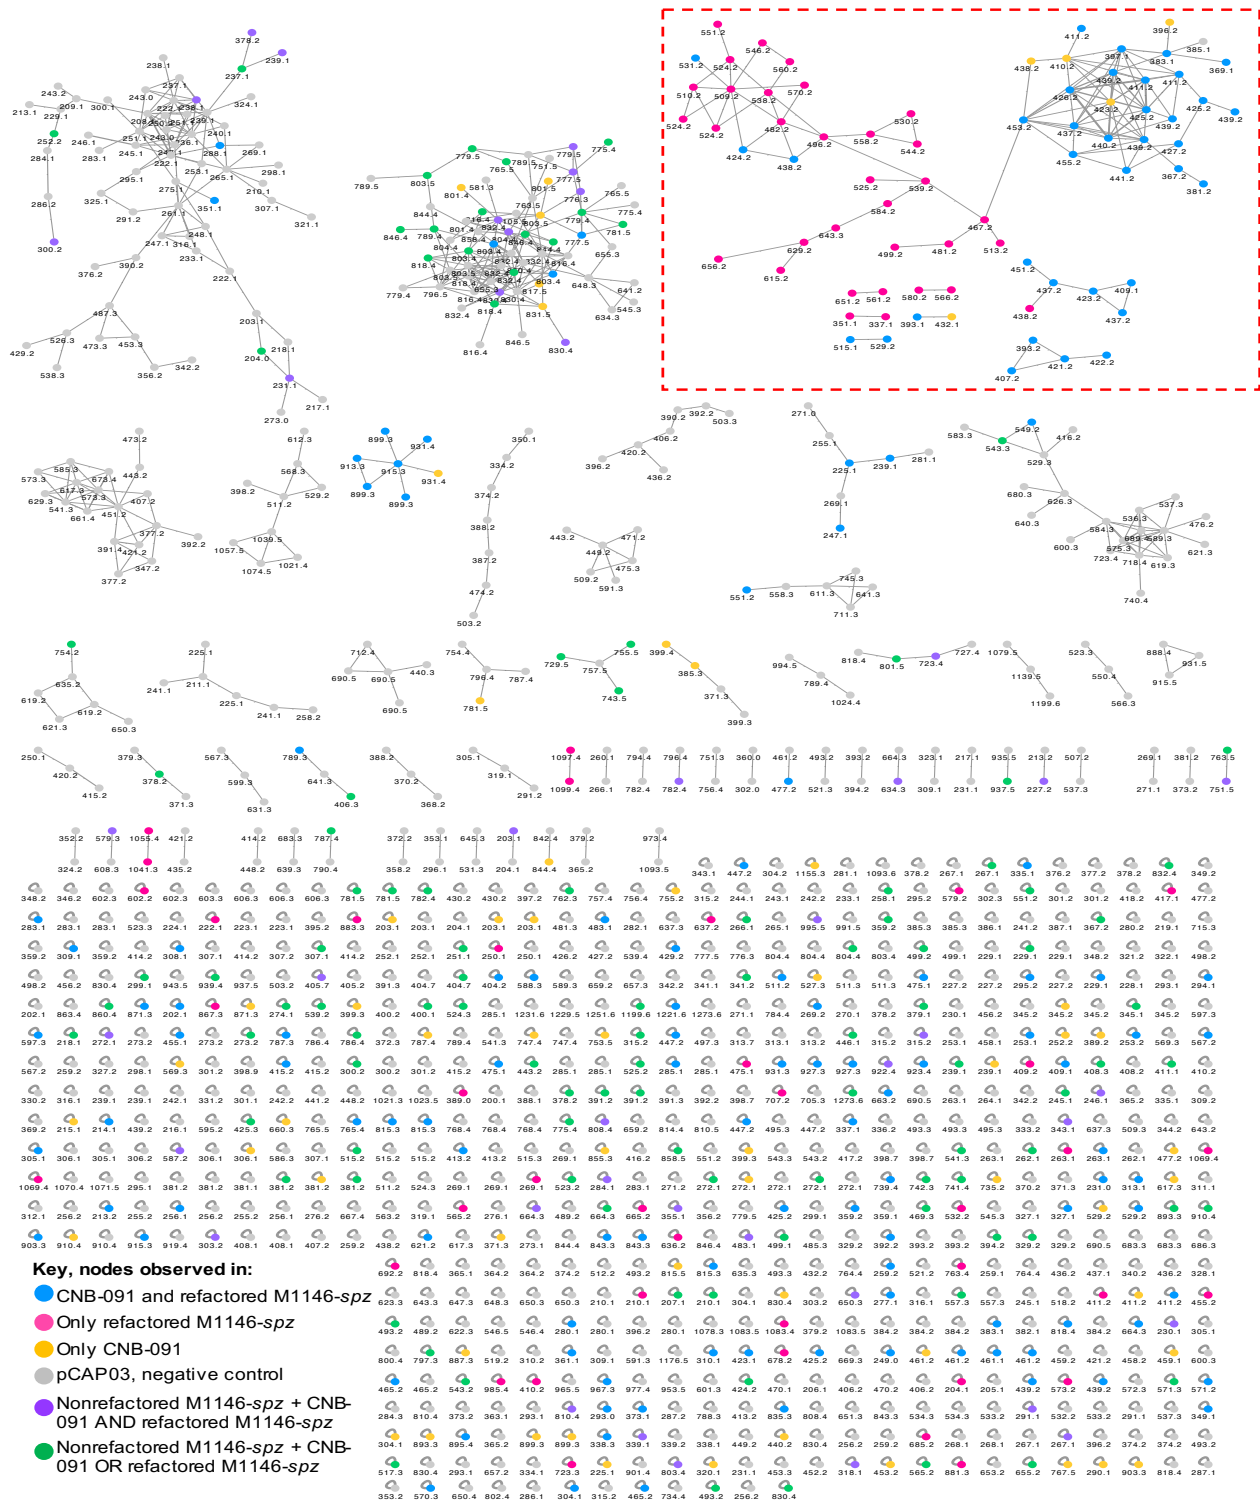

**Figure S4. Molecular network showing production of streptopenazines, related to Figure 4.** LCMS/MS data of ethyl acetate extracts from CNB-091, M1146-pCAP03, M1146-pKDB01 (non-refactored *spz* BGC) and M1146-pKDB03 (refactored *spz* BGC) were used for network generation. Nodes corresponding to streptopenazines highlighted in red square.

**A**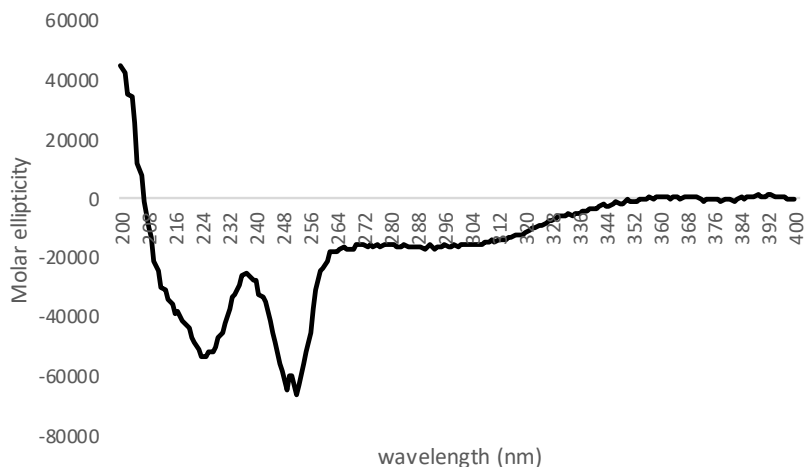**B**

```

Spz7_KR      ...-D1VYWAHL2PDT--VTPVEEILAAL3LDD4LVRAGKILHAGLSNFP5AWRV...
Ery1_KR      ...---LGGIGDDVPLSAVFHAAAT6LDD7GT-VDTLTGERIERASRAKVL...
SlnA1_KR     ...---LLDRIPEAHPLTGVFHAAGV8LDD9GM-VGALSAERLDAVLRPKTD...
RifA_KR      ...LEAVLRAIPA10EHPLTAVIHTAGV11LDD12GV-VTELT13PDRLATVRRPKVD...
AmphJ_KR     ...---LLASVPAEHPLTAVVHTAGV14LDD15GI-FPSLT16PDRLDSVMPKVD...
TlmH_KR     ...---VLAQIRSRGPIGGVVHAAGL17LDD18SI-LANMTPEQLHRVLR19SKVD...

```

**Figure S5. Confirmation of stereochemistry at C-1' position of compound 18, related to Figure 1. A.** Circular dichroism (CD) spectrum of streptopenazine G (**18**). **B.** Alignment of type I PKS KR domains and Spz7. Amino acid residues (LDD motif) defining Spz7 as type B KR are highlighted. Ery1 = erythromycin, SlnA1 = salinomycin, RifA = rifamycin, AmphJ = amphotericin, TlmH = thiolactomycin.

**A****Sequence search results**[Show](#) the detailed description of this results page.

We found 2 Pfam-A matches to your search sequence (all significant)

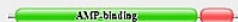[Show](#) the search options and sequence that you submitted.[Return](#) to the search form to look for Pfam domains on a new sequence.**Significant Pfam-A Matches**[Show](#) or [hide](#) all alignments.

| Family        | Description                          | Entry type | Clan   | Envelope |     | Alignment |     | HMM  |     | HMM length | Bit score | E-value | Predicted active sites | Show/hide alignment  |
|---------------|--------------------------------------|------------|--------|----------|-----|-----------|-----|------|-----|------------|-----------|---------|------------------------|----------------------|
|               |                                      |            |        | Start    | End | Start     | End | From | To  |            |           |         |                        |                      |
| AMP-binding   | AMP-binding enzyme                   | Family     | CL0378 | 19       | 441 | 19        | 440 | 1    | 422 | 423        | 287.3     | 1.6e-85 | n/a                    | <a href="#">Show</a> |
| AMP-binding_C | AMP-binding enzyme C-terminal domain | Domain     | CL0531 | 449      | 525 | 449       | 525 | 1    | 76  | 76         | 43.6      | 4.3e-11 | n/a                    | <a href="#">Show</a> |

**B**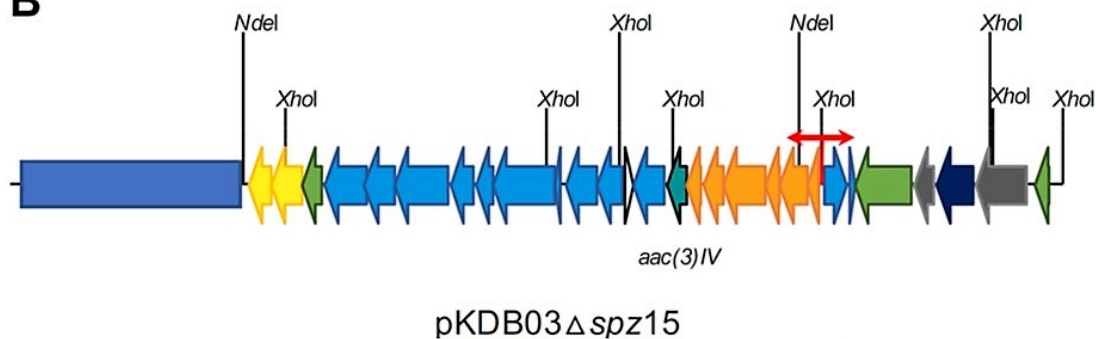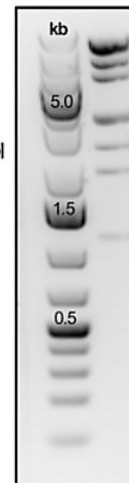**C**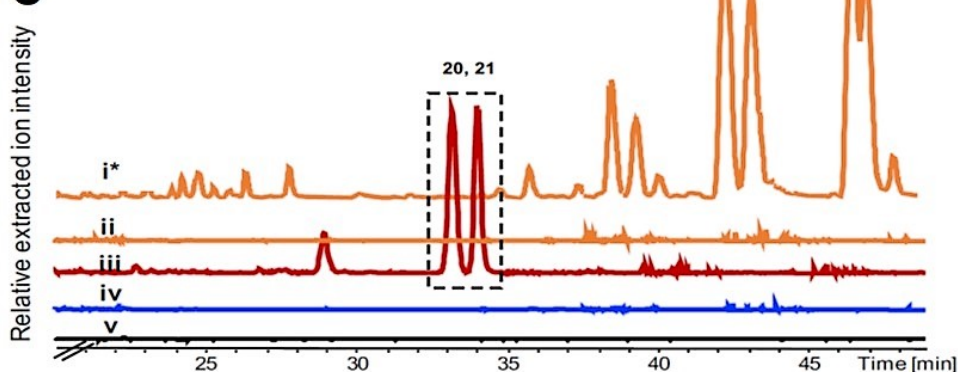

**Figure S6. Bioinformatic analysis and gene deletion of *spz15*, related to Figures 5 and 6.** **A.** Protein family (Pfam) analysis of *Spz15*. Identified CL00378 AMP-binding domain which is characteristic for ANL superfamily of enzymes that includes adenylation domains. **B.** Restriction digest of pKDB03Δ*spz15* with *XhoI* and *NdeI* restriction enzymes. Expected sizes (kb): 11.7, 10.5, 7.5, 5.6, 3.2, 3.1, 2.3, 1.9, 1.1, 0.1. **C.** LCMS chromatograms: (i) Base Peak Chromatogram (BPC) of M1146-pKDB03Δ*spz15* \*zoomed out 100x, (ii) Extracted Ion Chromatogram (EIC) (*m/z* 510.2, corresponding to compounds **20** and **21**) of M1146-pKDB03Δ*spz15*, (iii) M1146-pKDB03 EIC (*m/z* 510.2), (iv) CNB-091 EIC (*m/z* 510.2), and (v) M1146-pCAP03 EIC (*m/z* 510.2).

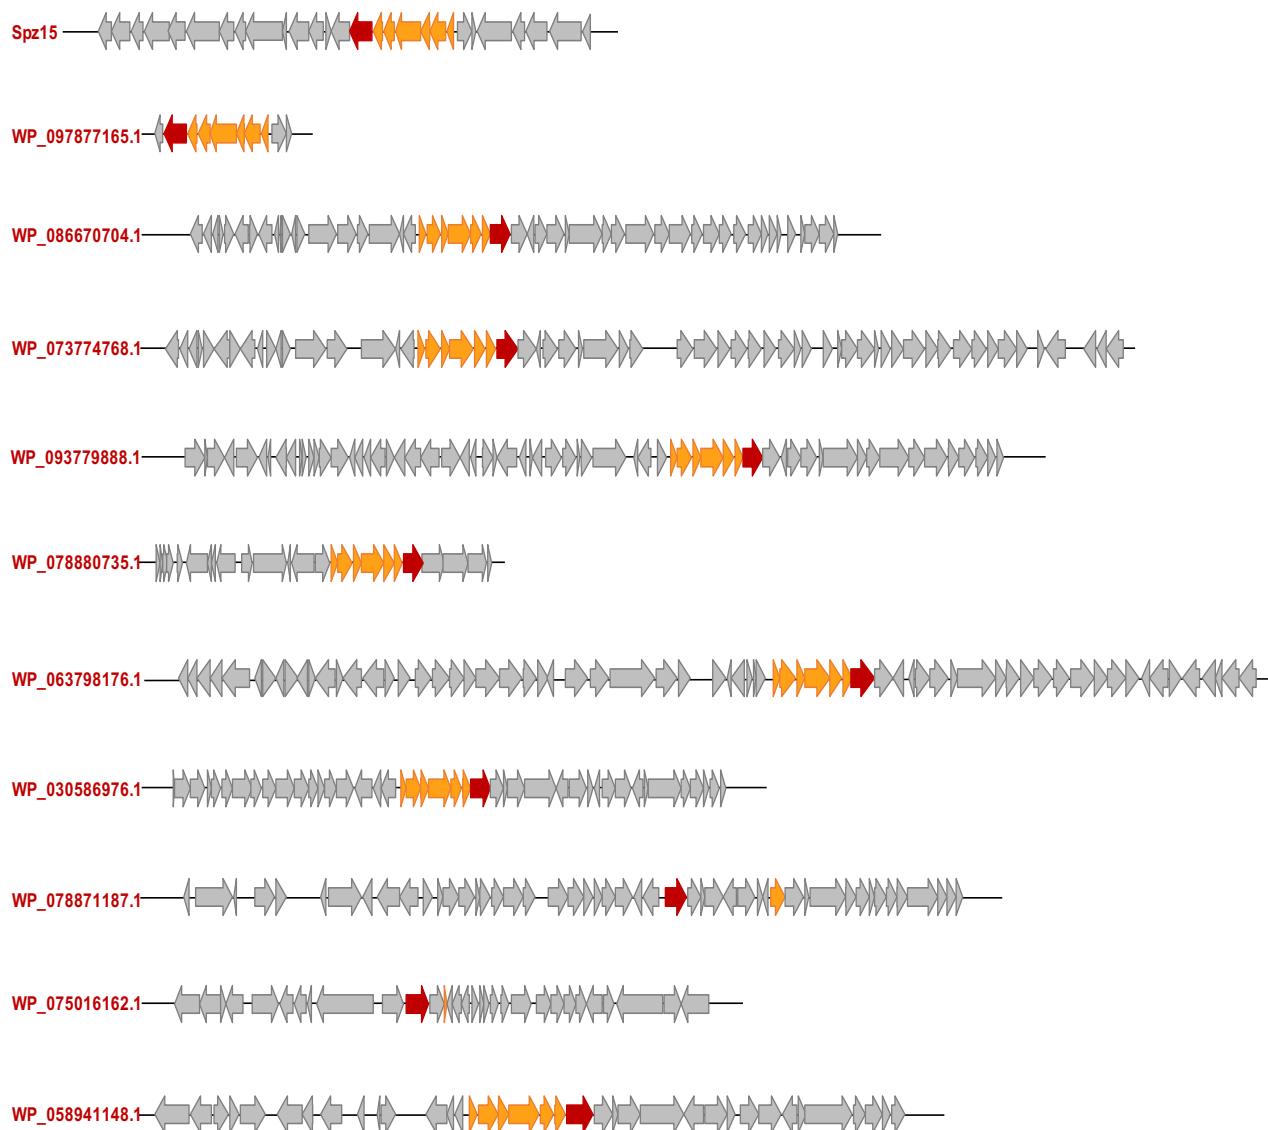

**Figure S7. antiSMASH predicted gene neighborhoods of *phz*-associated discrete adenylation proteins, related to Figure 5.** Red gene = adenylation enzyme homolog found through blastp, orange genes = phenazine biosynthesis homologs. Spz15 = from *Streptomyces* sp. CNB-091, WP\_097877165.1 = from *Streptomyces* sp. ms184, WP\_086670704.1 = from *Streptomyces albovinaceus*, WP\_073774768.1 = from *Streptomyces* sp. TSRI0445, WP\_093779888.1 = from *Streptomyces* sp. yr375, WP\_078880735.1 = from *Kitasatospora purpeofusca*, WP\_063798176.1 = from *Streptomyces* sp. 150FB, WP\_030586976.1 = from *Streptomyces anulatus*, WP\_078871187.1 = from *Streptomyces caatingaensis*, WP\_075016162.1 = from *Streptomyces rubidus*, WP\_058941148.1 = from *Streptomyces kanasensis*.

**Table S1, related to Figures 2, 3 and Method Details.** Promoter cassette sequences used for refactoring. Bold = restriction site, italic = added for scar, blue = FRT site, red = antibiotic resistance, green = promoter, purple = *actII-ORF4*.

| Cassette        | Sequence                                                                                                                                                                                                                                                                                                                                                                                                                                                                                                                                                                                                                                                                                                                                                                                                                                                                                                                                                                                                                                                                                                                                                                                                                                                                                                                                                                                                                                                                                                                                                                                                                                                                                                                                                                                                                                                                                                                                                                                                                                                                                                                                                                                                                                                                                                                                                                 |
|-----------------|--------------------------------------------------------------------------------------------------------------------------------------------------------------------------------------------------------------------------------------------------------------------------------------------------------------------------------------------------------------------------------------------------------------------------------------------------------------------------------------------------------------------------------------------------------------------------------------------------------------------------------------------------------------------------------------------------------------------------------------------------------------------------------------------------------------------------------------------------------------------------------------------------------------------------------------------------------------------------------------------------------------------------------------------------------------------------------------------------------------------------------------------------------------------------------------------------------------------------------------------------------------------------------------------------------------------------------------------------------------------------------------------------------------------------------------------------------------------------------------------------------------------------------------------------------------------------------------------------------------------------------------------------------------------------------------------------------------------------------------------------------------------------------------------------------------------------------------------------------------------------------------------------------------------------------------------------------------------------------------------------------------------------------------------------------------------------------------------------------------------------------------------------------------------------------------------------------------------------------------------------------------------------------------------------------------------------------------------------------------------------|
| <i>sp44-p21</i> | <p> <b>CTCGAGGGTGAACCGATCTCCTCGTTAGGGTCAACCCAGACTTTACAACCCGCACAGCATGT</b><br/> <b>TGTCAAAGCAGAGACGGTTTGAATGTGAACA</b>GCCACTAT<b>CATATG</b>TGCAGTTC<b>GAAGTTCCTAT</b><br/> <b>TCTCTAGAAAGTATAGGA</b>ACTTCGGTTCATGTGCAGCTCCATCAGCAAAGGGGATGATAAGTT<br/> TATCAACCACCGACTATTTGCAACAGTGCCGTTGATCGTGTATGATCGACTGATGTCATCAGCG<br/> GTGGAGTGCAATGTCGTGCAATACGAATGGCGAAAAGCCGAGCTCATCGGTGAGCTTCTCAAC<br/> CTTGGGGTTACCCCCGGCGGTGTGCTGCTGGTCCACAGCTCCTTCCGTAGCGTCCGGCCCT<br/> CGAAGATGGGCCACTTGACTGATCGAGGCCCTGCGTGTGCGTGGTCCGGGAGGGACG<br/> CTCGTCATGCCCTCGTGGTCAGGTCTGGACGACGAGCCGTTGATCCTGCCACGTCCGCCGT<br/> TACACCGGACCTTGAGTTGTCTTGACACATTCTGGCGCCTGCCAAATGTAAAGCGCAGCGC<br/> CCATCCATTTGCCTTGGCGGACGCGGGCCACAGGCAGAGCAGATCATCTCTGATCCATTGCC<br/> CCTGCCACCTCACTCGCTGCAAGCCCGGTGCCCGTGTCCATGAACTCGATGGGCAGGTAT<br/> TTCTCCTCGGCGTGGGACACGATGCCAACACGACGCTGCATCTTGCCGAGTTGATGGCAAAG<br/> GTTCCCTATGGGGTCCGAGACACTGCACCATTCTCAGGATGGCAAGTTGGTACGCGTCGAT<br/> TATCTCGAGAATGACCACTGCTGTGAGCGCTTGCCTTGGCGGACAGGTGGCTCAAGGAGAA<br/> GAGCCTTCAGAAGGAAGGTCCAGTCGGTCATGCCTTGTCTCGGTTGATCCGCTCCCGCGACAT<br/> TGTGGCGACAGCCCTGGGTCAACTGGGCCGAGATCCGTTGATCTTCTGCATCCGCCAGAGG<br/> CGGGATGCGAAGAATGCGATGCCGCTCGCCAGTCGATTGGCTGA<b>GAAGTTCCTATTCTCTAGA</b><br/> <b>AAGTATAGGA</b>ACTTC<b>AAGCTTTGCTCGAG</b>TGTGCGGGCTCTAACACGTCCTAGTATGGTAGGA<br/> <b>TGAGCAATCTAGTCGAGCAACGGAGGTACGGACCATATG</b> </p>                                                                                                                                                                                                                                                                                                                                                                                                                                                                                                                                                                                                                                                                                                                                                                                                                                                                                                                                                                                      |
| <i>actIp</i>    | <p> <b>CTCGAGGGTTCATGTGCAGCTCCATCAGCAAAGGGGATGATAAGTTTATCAACCACCGACTAT</b><br/> TTGCAACAGTGCCGTTGATCGTGTATGATCGACTGATGTCATCAGCGGTGGAGTGCAATGTC<br/> GTGCAATACGAATGGCGAAAAGCCGAGCTCATCGGTGAGCTTCTCAACCTTGGGGTTACCCCC<br/> GGCGGTGTGCTGCTGGTCCACAGCTCCTTCCGTAGCGTCCGGCCCTCGAAGATGGGCCACT<br/> TGGACTGATCGAGGCCCTGCGTGTGCGTGGTCCGGGAGGGACGCTCGTCTATGCCCTCG<br/> TGTCAGGTCTGGACGACGAGCCGTTGATCCTGCCACGTCCGCCGTTACACCGGACCTTGG<br/> AGTTGTCTTGACACATTCTGGCGCCTGCCAAATGTAAAGCGCAGCGCCCATCCATTTGCCTT<br/> GCGGACGCGGGCCACAGGCAGAGCAGATCATCTGATCCATTGCCCTGCCACCTCACTC<br/> GCCTGCAAGCCCGGTGCGCCGTGTCCATGAACTCGATGGGCAGGTACTTCTCCTCGGCGTGG<br/> GACACGATGCCAACACGACGCTGCATCTTGCCGAGTTGATGGCAAAGGTTCCCTATGGGGTG<br/> CCGAGACACTGCACCATTCTCAGGATGGCAAGTTGGTACGCGTCGATTATCTCGAGAATGAC<br/> CACTGCTGTGAGCGCTTGCCTTGGCGGACAGGTGGCTCAAGGAGAAGAGCCTTCAGAAGGA<br/> AGGTCCAGTCGGTCATGCCTTGTCTCGGTTGATCCGCTCCCGCGACATTGTGGCGACAGCCCT<br/> GGGTCAACTGGGCCGAGATCCGTTGATCTTCTGCATCCGCCAGAGGCGGGATGCGAAGAAT<br/> GATGCCGCTCGCCAGTCGATTGGCTGA<b>CATATG</b>CCACTGCCTCTCGGTAATAATCCAGCAAA<br/> AATTAATCAGTGACGCTCGCTGCACTGATTAATTTTTGATCAATAGGAGATCGCTTGTGACGGC<br/> AAGCACATTGAAATCTGTTGAGTAGGCCTGTTATTGTGCGCCCCAGGAGACGGAGAATCTCGA<br/> CGGGGGCGCAGATGAGATTCAACTTATTGGGACGTGTCCATGTAATCACCGATGCGGGATGTG<br/> TAATTCGGCTTAAATCCTCGAAGGCGACCCAGCTCCTGGTGTGCTGCTCCTCAGGCGGCACG<br/> AGGTGGTGGGATCGGGGGTGTCTATCGAGGAGTTGTGGGCGGACCACCCGCCCGCAGCGC<br/> CATGACGACGCTGCAGACGTACGTGTACCACACCCGCCGGTGTGTTGGGGGAGCACCGGGTG<br/> ACGAGCGACGACCGGGAATTGGTCTGACCCAGCCGCGCCGGCTACTTCGCCCTGATCGACGA<br/> GGACGAATCGACGTCGCGGTGCGCCGAGCGTGTATCCGCACCGGCGCCGGCTGCTCGAG<br/> GAGAACCGGCTCGAGGAGGCGCTCGCCTCGTTGGACGCGGGACTGGATCTCTGGCGAGGCC<br/> CGGCGCTGTCCACCGTACCGTGC GGCCGGGTGCTCGAAAGCAATATCGCGCACCTGGAAGAG<br/> CTGCGGCTTTTTGGAATGCAGCTCCGTATCGACGCGAATTGGCGGCTGGGCAGAATAGGGCC<br/> GATGATTCGGAACTCCGGTCCCTGGTAATTTTCGCATCCGCTGAACGAGACCCTGCACGCCAA<br/> ACTGATGGGCGCGCTCTGTGAGATGGGCAGGCGCGCCGAGGCGCTGGAATCGTATCGGAATC<br/> TCCGGCGGATACTGTCCGACGAAGTGGGGTGGATCCGACGCCGGAATCCAGCGTATGAC<br/> ATGGAATTCACCGGTGAGAAGGTGCTCGTGTAGCACCGGTCCGTGAACCGTGGAGGCC<br/> CTATGTCTCTTAAGT<b>GTTC</b>CCCTCCCTGCCTCGTGGTCCCTCACGCGCTCAGCTTTGGGCGCC<br/> CGGCTCGAGCGGCGGTGCAAGGGAGATGGGGTGC CGCTGGACGCGGGCGCCGGTGGATCCG<br/> GCATCGAGGGGTCCCGTATCGGCCTTCGAGCCTCCTTCGAGCCACGGGGCCGACGATGACGA<br/> CGACCACCGGACGAACGCATC </p> |



*ermE*\*p

ATGGGGACCTCCTGGGGTGC GTTGGACCGCTGGATCCTACCAACCGGCACGATTGTGCCAC  
AACAGCATCGCGGTGCCACGTGTGGACCGCGTCGGTCAGATCCTCCCCGCACCTCTCGCCAG  
CCGTCAAGATCGACCGCGTGCACCA**CATATG**TTACCAATGCTTAATCAGTGAGGCACCTATCT  
CAGCGATCTGTCTATTTTCGTTTCATCCATAGTTGCCTGACTCCCCGTCGTGTAGATAACTACGAT  
ACGGGAGGGCTTACCATCTGGCCCCAGTGTGCAATGATACCGCGAGACCCACGCTCACCGG  
CTCCAGATTTATCAGCAATAAACAGCCAGCCGGAAGGGCCGAGCGCAGAAGTGGTCCTGCA  
ACTTTATCCGCCTCCATCCAGTCTATTAATTGTTGCCGGGAAGCTAGAGTAAGTAGTTCCGCCAG  
TTAATAGTTTGCGCAACGTTGTTGCCATTGCTACAGGCATCGTGGTGTACGCTCGTCGTTTGG  
TATGGCTTCATTCAGCTCCGTTCCCAACGATCAAGGCGAGTTACATGATCCCCCATGTTGTGC  
AAAAAGCGGTTAGCTCCTTCGGTCCCTCCGATCGTTGTCAGAAGTAAGTTGGCCGCAGTGTTA  
TCACTCATGGTTATGGCAGCACTGCATAATTCTCTTACTGTGCATGCCATCCGTAAGATGCTTTTC  
TGTGACTGGTGAGTACTCAACCAAGTCATTCTGAGAATAGTGTATCGGGCACCAGTTGCTC  
TTGCCCGCGTCAATACGGGATAATACCGCGCCACATAGCAGAACCTTTAAAAGTGTCTCATCT  
GGAAAACGTTCTTCGGGGCGAAAACCTCTCAAGGATCTTACCCTGTTGAGATCCAGTTTCGATG  
TAACCCACTCGTGCACCCAACCTGATCTTCAGCATCTTTTACTTTACCAGCGTTTCTGGGTGAG  
CAAAAACAGGAAGGCAAAATGCCGCAAAAAGGGAATAAGGGCGACACGGAAATGTTGAATAC  
TCATACTCTTCCTTTTTCAATCATGATTGAAGCATTATCAGGGTTATTGTCTCATGAGCGGATA  
CATATTTGAATGCTCGAG

**Table S3, related to STAR Methods section “Bioactivity testing of streptophenazines and MIC determination”** Minimum Inhibitory Concentrations (MICs) ( $\mu\text{g/mL}$ ) of oxo-streptophenazine A (**9**), streptophenazine C (**13**), streptophenazine A (**16**), and streptophenazine Q (**20**).

| Strain                              | Compound 9 | 13  | 16  | 20  |
|-------------------------------------|------------|-----|-----|-----|
| Group A <i>Streptococcus</i>        | >50        | >50 | >50 | 2.5 |
| <i>Acinetobacter baumannii</i> 5075 | >50        | >50 | >50 | 40  |
| <i>Klebsiella pneumoniae</i> 1100   | >50        | >50 | >50 | >40 |
| MRSA TCH1516                        | >50        | >50 | >50 | 40  |

**Table S4, related to STAR methods. Plasmids and strains used in this work**

| Plasmids                                               | Description                                                                                                                                                                   | Sources                        |
|--------------------------------------------------------|-------------------------------------------------------------------------------------------------------------------------------------------------------------------------------|--------------------------------|
| pCAP03                                                 | TAR cloning and broad-host-range heterologous expression vector; <i>CEN6-ARS4, oriT, traJ, pUC ori, Kan<sup>r</sup>, Apra<sup>r</sup>, pADH1, URA3, TRP1</i>                  | Tang <i>et al.</i> , 2014      |
| pSMM                                                   | Derivative of pCAP03 with 48 kb captured <i>spz</i> cluster                                                                                                                   | This work                      |
| pKDB01                                                 | Derivative of pCAP03 with 37.5 kb captured <i>spz</i> cluster                                                                                                                 | This work                      |
| pKDB02                                                 | Derivative of pKDB01 without TetR regulatory gene ( <i>spz28</i> )                                                                                                            | This work                      |
| pKDB01 $\Delta$ <i>spz3</i>                            | Derivative of pKDB01 without <i>spz3</i> (LysR type regulatory gene)                                                                                                          | This work                      |
| pKDB02 $\Delta$ <i>spz3</i>                            | Derivative of pKDB02 without <i>spz3</i> (LysR type regulatory gene)                                                                                                          | This work                      |
| pKDB01- <i>ermE</i> * <i>p-spz24</i>                   | Derivative of pKDB01 with <i>ermE</i> * promoter in front of <i>spz24</i> (LuxR-type regulatory gene), <i>Kan<sup>r</sup>, Amp<sup>r</sup></i>                                | This work                      |
| pKDB03                                                 | Derivative of pKDB01 with <i>sp44-p21</i> cassette                                                                                                                            | This work                      |
| pKDB04                                                 | Derivative of pKDB03 with <i>actIp</i> cassette                                                                                                                               | This work                      |
| pKDB05                                                 | Derivative of pKDB04 with <i>ermE</i> * <i>p</i> cassette                                                                                                                     | This work                      |
| pKDB03 $\Delta$ <i>spz15</i>                           | Derivative of pKDB03 with <i>spz15</i> (putative adenylation protein-encoding gene) deleted                                                                                   | This work                      |
| pCAP03- <i>ermE</i> * <i>p</i>                         | Derivative of pCAP03 containing <i>ermE</i> * <i>p</i> cassette between XhoI and NdeI, <i>Kan<sup>r</sup>, Amp<sup>r</sup></i>                                                | This work                      |
| pCAP03- <i>actIp</i>                                   | Derivative of pCAP03 containing <i>actIp</i> cassette between XhoI and NdeI, <i>Kan<sup>r</sup>, Apra<sup>r</sup></i>                                                         | This work                      |
| pCAP03- <i>sp44-p21</i>                                | Derivative of pCAP03 containing <i>sp44-p21</i> cassette between XhoI, NdeI, <i>Kan<sup>r</sup>, Apra<sup>r</sup></i>                                                         | This work                      |
| pIJ790                                                 | $\lambda$ -RED ( <i>gam, bet, exo</i> ), <i>cat, araC</i> , rep101 <sup>ts</sup> , oriR101, P araBAD                                                                          | Gust, 2003                     |
| pUB307                                                 | Self-transmissible plasmid that mobilizes other plasmids <i>in trans</i> for DNA transfer into hosts: RP4, <i>neo</i>                                                         | Flett, 1997                    |
| Strains                                                | Description                                                                                                                                                                   |                                |
| <b><i>Streptomyces</i></b>                             |                                                                                                                                                                               |                                |
| <i>Streptomyces sp.</i> CNB-091                        | Native producer of streptopenazines                                                                                                                                           | Trischman <i>et al.</i> , 1994 |
| <i>Streptomyces coelicolor</i> M1146                   | Host strain for heterologous expression derived from <i>S. coelicolor</i> M145: $\Delta$ <i>act, <math>\Delta</math>red, <math>\Delta</math>cpk, <math>\Delta</math>cda</i> . | Gomez-Escribano and Bibb, 2011 |
| <i>S. coelicolor</i> M1146-pCAP03                      | Heterologous host containing empty pCAP03 as a control                                                                                                                        | This work                      |
| <i>S. coelicolor</i> M1146-pSMM                        | Heterologous host containing pSMM ( <i>spz</i> BGC captured in 48 kb DNA fragment)                                                                                            | This work                      |
| <i>S. coelicolor</i> M1146-pKDB01                      | Heterologous host with integrated pKDB01 (37.5 kb captured <i>spz</i> cluster)                                                                                                | This work                      |
| <i>S. coelicolor</i> M1146-pKDB02                      | Heterologous host with integrated pKDB02 ( $\Delta$ <i>spz28</i> )                                                                                                            | This work                      |
| <i>S. coelicolor</i> M1146-pKDB01 $\Delta$ <i>spz3</i> | Heterologous host with integrated pKDB01 $\Delta$ <i>spz3</i>                                                                                                                 | This work                      |
| <i>S. coelicolor</i> M1146-pKDB02 $\Delta$ <i>spz3</i> | Heterologous host with integrated pKDB02 $\Delta$ <i>spz3</i>                                                                                                                 | This work                      |

|                                                                 |                                                                                                                                                                                                                                                                                                                                                                                                                      |                                  |
|-----------------------------------------------------------------|----------------------------------------------------------------------------------------------------------------------------------------------------------------------------------------------------------------------------------------------------------------------------------------------------------------------------------------------------------------------------------------------------------------------|----------------------------------|
| <i>S. coelicolor</i> M1146-pKDB01- <i>ermE</i> * <i>p-spz24</i> | Heterologous host with integrated pKDB01- <i>ermE</i> * <i>p-spz24</i>                                                                                                                                                                                                                                                                                                                                               | This work                        |
| <i>S. coelicolor</i> M1146-pKDB03                               | Heterologous host with integrated pKDB03                                                                                                                                                                                                                                                                                                                                                                             | This work                        |
| <i>S. coelicolor</i> M1146-pKDB04                               | Heterologous host with integrated pKDB04                                                                                                                                                                                                                                                                                                                                                                             | This work                        |
| <i>S. coelicolor</i> M1146-pKDB05                               | Heterologous host with integrated pKDB05                                                                                                                                                                                                                                                                                                                                                                             | This work                        |
| <i>S. coelicolor</i> M1146-pKDB03 $\Delta$ <i>spz15</i>         | Heterologous host with integrated pKDB03 $\Delta$ <i>spz15</i>                                                                                                                                                                                                                                                                                                                                                       | This work                        |
| <b><i>Escherichia coli</i></b>                                  |                                                                                                                                                                                                                                                                                                                                                                                                                      |                                  |
| DH10B                                                           | F- <i>mcrA</i> $\Delta$ ( <i>mrr-hsdRMS-mcrBC</i> ), $\Phi$ 80 <i>lacZ</i> $\Delta$ M15, $\Delta$ <i>lacX74 recA1 endA1 araD139 <math>\Delta</math> (<i>ara leu</i>)7697 <i>galJ galK rpsL nupG</i> <math>\lambda</math>-. Storage and maintenance</i>                                                                                                                                                               |                                  |
| BW25113                                                         | K-12 derivative: $\Delta$ <i>araBAD</i> , $\Delta$ <i>rhaBAD</i> ,                                                                                                                                                                                                                                                                                                                                                   | Datsenko and Wanner, 2000        |
| BT340                                                           | DH5 $\alpha$ /pCP20, containing FLP recombinase                                                                                                                                                                                                                                                                                                                                                                      | Cherepanov and Wackernagel, 1995 |
| ET12567                                                         | F- <i>dam13</i> ::Tn9, <i>dcm6</i> , <i>hsdM</i> , <i>hsdR</i> , <i>recF</i> ,143 <i>zjj-202</i> ::Tn10, <i>galK2</i> , <i>galT22</i> , <i>ara-14</i> , <i>pacY1</i> , <i>xyl-5</i> , <i>leuB6</i> , <i>thi-1</i> , <i>tonA31</i> , <i>rpsL136</i> , <i>hisG4</i> , <i>tsx-78</i> , <i>mtl-1</i> , <i>glnV44</i> . Donor strain for conjugation between <i>E. coli</i> and <i>Streptomyces</i> in triparental mating | MacNeil et al., 1992             |
| <b>Other</b>                                                    |                                                                                                                                                                                                                                                                                                                                                                                                                      |                                  |
| Group A <i>Streptococcus</i>                                    | Clinical isolate used for bioactivity assays                                                                                                                                                                                                                                                                                                                                                                         | Nizet lab,UCSD                   |
| <i>Acetobacter baumannii</i> 5075                               | Clinical isolate used for bioactivity assays                                                                                                                                                                                                                                                                                                                                                                         | Nizet lab,UCSD                   |
| <i>Klebsiella pneumoniae</i> 1100                               | Clinical isolate used for bioactivity assays                                                                                                                                                                                                                                                                                                                                                                         | Nizet lab,UCSD                   |
| MRSA TCH1516                                                    | Clinical isolate used for bioactivity assays                                                                                                                                                                                                                                                                                                                                                                         | Nizet lab,UCSD                   |
| <i>S. cerevisiae</i> VL6-48N                                    | MAT $\alpha$ <i>trp1</i> - $\Delta$ 1 <i>ura3</i> - $\Delta$ 1 <i>ade2</i> -101 <i>his3</i> - $\Delta$ 200 <i>lys2 met14</i> <i>cir</i> <sup>o</sup> , TAR cloning                                                                                                                                                                                                                                                   | Kouprina and Larinova, 2016      |

---

**Table S5, related to STAR methods. Primers used in this work.**

| Primer name                     | Sequence (5' to 3')                                                                                                                                                | Purpose                                                                                       |
|---------------------------------|--------------------------------------------------------------------------------------------------------------------------------------------------------------------|-----------------------------------------------------------------------------------------------|
| <b>Frag1_F</b>                  | GAGTAGCAGCACGTTTCCTTATATGTAGCTTTCGACAT<br>ATGCATGAGCTGTCTCCTGGTGTGGTGGGCAGG                                                                                        | TAR cloning <i>spz</i> BGC                                                                    |
| <b>Frag1_R</b>                  | CGACCTGCCCCAACTCGACGGGCTGGAAGT                                                                                                                                     | TAR cloning <i>spz</i> BGC                                                                    |
| <b>Frag2_F</b>                  | CACGATGCCCAGCAGCAGTCCCATGTCGTGG                                                                                                                                    | TAR cloning <i>spz</i> BGC                                                                    |
| <b>Frag2_R</b>                  | GCATCCAGTGCAGTACAGCCTCGCCGAGCG                                                                                                                                     | TAR cloning <i>spz</i> BGC                                                                    |
| <b>Frag3_F</b>                  | CCAGGTAATCCTCCAAGTCTCGCCGGTCCG                                                                                                                                     | TAR cloning <i>spz</i> BGC                                                                    |
| <b>Frag3_R</b>                  | CTCATAAGGATGCCTTCTGCGGGTGTGGAGACC                                                                                                                                  | TAR cloning <i>spz</i> BGC                                                                    |
| <b>Frag4_F</b>                  | CGATCGCCGCTGACCGACTGGAGCAGG                                                                                                                                        | TAR cloning <i>spz</i> BGC                                                                    |
| <b>Frag4_R</b>                  | GCTGCCGCTGAACGCCAACGGGAAGGTGGAC                                                                                                                                    | TAR cloning <i>spz</i> BGC                                                                    |
| <b>Frag5_F</b>                  | GAGGGCGGTCAGGGCAGGATTCACGGAATGC                                                                                                                                    | TAR cloning <i>spz</i> BGC                                                                    |
| <b>Frag5_R</b>                  | GGAGGCAGGCGCTACTGGACGTTCCCTCATCC                                                                                                                                   | TAR cloning <i>spz</i> BGC                                                                    |
| <b>Frag6_F</b>                  | CCATCATCTTGAGCTCTTCGTGACGACCATG                                                                                                                                    | TAR cloning <i>spz</i> BGC                                                                    |
| <b>Frag6_R</b>                  | GAACCAGGAGATCGCCGACGGCTCGTCT                                                                                                                                       | TAR cloning <i>spz</i> BGC                                                                    |
| <b>Frag7_F</b>                  | CTCGGCCTGGAATCACTTCAGATGATGCGCCTG                                                                                                                                  | TAR cloning <i>spz</i> BGC                                                                    |
| <b>Frag7_R</b>                  | GTTCTGATCGCCAGTTCCTGCAGAGCGTG                                                                                                                                      | TAR cloning <i>spz</i> BGC                                                                    |
| <b>Frag8_F</b>                  | GTCCTCCGACGAACATCAGGATGGAGCCG                                                                                                                                      | TAR cloning <i>spz</i> BGC                                                                    |
| <b>Frag8_R+TetR</b>             | CTCGGTTTGACGCCTCCCATGGTATAAATAGTGGCTC<br>GAGGCACAGGACGGCATCGCCCGAGCTGAGC                                                                                           | TAR cloning <i>spz</i> BGC                                                                    |
| <b>Frag8_R-TetR</b>             | CTCGGTTTGACGCCTCCCATGGTATAAATAGTGGCTC<br>GAGGGTCCGTCCGGTCCCAGGAGAACCAGCTGATC<br>GGCTTGCGGAGAGACCGGGCGGGGATCAGCCGAGG<br>AGGGCGCGGCGTGTACGCCAATCGACTGGCGAGC<br>GGCAT | TAR cloning <i>spz</i> BGC                                                                    |
| <b>Δ<i>spz3</i>_F</b>           | GCTCGTCGCACCGTCGCCCGCTCCTGAACCGGCC<br>GCGGGGAAGGACCACGGTTCATGTGCAGCTCCATCA<br>GCAAAAG                                                                              | Delete <i>spz3</i> (LysR)                                                                     |
| <b>Δ<i>spz3</i>_R</b>           | GTGAAGGCGACGAACAGGAAGTG                                                                                                                                            | Delete <i>spz3</i> (LysR)                                                                     |
| <b>Δ<i>spz3</i>_seq_F</b>       | GATCGAGCCCGCCGACGTG                                                                                                                                                | Confirm <i>spz3</i> deletion                                                                  |
| <b>Δ<i>spz3</i>_seq_R</b>       | GTCGGGAGCGTGCGGCACAGTGCGCACGTCGGGCA<br>GGACTGGCACGGTTCATATGGGGACCTCCTGGGGTG<br>CGTTGG                                                                              | Confirm <i>spz3</i> deletion                                                                  |
| <b>Upreg-<i>spz24</i>_F</b>     | CCCGATCGTGACGTGCGCGCCGTGCGCCCTAGG<br>CCCTCCGGGCGGACGCTCGAGCATTCAAATATGTAT<br>CCGCTCATG                                                                             | Insert <i>ermE</i> * promoter in front of <i>spz24</i> (LuxR)                                 |
| <b>Upreg-<i>spz24</i>_R</b>     | CAGCAGGCTGCTCTTGCCGACAC                                                                                                                                            | Insert <i>ermE</i> * promoter in front of <i>spz24</i> (LuxR)                                 |
| <b>Upreg-<i>spz24</i>_seq_F</b> | GATGCGCGGTATGTGGGAGCGC                                                                                                                                             | Sequencing to confirm insertion                                                               |
| <b>Upreg-<i>spz24</i>_seq_R</b> | ATTATACATATGTGCAGTTCGAAGTTCCTATTCTCTAG<br>AAAGTATAGGAATTCGGTTCATGTGCAGCTCCATCA<br>GCAAAAG                                                                          | Sequencing to confirm insertion                                                               |
| <b><i>aac(3)IV</i>+FRT_F</b>    | ATTATAAAGCTTGAAGTTCCTATACTTTCTAGAGAATA<br>GGAACCTCTCAGCCAATCGACTGGCGAGCGGCATCG                                                                                     | Amplify <i>aac(3)IV</i> gene with FRT sites for cloning between pET28a NdeI and HindIII sites |
| <b><i>aac(3)IV</i>+FRT_R</b>    | GACGCCTCCCATGGTATAAATAGTGGCTCGAGGGTG<br>AACCGATCTCCTCGTTAGGGTC                                                                                                     | Amplify <i>aac(3)IV</i> gene with FRT sites for cloning between pET28a NdeI and HindIII sites |
| <b><i>sp44</i>_F</b>            | TCTAGAGAATAGGAACCTTCAACTGCACATATGATAG<br>TGGCTGTTACATTTCGAACCGTCTCTG                                                                                               | Amplify <i>sp44</i> promoter with homology to pCAP03 and <i>aac(3)IV</i>                      |
| <b><i>sp44</i>_R</b>            | CTATTCTCTAGAAAGTATAGGAACCTTCAAGCTTGTCT<br>CGAGTGTGCGGGCTCTAACACGTC                                                                                                 | Amplify <i>sp44</i> promoter with homology to pCAP03 and <i>aac(3)IV</i>                      |
| <b><i>p21</i>_F</b>             |                                                                                                                                                                    | Amplify <i>p21</i> promoter with homology to pCAP03 and <i>aac(3)IV</i>                       |

|                                    |                                                                                          |                                                                                                      |
|------------------------------------|------------------------------------------------------------------------------------------|------------------------------------------------------------------------------------------------------|
| <i>p21_R</i>                       | AGCACGTTCTTATATGTAGCTTTGACATATGGTCC<br>GTACCTCCGTTGCTCGACTAGAT                           | Amplify <i>p21</i> promoter with homology to pCAP03 and <i>aac(3)/IV</i>                             |
| <i>aac(3)/IV+FRT_sp44_pCAP03_F</i> | CAGAGACGGTTTGAATGTGAACAGCCACTATCATAT<br>GTGCAGTTTGAAGTTTCTATTCTCTAGA                     | Amplify <i>aac(3)/IV</i> +FRT with homology to <i>sp44</i> promoters                                 |
| <i>aac(3)/IV+FRT_p21_pCAP03_R</i>  | ACGTGTTAGAGCCCCGACACTCGAGCAAAGCTTGAA<br>GTTCTATACTTTCTAGAGAATA                           | Amplify <i>aac(3)/IV</i> +FRT with homology to <i>p21</i> promoter                                   |
| <i>sp44+p21_cas_insert_F</i>       | TGGTCGGCGTCTCTGTTGCTGAACTGATGCTCTGG<br>GCGACGTCGGGCATCTCGAGGGTGAACCGATCTCCT<br>CGTTAGG   | Amplify <i>sp44-p21</i> cassette with homology sequences for targeted insertion into <i>spz</i> BGC  |
| <i>sp44+p21_cas_insert_R</i>       | CCGGGGACGTGGGTGCCGAGTCCGGCGAGGTAGGT<br>GTTCTCGAACTTCATCATATGGTCCGTACCTCCGTTG<br>CTCGAC   | Amplify <i>sp44-p21</i> cassette with homology sequences for targeted insertion into <i>spz</i> BGC  |
| <i>sp44+p21_cas_insert_seq_F</i>   | GTGAACAGGAGATGCCGGGTG                                                                    | Confirm <i>sp44-p21</i> cassette insertion                                                           |
| <i>sp44+p21_cas_insert_seq_R</i>   | GCCTCGTACCAGCCTTCCTG                                                                     | Confirm <i>sp44-p21</i> cassette insertion                                                           |
| <i>actI_p_F</i>                    | CCGGTCCGTGAACGCGGTGGAGCCCTATGTCTCTTA<br>AGTGTTCCTCCCTCCCTGCC                             | Amplify <i>actI</i> promoter with homology to <i>actII-ORF4</i> and pCAP03                           |
| <i>actI_p_R</i>                    | CACGTTCTTATATGTAGCTTTGAGATGCGTTTCGTC<br>CGGTGGTCGTCGTCA                                  | Amplify <i>actI</i> promoter with homology to <i>actII-ORF4</i> and pCAP03                           |
| <i>actII-ORF4_F</i>                | CCGCTCGCCAGTCGATTGGCTGACATATGCCACTGC<br>CTCTCGGTAATAATCC                                 | Amplify <i>actII-ORF4</i> with homology arms for assembly with <i>aac(3)/IV</i> and <i>act1p</i>     |
| <i>actII-ORF4_R</i>                | GGCAGGGAGGGGAACACTTAAGAGACATAGGGCTC<br>CACCGCTTACGCGACCGG                                | Amplify <i>actII-ORF4</i> with homology arms for assembly with <i>aac(3)/IV</i> and <i>act1p</i>     |
| <i>aac(3)/IV+actI_p_F</i>          | GACGCCTCCCATGGTATAAATAGTGGCTCGAGGGTT<br>CATGTGCAGCTCCATCAGCAAAG                          | Amplify <i>aac(3)/IV</i> with homology to <i>actII-ORF4</i> and pCAP03                               |
| <i>aac(3)/IV+actI_p_R</i>          | GGATTTTACCGAGAGGCAGTGGCATATGTCAGCCAA<br>TCGACTGGCGAGCGG                                  | Amplify <i>aac(3)/IV</i> with homology to <i>actII-ORF4</i> and pCAP03                               |
| <i>actI_p_cas_insert_F</i>         | GGGTCCGCGTCGTACGGAAGGTCAAGAATCTTCGGG<br>TCGGCGGAAGCCACGATGCGTTCTCCGGTGGTCTG<br>TCGTC     | Amplify <i>actI_p</i> cassette with homology sequences for targeted insertion into <i>spz</i> BGC    |
| <i>actI_p_cas_insert_R</i>         | GTGCTCGAATGTCCCATACCCCAAGACGTAGAAGT<br>TCTCTGGAGGAACGACTCGAGGGTTCATGTGCAGCT<br>CCATCAG   | Amplify of <i>actI_p</i> cassette with homology sequences for targeted insertion into <i>spz</i> BGC |
| <i>actI_p_cas_insert_seq_F</i>     | CTCGAGCCAGTAGCGGGATC                                                                     | Confirm <i>actI_p</i> cassette insertion within <i>spz</i> BGC                                       |
| <i>actI_p_cas_insert_seq_R</i>     | CATTGTGCACGGTCCACCG                                                                      | Confirm <i>actI_p</i> cassette insertion within <i>spz</i> BGC                                       |
| <i>ermE*p_F</i>                    | GTGCCTCACTGATTAAGCATTGGTAACATATGTGGTG<br>CACGCGGTGATCTTGACGGCTG                          | Amplify <i>ermE*</i> promoter with homology arms for assembly with <i>bla</i> and pCAP03             |
| <i>ermE*p_R</i>                    | CAGCACGTTCTTATATGTAGCTTTGAATGGGGACC<br>TCCTGGGGTGCCTGGACC                                | Amplify <i>ermE*</i> promoter with homology arms for assembly with <i>bla</i> and pCAP03             |
| <i>bla+ermE*p_F</i>                | TGACGCCTCCCATGGTATAAATAGTGGCTCGAGCATT<br>CAAATATGTATCCGCTCATGAGA                         | Amplify <i>bla</i> with homology to <i>ermE*p</i> and pCAP03 for assembly                            |
| <i>bla+ermE*p_R</i>                | CAGCCGTCAAGATCGACCGCGTGCACCACATATGTT<br>ACCAATGCTTAATCAGTGAGGCAC                         | Amplify <i>bla</i> with homology to <i>ermE*p</i> and pCAP03 for assembly                            |
| <i>ermE*p_cas_insert_F</i>         | CAGGGTCGCCGTGACGGCGAACTGGAGGCGGGCGA<br>GGTCGACGACGTCCACATGGGGACCTCTGGGGTG<br>CGTTGG      | Amplify <i>ermE*p</i> cassette with homology sequences for targeted insertion into <i>spz</i> BGC    |
| <i>ermE*p_cas_insert_R</i>         | CTTCCACAGCCACGCCCGCGCCCTCCTCGGCTGATC<br>CCCGCCCGGTCTCTCTCGAGCATTCAAATATGTATCC<br>GCTCATG | Amplify <i>ermE*p</i> cassette with homology sequences for targeted insertion into <i>spz</i> BGC    |
| <i>ermE*p_cas_insert_seq_F</i>     | GTGAGGTGCTCGTGCGCAG                                                                      | Confirm <i>ermE*p</i> cassette insertion within <i>spz</i> BGC                                       |
| <i>ermE*p_cas_insert_seq_R</i>     | GTCCTGCCCGAGCAGTATGTCC                                                                   | Confirm <i>ermE*p</i> cassette insertion within <i>spz</i> BGC                                       |
| $\Delta$ <i>spz15_F</i>            | ACGGGTTCCAGGCGGCCGGAGACGACGTCCTCGCG<br>CAGCGCCCCCGGTCTCAGCCAATCGACTGGCGAG<br>CGGCAT      | Delete <i>spz15</i> (adenylation protein)                                                            |
| $\Delta$ <i>spz15_R</i>            | GGCGGGTCTCGGCTCCAGCCCTGAGCCCGGGGCG<br>ACTCTCCGCCTCCGGTTCATGTGCAGCTCCATCAG<br>CAAAG       | Delete <i>spz15</i> (adenylation protein)                                                            |
| $\Delta$ <i>spz15_seq_F</i>        | GTCAGGGCAGGATTCACGGAATG                                                                  | Confirmation of <i>spz15</i> deletion                                                                |
| $\Delta$ <i>spz15_seq_R</i>        | GTACGAACTCCGTTTCGACAGGGTG                                                                | Confirmation of <i>spz15</i> deletion                                                                |

**Table S6, related to STAR methods. Primers used for RT-PCR.**

| Primer name     | Sequence (5' to 3')          | Primer name    | Sequence (5' to 3')         |
|-----------------|------------------------------|----------------|-----------------------------|
| <i>hrdB_F</i>   | CCTCCGCCTGGTGGTCTCG          | <i>hrdB_R</i>  | AACTTGTAGCCCTTGGTGTAGTCGAAC |
| <i>spz1_F</i>   | CGTCACCGAGAGCAGCCACAGCG      | <i>spz1_R</i>  | GTTGCTCCAAGCACTGCGACTGCC    |
| <i>spz2_F</i>   | CGATCAGGGAGAAGTTCACGACG      | <i>spz2_R</i>  | CTGCACTTCTGTTCGTGCGCCTT     |
| <i>spz3_F</i>   | GGACATACTGCTCGGGCAGGAC       | <i>spz3_R</i>  | CAGTTGGAGTACTTCTCGCGG       |
| <i>spz4_F</i>   | GCCTGATCAGCACCACGTCGG        | <i>spz4_R</i>  | GAACTTCGCGTACGACCTGTGCG     |
| <i>spz5_F</i>   | CGATCTGCTCGAAGTCGAACAGCC     | <i>spz5_R</i>  | GACACCATGTACGCGTCACTCATCC   |
| <i>spz6_F</i>   | GTGCAGAGTCTCCAGAACGTCGTGG    | <i>spz6_R</i>  | CACACCGCAGGTCGTGTTACCTTC    |
| <i>spz7_F</i>   | GCGAGGCTGTACTCGCACTGGATG     | <i>spz7_R</i>  | GTCTCCGAATACGCGCTGGGCAC     |
| <i>spz8_F</i>   | GAACGTGGTCACCGAATGTCCAG      | <i>spz8_R</i>  | GACCGAGCTCGACCTGTACTGCTTC   |
| <i>spz9_F</i>   | CTCGAAGAAGCTCTCGTCCGGTTCCG   | <i>spz9_R</i>  | CTTGAGGACTGGAAGCCGTACGGG    |
| <i>spz10_F</i>  | GTGGTCTGAACAGGTCGATCAGCTC    | <i>spz10_R</i> | GAGAAGGATTCCTGACCCTCGTCCG   |
| <i>spz11_F</i>  | GTCTTGCTCCGCATCAGGAATTCC     | <i>spz11_R</i> | GATCACCTCGACATGATCGTCGAC    |
| <i>spz12_F</i>  | CTCACGTGGTGCATGACCACCTGG     | <i>spz12_R</i> | GACATCGTCGGCGTCTTCGAGAG     |
| <i>spz13_F</i>  | CGATGATCGCCTGGTGGGATCTC      | <i>spz13_R</i> | GTGGTGGCGACGACGTCTGAAC      |
| <i>spz14_F</i>  | CGAGATGACGTACGTCCACCACGC     | <i>spz14_R</i> | GCTTCCAGACGGCCTACCGGCATC    |
| <i>spz15_F</i>  | CACGTCCGCCAGGTGGTAGGTGAG     | <i>spz15_R</i> | GAGGTGACGGTGTGGTTCTCGGTG    |
| <i>spz16_F</i>  | CTCCACCCTGTCTGAACGGAGTTC     | <i>spz16_R</i> | GACCGCCGATATCACCGTCCCCTTTC  |
| <i>spz17_F</i>  | GCGAGAACATCCTGCTGCGCCAC      | <i>spz17_R</i> | CTCCTATGTGGTTCGTGACGCCTTC   |
| <i>spz18_F</i>  | CGGTTGATCTCGACGACACCGAGC     | <i>spz18_R</i> | CTGGACTCCGCGATCCTCATCCGC    |
| <i>spz19_F</i>  | CACCAGGAAGGTGCGGATGTCTGTG    | <i>spz19_R</i> | CTGGAATCCCCGCATCCACCCG      |
| <i>spz20_F</i>  | CAGGTACTTGTCTCCGACGCCCGAC    | <i>spz20_R</i> | CTCGACTACGAGCTGCCGATGCTG    |
| <i>spz21_F</i>  | CTGGTCTGAACGGGTTTCATGAACCTCG | <i>spz21_R</i> | GCTGACCCGGCATCTCTGTTCAC     |
| <i>spz122_F</i> | CTGGTCAACACGGAGAAGGCCGTC     | <i>spz22_R</i> | GATTCCAGATCGAAGCCGATCGGATC  |
| <i>spz23_F</i>  | CTAGTCGCCGGAGAGGAGCTGCGC     | <i>spz23_R</i> | GTATCGCGTCTCTGCTCCTCAGC     |
| <i>spz24_F</i>  | CAACTCCTCGTAGGCGTGCGACAC     | <i>spz24_R</i> | CTACCGTCTCTCCTGCGGCTGGATC   |
| <i>spz25_F</i>  | GGTGGTGTAGGTGAAGTCCACCCAC    | <i>spz25_R</i> | GAAGTCGTACGACCAGAGCGGTGTG   |
| <i>spz26_F</i>  | CGAACATCAGGATGGAGGCCGTCAG    | <i>spz26_R</i> | GCTGGAGTACTTCTGGTGGGGCTCG   |
| <i>spz27_F</i>  | CGTCGAGCCGGAGGTCTGAAGAAG     | <i>spz27_R</i> | CAAGGACATCTGGCCGAGTGCTG     |
| <i>spz28_F</i>  | CGATCAGCTGGTCTCTCTGGGACCG    | <i>spz28_R</i> | GACTAGGGCCAGGCCAAGGAGCG     |
